# Supplementary material for: Identification of 13 Guanidinobenzoyl- or Aminidinobenzoyl-Containing Drugs to Potentially Inhibit TMPRSS2 for COVID-19 Treatment
Source: MDPI journal article supplement (doi:10.3390/ijms22137060), 2021-06-30
Supplement: s1 [file s1]

## Supporting Information

### Identification of 13 guanidinobenzoyl- or aminidinobenzoyl-containing drugs to potentially inhibit TMPRSS2 for COVID-19 treatment

Xiaoqiang Huang<sup>1</sup>, Robin Pearce<sup>1</sup>, Gilbert S. Omenn<sup>1,2</sup>, and Yang Zhang<sup>1,3\*</sup>

<sup>1</sup>Department of Computational Medicine and Bioinformatics, <sup>2</sup>Departments of Internal Medicine and Human Genetics and School of Public Health, <sup>3</sup>Department of Biological Chemistry, University of Michigan, 100 Washtenaw Avenue, Ann Arbor, MI 48109, USA

\* To whom correspondence should be addressed. Email: [zhng@umich.edu](mailto:zhng@umich.edu)

#### Table of Contents

##### Supporting Tables

**Table S1.** LeDock/EvoEF2 scores and the formation of salt-bridge interactions with Asp435 for all the poses of each compound.

**Table S2.** Mean and median ligand RMSD calculated from 100 ns molecular dynamics simulations for each compound with different poses.

**Table S3.** Mean and median  $d_{ON}^{min}$  distance calculated from 100 ns molecular dynamics simulations for each compound with different poses.

**Table S4.** MM/GBSA binding free energy for the control compounds bound to TMPRSS2.

##### Supporting Figures

**Figure S1.** The workflow for searching and narrowing down the hit list of guanidinobenzoyl- or aminidinobenzoyl-containing drugs.

**Figure S2.** Summary of the statistics for the MolProbity assessment of the TMPRSS2 model.

**Figure S3.** Five weak TMPRSS2 inhibitors used as control compounds in this study.

**Figure S4.** RMSD of TMPRSS2 calculated from 100 ns molecular dynamics simulations for each compound with different poses.

**Figure S5.** RMSF of TMPRSS2 residues calculated from 100 ns molecular dynamics simulations for each compound with different poses.

**Figure S6.** Ligand RMSD calculated from 100 ns molecular dynamics simulations for each compound with different poses.

**Figure S7.** The  $d_{ON}^{min}$  distance calculated from 100 ns molecular dynamics simulation for each compound with different poses.

**Figure S8.** Salt-bridge and hydrogen-bonding interactions for other repurposed drugs at the end of the 100-ns MD simulations.

### Supporting Tables

**Table S1.** LeDock/EvoEF2 scores and the formation of salt-bridge interactions with Asp435 for all the poses of each compound.

| Compound ID | Name        | LeDock     |                  | EvoEF2   |               | Salt-bridge interactions with Asp435 |
|-------------|-------------|------------|------------------|----------|---------------|--------------------------------------|
|             |             | Pose index | Score (kcal/mol) | Rank     | Score (EEU)   |                                      |
| CID2442     | Bromohexine | <b>1</b>   | <b>-5.75</b>     | 2        | -18.28        | No                                   |
|             |             | 2          | -5.73            | 3        | -14.15        | No                                   |
|             |             | 3          | -5.68            | 5        | -6.664        | No                                   |
|             |             | 4          | -5.40            | 4        | -13.07        | No                                   |
|             |             | 5          | -5.37            | <b>1</b> | <b>-21.56</b> | No                                   |
| CID2882138  | 4401-0077   | <b>1</b>   | <b>-4.77</b>     | <b>1</b> | <b>-17.44</b> | No                                   |
|             |             | 2          | -4.44            | 2        | -11.35        | No                                   |
| CID5395514  | 4554-5138   | <b>1</b>   | <b>-5.41</b>     | <b>1</b> | <b>-23.78</b> | No                                   |
|             |             | 2          | -5.06            | 2        | -19.51        | No                                   |
| CID693919   | 8008-1235   | <b>1</b>   | <b>-5.11</b>     | 3        | 49.36         | No                                   |
|             |             | 2          | -4.90            | <b>1</b> | <b>-20.33</b> | No                                   |
|             |             | 3          | -4.24            | 2        | -16.06        | No                                   |
| CID765269   | 0591-5329   | <b>1</b>   | <b>-4.97</b>     | 3        | -20.81        | No                                   |
|             |             | 2          | -4.80            | 5        | -20.01        | No                                   |
|             |             | 3          | -4.79            | 7        | -18.76        | No                                   |
|             |             | 4          | -4.76            | 4        | -20.37        | No                                   |
|             |             | 5          | -4.74            | 8        | -18.75        | No                                   |
|             |             | 6          | -4.73            | <b>1</b> | <b>-21.97</b> | No                                   |
|             |             | 7          | -4.70            | 2        | -21.03        | No                                   |
|             |             | 8          | -4.62            | 10       | -17.38        | No                                   |
|             |             | 9          | -4.53            | 6        | -19.20        | No                                   |
|             |             | 10         | -4.49            | 9        | -18.28        | No                                   |
| DB00738     | Pentamidine | <b>1</b>   | <b>-8.73</b>     | 6        | -30.07        | Yes                                  |
|             |             | 2          | -8.35            | 12       | -23.14        | Yes                                  |
|             |             | 3          | -8.24            | 5        | -30.57        | Yes                                  |
|             |             | 4          | -8.03            | <b>1</b> | <b>-37.36</b> | Yes                                  |
|             |             | 5          | -8.01            | 4        | -31.15        | Yes                                  |
|             |             | 6          | -7.72            | 11       | -24.09        | Yes                                  |
|             |             | 7          | -7.68            | 3        | -31.48        | Yes                                  |
|             |             | 8          | -7.61            | 8        | -28.07        | Yes                                  |
|             |             | 9          | -7.57            | 9        | -25.58        | Yes                                  |
|             |             | 10         | -7.42            | 2        | -32.47        | Yes                                  |
|             |             | 11         | -7.42            | 10       | -24.40        | Yes                                  |
|             |             | 12         | -7.36            | 7        | -30.02        | Yes                                  |
| DB03808     | Hexamidine  | <b>1</b>   | <b>-8.47</b>     | 2        | -34.81        | Yes                                  |
|             |             | 2          | -8.35            | 4        | -33.87        | Yes                                  |
|             |             | 3          | -8.20            | 7        | -31.46        | Yes                                  |
|             |             | 4          | -8.01            | 8        | -30.12        | Yes                                  |
|             |             | 5          | -7.86            | 6        | -32.97        | Yes                                  |
|             |             | 6          | -7.77            | 3        | -34.19        | Yes                                  |
|             |             | 7          | -7.76            | 9        | -29.09        | Yes                                  |
|             |             | 8          | -7.68            | 5        | -33.44        | Yes                                  |
|             |             | 9          | -7.66            | <b>1</b> | <b>-35.08</b> | Yes                                  |
|             |             | 10         | -7.16            | 10       | -28.29        | Yes                                  |
|             |             | 11         | -7.08            | 14       | -25.84        | Yes                                  |
|             |             | 12         | -7.06            | 11       | -27.90        | Yes                                  |
|             |             | 13         | -7.04            | 13       | -25.92        | Yes                                  |
|             |             | 14         | -7.03            | 12       | -26.18        | No                                   |
|             |             | 15         | -6.76            | 15       | -12.06        | Yes                                  |

|         |            |          |              |          |               |     |
|---------|------------|----------|--------------|----------|---------------|-----|
| DB05038 | Anatibant  | <b>1</b> | <b>-8.60</b> | 17       | -10.34        | No  |
|         |            | 2        | -8.21        | 12       | -22.46        | No  |
|         |            | 3        | -7.87        | 15       | -15.26        | No  |
|         |            | 4        | -7.86        | 5        | -27.57        | No  |
|         |            | 5        | -7.78        | 2        | -33.59        | No  |
|         |            | 6        | -7.74        | 14       | -22.10        | No  |
|         |            | 7        | -7.67        | 13       | -22.28        | No  |
|         |            | 8        | -7.41        | 9        | -24.81        | No  |
|         |            | 9        | -7.34        | 6        | -27.26        | No  |
|         |            | 10       | -7.16        | <b>1</b> | <b>-34.21</b> | Yes |
|         |            | 11       | -7.12        | 16       | -13.87        | No  |
|         |            | 12       | -7.07        | 18       | 40.79         | No  |
|         |            | 13       | -6.93        | 4        | -30.38        | No  |
|         |            | 14       | -6.90        | 10       | -24.52        | No  |
|         |            | 15       | -6.85        | 8        | -25.17        | No  |
|         |            | 16       | -6.66        | 7        | -25.46        | No  |
|         |            | 17       | -6.33        | 11       | -24.45        | No  |
|         |            | 18       | -6.30        | 3        | -32.04        | No  |
| DB05476 | WX-UK1     | <b>1</b> | <b>-8.57</b> | 3        | -35.36        | Yes |
|         |            | 2        | -8.35        | 5        | -32.92        | Yes |
|         |            | 3        | -8.30        | 15       | -12.03        | No  |
|         |            | 4        | -8.11        | <b>1</b> | <b>-39.29</b> | Yes |
|         |            | 5        | -7.98        | 8        | -26.64        | Yes |
|         |            | 6        | -7.79        | 6        | -31.35        | Yes |
|         |            | 7        | -7.64        | 2        | -35.60        | Yes |
|         |            | 8        | -7.59        | 4        | -33.36        | Yes |
|         |            | 9        | -7.44        | 16       | -11.77        | Yes |
|         |            | 10       | -7.30        | 10       | -21.42        | No  |
|         |            | 11       | -7.17        | 17       | 0.01          | No  |
|         |            | 12       | -6.88        | 11       | -21.21        | Yes |
|         |            | 13       | -6.77        | 13       | -16.44        | No  |
|         |            | 14       | -6.32        | 7        | -26.79        | No  |
|         |            | 15       | -6.29        | 9        | -23.68        | No  |
|         |            | 16       | -6.10        | 14       | -13.01        | Yes |
|         |            | 17       | -5.58        | 12       | -17.88        | No  |
| DB06472 | Fradafiban | <b>1</b> | <b>-7.32</b> | 4        | -29.48        | Yes |
|         |            | 2        | -7.16        | 2        | -30.45        | Yes |
|         |            | 3        | -7.07        | 3        | -29.73        | Yes |
|         |            | 4        | -6.97        | 6        | -25.54        | Yes |
|         |            | 5        | -6.80        | <b>1</b> | <b>-30.48</b> | Yes |
|         |            | 6        | -6.72        | 7        | -21.49        | No  |
|         |            | 7        | -6.45        | 8        | -20.60        | No  |
|         |            | 8        | -6.34        | 5        | -26.78        | Yes |
| DB06635 | Otamixaban | <b>1</b> | <b>-8.50</b> | 3        | -37.61        | Yes |
|         |            | 2        | -7.95        | 2        | -37.94        | Yes |
|         |            | 3        | -7.70        | 6        | -36.26        | Yes |
|         |            | 4        | -7.62        | 8        | -29.92        | Yes |
|         |            | 5        | -7.45        | 5        | -36.99        | Yes |
|         |            | 6        | -7.34        | 7        | -34.06        | Yes |
|         |            | 7        | -7.29        | <b>1</b> | <b>-40.43</b> | Yes |
|         |            | 8        | -7.26        | 17       | -5.02         | Yes |
|         |            | 9        | -6.93        | 10       | -27.24        | Yes |
|         |            | 10       | -6.85        | 15       | -6.45         | No  |
|         |            | 11       | -6.82        | 9        | -28.94        | Yes |
|         |            | 12       | -6.82        | 4        | -37.37        | No  |
| 13      | -6.36      | 11       | -24.68       | No       |               |     |

|         |             |          |              |          |               |     |
|---------|-------------|----------|--------------|----------|---------------|-----|
|         |             | 14       | -6.26        | 14       | -10.07        | No  |
|         |             | 15       | -6.04        | 12       | -22.66        | No  |
|         |             | 16       | -5.74        | 13       | -19.07        | No  |
|         |             | 17       | -5.25        | 16       | -5.78         | Yes |
| DB12120 | Avoralstat  | <b>1</b> | <b>-9.35</b> | <b>1</b> | <b>-46.30</b> | Yes |
|         |             | 2        | -8.77        | 4        | -26.41        | Yes |
|         |             | 3        | -8.62        | 2        | -36.69        | Yes |
|         |             | 4        | -8.00        | 3        | -33.56        | Yes |
|         |             | 5        | -7.53        | 5        | -24.87        | Yes |
|         |             | 6        | -6.96        | 6        | -24.74        | Yes |
|         |             | 7        | -6.64        | 7        | -19.98        | No  |
| DB12598 | Nafamostat  | <b>1</b> | <b>-8.61</b> | <b>1</b> | <b>-34.70</b> | Yes |
|         |             | 2        | -8.46        | 3        | -28.96        | Yes |
|         |             | 3        | -8.21        | 4        | -24.37        | Yes |
|         |             | 4        | -8.01        | 2        | -31.60        | Yes |
|         |             | 5        | -7.57        | 6        | -18.78        | Yes |
|         |             | 6        | -7.37        | 5        | -20.01        | Yes |
| DB13000 | PCI-27483   | <b>1</b> | <b>-9.44</b> | 5        | -33.42        | Yes |
|         |             | 2        | -9.33        | 15       | 4.12          | No  |
|         |             | 3        | -8.91        | 13       | -19.84        | Yes |
|         |             | 4        | -8.88        | 7        | -30.30        | Yes |
|         |             | 5        | -8.86        | 2        | -36.29        | Yes |
|         |             | 6        | -8.56        | 8        | -28.78        | Yes |
|         |             | 7        | -8.56        | 3        | -36.25        | Yes |
|         |             | 8        | -8.48        | 4        | -35.11        | No  |
|         |             | 9        | -8.26        | 6        | -31.17        | Yes |
|         |             | 10       | -8.18        | 9        | -27.96        | Yes |
|         |             | 11       | -8.14        | 11       | -25.70        | No  |
|         |             | 12       | -8.14        | 14       | -17.84        | Yes |
|         |             | 13       | -8.02        | <b>1</b> | <b>-36.84</b> | Yes |
|         |             | 14       | -7.89        | 10       | -26.37        | No  |
|         |             | 15       | -7.21        | 16       | 22.57         | No  |
|         |             | 16       | -7.07        | 12       | -25.04        | No  |
| DB13296 | Propamidine | <b>1</b> | <b>-7.93</b> | 4        | -29.77        | Yes |
|         |             | 2        | -7.78        | 13       | -25.08        | Yes |
|         |             | 3        | -7.70        | 9        | -28.08        | Yes |
|         |             | 4        | -7.63        | 6        | -29.25        | Yes |
|         |             | 5        | -7.61        | 12       | -25.19        | Yes |
|         |             | 6        | -7.52        | 3        | -31.90        | Yes |
|         |             | 7        | -7.43        | 10       | -26.86        | Yes |
|         |             | 8        | -7.33        | 11       | -26.76        | Yes |
|         |             | 9        | -7.33        | <b>1</b> | <b>-32.48</b> | Yes |
|         |             | 10       | -7.31        | 2        | -31.95        | Yes |
|         |             | 11       | -7.14        | 14       | -24.59        | No  |
|         |             | 12       | -7.07        | 8        | -28.61        | Yes |
|         |             | 13       | -7.02        | 7        | -29.03        | Yes |
|         |             | 14       | -6.96        | 5        | -29.76        | Yes |
| DB13729 | Camostat    | <b>1</b> | <b>-8.02</b> | 8        | -20.88        | Yes |
|         |             | 2        | -7.96        | <b>1</b> | <b>-27.02</b> | Yes |
|         |             | 3        | -7.82        | 5        | -24.27        | Yes |
|         |             | 4        | -7.75        | 2        | -26.14        | Yes |
|         |             | 5        | -7.42        | 11       | -17.33        | Yes |
|         |             | 6        | -7.41        | 12       | -17.00        | Yes |
|         |             | 7        | -7.18        | 9        | -19.87        | Yes |
|         |             | 8        | -7.18        | 10       | -17.81        | Yes |
|         |             | 9        | -7.16        | 7        | -21.16        | Yes |

|         |                     |          |              |          |               |     |
|---------|---------------------|----------|--------------|----------|---------------|-----|
|         |                     | 10       | -7.07        | 6        | -22.01        | Yes |
|         |                     | 11       | -6.92        | 3        | -24.69        | Yes |
|         |                     | 12       | -6.15        | 4        | -24.53        | No  |
|         |                     | 13       | -6.14        | 13       | -13.52        | Yes |
| DB14726 | Dabigatran          | <b>1</b> | <b>-9.51</b> | <b>1</b> | <b>-42.58</b> | Yes |
|         |                     | 2        | -8.81        | 12       | -16.41        | Yes |
|         |                     | 3        | -8.41        | 2        | -40.81        | Yes |
|         |                     | 4        | -8.26        | 15       | -10.43        | Yes |
|         |                     | 5        | -8.20        | 5        | -31.28        | Yes |
|         |                     | 6        | -8.14        | 14       | -10.77        | Yes |
|         |                     | 7        | -8.08        | 4        | -31.77        | No  |
|         |                     | 8        | -7.90        | 3        | -33.29        | Yes |
|         |                     | 9        | -7.70        | 9        | -26.13        | Yes |
|         |                     | 10       | -7.64        | 11       | -21.25        | Yes |
|         |                     | 11       | -7.64        | 7        | -29.85        | No  |
|         |                     | 12       | -7.60        | 10       | -23.65        | Yes |
|         |                     | 13       | -7.51        | 8        | -29.10        | Yes |
|         |                     | 14       | -7.40        | 13       | -11.52        | Yes |
|         |                     | 15       | -7.27        | 6        | -30.84        | Yes |
| DB14753 | Hydroxystilbamidine | <b>1</b> | <b>-7.56</b> | 2        | -32.18        | Yes |
|         |                     | 2        | -7.27        | <b>1</b> | <b>-32.56</b> | Yes |
|         |                     | 3        | -7.23        | 3        | -30.49        | Yes |
|         |                     | 4        | -7.08        | 4        | -26.93        | Yes |

**Table S2.** Mean and median ligand RMSD calculated from 100 ns molecular dynamics simulations for each compound with different poses.

| Compound ID_pose | Ligand RMSD (Å) |        |
|------------------|-----------------|--------|
|                  | Mean±std        | Median |
| CID2442_01       | 7.7±6.2         | 5.2    |
| CID2442_02       | 4.5±0.6         | 4.4    |
| CID2442_03       | 8.3±6.7         | 4.5    |
| CID2442_04       | 2.7±0.5         | 2.6    |
| CID2442_05       | 11.0±3.3        | 10.6   |
| CID2882138_01    | 3.7±0.6         | 3.7    |
| CID2882138_02    | 2.1±0.5         | 2.2    |
| CID5395514_01    | 3.4±0.5         | 3.4    |
| CID5395514_02    | 19.5±8.3        | 19.2   |
| CID693919_01     | 6.3±1.2         | 6.4    |
| CID693919_02     | 6.5±0.6         | 6.5    |
| CID693919_03     | 12.6±1.4        | 12.7   |
| CID765269_01     | 7.7±2.4         | 7.4    |
| CID765269_02     | 15.4±0.2        | 15.2   |
| CID765269_03     | 9.1±7.9         | 3.9    |
| CID765269_04     | 6.0±1.8         | 5.2    |
| CID765269_05     | 3.4±0.8         | 3.2    |
| CID765269_06     | 16.7±9.4        | 18.5   |
| CID765269_07     | 5.8±1.1         | 5.8    |
| CID765269_08     | 3.5±0.5         | 3.5    |
| CID765269_09     | 6.8±1.4         | 7.1    |
| CID765269_10     | 4.3±1.0         | 4.2    |
| DB00738_01       | 8.0±3.9         | 8.6    |
| DB00738_03       | 7.0±2.9         | 6.8    |
| DB00738_04       | 4.7±1.2         | 5.0    |
| DB00738_05       | 3.2±1.0         | 3.1    |
| DB00738_07       | 4.0±3.2         | 2.7    |
| DB00738_08       | 5.9±3.6         | 3.6    |
| DB00738_09       | 4.0±1.1         | 3.6    |
| DB00738_10       | 2.7±1.6         | 2.2    |
| DB00738_11       | 9.3±2.5         | 10.2   |
| DB00738_12       | 4.8±0.9         | 4.8    |
| DB03808_01       | 4.9±1.6         | 4.9    |
| DB03808_02       | 6.8±1.6         | 7.3    |
| DB03808_03       | 3.3±1.4         | 2.7    |
| DB03808_04       | 8.6±2.2         | 9.4    |
| DB03808_05       | 6.1±3.0         | 5.2    |
| DB03808_06       | 4.0±1.1         | 4.3    |
| DB03808_07       | 4.0±1.1         | 3.7    |
| DB03808_08       | 7.3±1.3         | 7.3    |
| DB03808_09       | 5.2±1.6         | 4.6    |
| DB03808_10       | 7.6±0.9         | 7.6    |
| DB05038_04       | 4.8±1.5         | 4.4    |
| DB05038_05       | 10.8±2.6        | 11.5   |
| DB05038_08       | 7.7±0.8         | 7.8    |
| DB05038_09       | 4.2±0.8         | 4.3    |
| DB05038_10       | 3.3±0.6         | 3.1    |
| DB05038_13       | 6.0±1.5         | 6.4    |
| DB05038_14       | 8.9±1.0         | 8.9    |
| DB05038_15       | 11.1±1.5        | 11.2   |
| DB05038_16       | 11.1±2.7        | 11.9   |
| DB05038_18       | 5.0±1.4         | 4.5    |

|            |          |      |
|------------|----------|------|
| DB05476_01 | 2.7±0.3  | 2.6  |
| DB05476_02 | 5.0±0.8  | 5.0  |
| DB05476_05 | 5.5±0.9  | 5.7  |
| DB05476_06 | 3.9±0.6  | 3.8  |
| DB05476_07 | 3.7±1.0  | 3.6  |
| DB05476_08 | 6.5±0.5  | 6.5  |
| DB05476_10 | 4.4±0.6  | 4.5  |
| DB05476_14 | 6.3±1.5  | 6.5  |
| DB05476_15 | 2.8±0.3  | 2.7  |
| DB06472_01 | 5.7±1.1  | 5.8  |
| DB06472_02 | 11.5±1.7 | 12.2 |
| DB06472_03 | 3.2±1.4  | 2.9  |
| DB06472_04 | 4.0±2.7  | 2.7  |
| DB06472_05 | 9.8±1.8  | 10.2 |
| DB06472_06 | 4.4±1.5  | 3.9  |
| DB06472_07 | 4.4±1.0  | 4.4  |
| DB06472_08 | 3.8±1.0  | 3.8  |
| DB06635_01 | 10.3±2.6 | 11.2 |
| DB06635_02 | 3.1±0.4  | 3.1  |
| DB06635_03 | 2.5±1.6  | 2.1  |
| DB06635_04 | 2.9±0.7  | 2.7  |
| DB06635_05 | 2.6±0.5  | 2.7  |
| DB06635_06 | 3.6±0.5  | 3.5  |
| DB06635_07 | 5.1±1.0  | 5.0  |
| DB06635_09 | 5.3±1.6  | 4.9  |
| DB06635_11 | 7.4±0.9  | 7.5  |
| DB06635_12 | 6.5±2.2  | 7.8  |
| DB12120_01 | 4.2±1.2  | 4.0  |
| DB12120_02 | 5.8±1.1  | 6.2  |
| DB12120_03 | 3.8±0.7  | 4.0  |
| DB12120_04 | 2.9±0.6  | 2.8  |
| DB12120_05 | 2.9±0.7  | 2.7  |
| DB12120_06 | 3.7±0.6  | 3.7  |
| DB12120_07 | 5.6±1.4  | 5.3  |
| DB12598_01 | 3.3±0.7  | 3.2  |
| DB12598_02 | 3.9±1.1  | 4.0  |
| DB12598_03 | 5.8±2.9  | 6.5  |
| DB12598_04 | 2.1±0.5  | 2.1  |
| DB12598_05 | 2.8±0.7  | 2.6  |
| DB12598_06 | 3.3±0.7  | 3.4  |
| DB13000_01 | 5.6±1.6  | 5.5  |
| DB13000_04 | 4.3±0.6  | 4.3  |
| DB13000_05 | 6.4±1.5  | 7.1  |
| DB13000_08 | 7.8±1.2  | 7.9  |
| DB13000_09 | 7.8±0.6  | 7.9  |
| DB13296_01 | 2.3±0.7  | 2.1  |
| DB13296_03 | 7.0±1.8  | 7.6  |
| DB13296_04 | 5.0±2.4  | 4.1  |
| DB13296_06 | 2.3±0.7  | 2.2  |
| DB13296_07 | 6.8±2.4  | 8.1  |
| DB13296_09 | 2.5±0.6  | 2.4  |
| DB13296_10 | 5.0±2.9  | 3.7  |
| DB13296_12 | 5.0±2.5  | 4.1  |
| DB13296_13 | 3.5±2.4  | 2.3  |
| DB13296_14 | 6.6±1.5  | 7.2  |
| DB13729_01 | 4.9±1.3  | 5.3  |

|            |          |      |
|------------|----------|------|
| DB13729_02 | 4.2±1.0  | 3.8  |
| DB13729_03 | 4.3±1.0  | 4.3  |
| DB13729_04 | 3.1±0.6  | 2.9  |
| DB13729_07 | 12.1±1.6 | 12.5 |
| DB13729_08 | 9.2±1.5  | 9.4  |
| DB13729_09 | 15.3±3.6 | 16.8 |
| DB13729_10 | 7.2±1.2  | 7.6  |
| DB13729_11 | 7.8±3.1  | 8.9  |
| DB13729_12 | 5.0±0.6  | 5.1  |
| DB14726_01 | 7.0±2.3  | 7.4  |
| DB14726_03 | 10.0±2.4 | 10.5 |
| DB14726_05 | 4.9±0.7  | 4.9  |
| DB14726_07 | 12.5±3.5 | 13.9 |
| DB14726_08 | 3.6±1.1  | 3.6  |
| DB14726_09 | 8.2±1.0  | 8.4  |
| DB14726_11 | 10.9±1.4 | 11.2 |
| DB14726_12 | 5.9±2.7  | 5.0  |
| DB14726_13 | 5.0±2.0  | 3.8  |
| DB14726_15 | 4.0±0.7  | 3.9  |
| DB14753_01 | 3.8±0.7  | 3.7  |
| DB14753_02 | 2.9±1.0  | 3.0  |
| DB14753_03 | 5.2±1.7  | 5.3  |
| DB14753_04 | 2.6±0.7  | 2.4  |

---



**Table S3.** Mean and median  $d_{ON}^{min}$  distance calculated from 100 ns molecular dynamics simulations for each compound with different poses.

| Compound ID_pose | $d_{ON}^{min}$ (Å) |        |
|------------------|--------------------|--------|
|                  | Mean±std           | Median |
| CID2442_01       | 8.3±3.2            | 5.7    |
| CID2442_02       | 5.3±1.3            | 5.2    |
| CID2442_03       | 9.8±7.3            | 3.6    |
| CID2442_04       | 5.7±0.6            | 5.8    |
| CID2442_05       | 13.6±2.6           | 13.5   |
| CID2882138_01    | 5.9±0.4            | 5.9    |
| CID2882138_02    | 5.4±1.0            | 5.7    |
| CID5395514_01    | 2.6±0.1            | 2.6    |
| CID5395514_02    | 11.5±7.2           | 7.7    |
| CID693919_01     | 4.1±0.9            | 3.7    |
| CID693919_02     | 3.8±0.4            | 3.7    |
| CID693919_03     | 9.6±1.1            | 8.9    |
| CID765269_01     | 6.6±1.2            | 6.7    |
| CID765269_02     | 15.7±9.3           | 28.9   |
| CID765269_03     | 9.0±5.1            | 5.7    |
| CID765269_04     | 7.1±1.0            | 7.3    |
| CID765269_05     | 4.9±1.2            | 4.6    |
| CID765269_06     | 12.5±8.0           | 17.8   |
| CID765269_07     | 4.5±0.8            | 4.3    |
| CID765269_08     | 4.2±1.0            | 3.8    |
| CID765269_09     | 5.7±0.8            | 5.9    |
| CID765269_10     | 4.3±1.1            | 3.8    |
| DB00738_01       | 4.5±2.0            | 3.1    |
| DB00738_03       | 8.4±5.0            | 2.8    |
| DB00738_04       | 2.8±0.1            | 2.8    |
| DB00738_05       | 2.8±0.1            | 2.8    |
| DB00738_07       | 2.8±0.1            | 2.8    |
| DB00738_08       | 2.8±0.1            | 2.8    |
| DB00738_09       | 2.8±0.1            | 2.8    |
| DB00738_10       | 2.8±0.1            | 2.8    |
| DB00738_11       | 2.8±0.1            | 2.8    |
| DB00738_12       | 2.8±0.1            | 2.8    |
| DB03808_01       | 2.9±0.5            | 2.8    |
| DB03808_02       | 2.8±0.1            | 2.8    |
| DB03808_03       | 2.8±0.1            | 2.8    |
| DB03808_04       | 2.8±0.1            | 2.8    |
| DB03808_05       | 2.8±0.1            | 2.8    |
| DB03808_06       | 2.8±0.1            | 2.8    |
| DB03808_07       | 2.8±0.1            | 2.8    |
| DB03808_08       | 2.8±0.1            | 2.8    |
| DB03808_09       | 2.8±0.1            | 2.8    |
| DB03808_10       | 2.8±0.1            | 2.8    |
| DB05038_04       | 8.3±0.4            | 8.3    |
| DB05038_05       | 15.1±1.6           | 15.0   |
| DB05038_08       | 9.8±1.5            | 11.9   |
| DB05038_09       | 7.6±1.1            | 7.4    |
| DB05038_10       | 2.8±0.2            | 2.7    |
| DB05038_13       | 11.3±1.0           | 11.5   |
| DB05038_14       | 7.5±0.5            | 7.4    |
| DB05038_15       | 13.2±1.4           | 13.0   |
| DB05038_16       | 14.9±1.7           | 15.1   |

|            |          |      |
|------------|----------|------|
| DB05038_18 | 8.4±0.4  | 8.4  |
| DB05476_01 | 2.9±0.2  | 2.9  |
| DB05476_02 | 2.9±0.2  | 2.9  |
| DB05476_05 | 2.8±0.1  | 2.8  |
| DB05476_06 | 2.8±0.1  | 2.8  |
| DB05476_07 | 2.8±0.1  | 2.8  |
| DB05476_08 | 2.8±0.1  | 2.8  |
| DB05476_10 | 8.6±0.4  | 8.6  |
| DB05476_14 | 3.4±1.1  | 2.9  |
| DB05476_15 | 3.2±0.7  | 3.0  |
| DB06472_01 | 2.7±0.1  | 2.7  |
| DB06472_02 | 7.2±2.8  | 8.3  |
| DB06472_03 | 2.8±0.1  | 2.8  |
| DB06472_04 | 2.8±0.1  | 2.8  |
| DB06472_05 | 5.3±1.1  | 5.5  |
| DB06472_06 | 2.8±0.1  | 2.8  |
| DB06472_07 | 2.8±0.1  | 2.8  |
| DB06472_08 | 2.8±0.1  | 2.8  |
| DB06635_01 | 2.8±0.1  | 2.8  |
| DB06635_02 | 2.8±0.1  | 2.8  |
| DB06635_03 | 3.4±1.0  | 2.9  |
| DB06635_04 | 2.8±0.1  | 2.8  |
| DB06635_05 | 2.8±0.1  | 2.8  |
| DB06635_06 | 2.8±0.1  | 2.8  |
| DB06635_07 | 2.8±0.1  | 2.8  |
| DB06635_09 | 2.8±0.1  | 2.8  |
| DB06635_11 | 2.8±0.1  | 2.8  |
| DB06635_12 | 5.4±0.6  | 5.5  |
| DB12120_01 | 2.7±0.1  | 2.7  |
| DB12120_02 | 4.4±0.9  | 4.7  |
| DB12120_03 | 2.8±0.1  | 2.8  |
| DB12120_04 | 2.7±0.1  | 2.7  |
| DB12120_05 | 2.8±0.1  | 2.7  |
| DB12120_06 | 2.8±0.2  | 2.7  |
| DB12120_07 | 10.4±1.3 | 11.6 |
| DB12598_01 | 2.8±0.1  | 2.8  |
| DB12598_02 | 2.8±0.1  | 2.8  |
| DB12598_03 | 2.8±0.1  | 2.8  |
| DB12598_04 | 2.8±0.1  | 2.8  |
| DB12598_05 | 3.2±0.8  | 2.8  |
| DB12598_06 | 4.2±1.1  | 4.7  |
| DB13000_01 | 3.3±0.5  | 3.1  |
| DB13000_04 | 2.8±0.1  | 2.8  |
| DB13000_05 | 2.8±0.1  | 2.8  |
| DB13000_08 | 8.8±2.1  | 5.4  |
| DB13000_09 | 2.8±0.1  | 2.8  |
| DB13296_01 | 2.8±0.1  | 2.8  |
| DB13296_03 | 2.8±0.1  | 2.8  |
| DB13296_04 | 2.8±0.1  | 2.8  |
| DB13296_06 | 2.8±0.1  | 2.8  |
| DB13296_07 | 2.8±0.1  | 2.8  |
| DB13296_09 | 2.8±0.1  | 2.8  |
| DB13296_10 | 2.8±0.1  | 2.8  |
| DB13296_12 | 2.8±0.1  | 2.8  |
| DB13296_13 | 3.3±1.2  | 2.8  |
| DB13296_14 | 2.8±0.1  | 2.8  |

|            |          |      |
|------------|----------|------|
| DB13729_01 | 2.8±0.1  | 2.8  |
| DB13729_02 | 3.8±1.0  | 3.2  |
| DB13729_03 | 2.8±0.1  | 2.8  |
| DB13729_04 | 2.8±0.1  | 2.8  |
| DB13729_07 | 2.9±0.2  | 2.8  |
| DB13729_08 | 3.0±0.4  | 2.9  |
| DB13729_09 | 10.8±4.5 | 12.9 |
| DB13729_10 | 2.8±0.1  | 2.8  |
| DB13729_11 | 2.8±0.1  | 2.8  |
| DB13729_12 | 9.2±1.3  | 9.0  |
| DB14726_01 | 3.0±0.5  | 2.8  |
| DB14726_03 | 3.0±0.5  | 2.9  |
| DB14726_05 | 2.8±0.1  | 2.8  |
| DB14726_07 | 9.6±1.8  | 7.8  |
| DB14726_08 | 2.7±0.1  | 2.7  |
| DB14726_09 | 2.7±0.1  | 2.7  |
| DB14726_11 | 2.8±0.1  | 2.7  |
| DB14726_12 | 2.8±0.1  | 2.8  |
| DB14726_13 | 2.8±0.1  | 2.8  |
| DB14726_15 | 2.7±0.1  | 2.7  |
| DB14753_01 | 2.7±0.1  | 2.7  |
| DB14753_02 | 2.7±0.1  | 2.7  |
| DB14753_03 | 2.8±0.2  | 2.7  |
| DB14753_04 | 2.7±0.1  | 2.7  |

---

**Table S4.** MM/GBSA binding free energy for the control compounds bound to TMPRSS2.

| Compound ID_pose | $\Delta E_{vdW}$<br>(kcal/mol) | $\Delta E_{ele}$<br>(kcal/mol) | $\Delta G_{GB}$<br>(kcal/mol) | $\Delta G_{SA}$<br>(kcal/mol) | $-T\Delta S$<br>(kcal/mol) | $\Delta G_{bind}$<br>(kcal/mol) |
|------------------|--------------------------------|--------------------------------|-------------------------------|-------------------------------|----------------------------|---------------------------------|
| CID2442_04       | -36.46±2.79                    | -16.51±6.30                    | 20.94±5.60                    | -3.65±0.18                    | 15.09                      | -20.60±3.05                     |
| CID2882138_02    | -34.28±2.12                    | -40.56±5.20                    | 44.14±4.82                    | -3.29±0.16                    | 13.00                      | -21.00±2.01                     |
| CID5395514_01    | -30.48±2.96                    | -12.27±1.97                    | 14.60±1.79                    | -3.19±0.19                    | 5.73                       | -25.61±2.36                     |
| CID693919_01     | -31.70±2.62                    | -5.85±1.50                     | 10.78±1.29                    | -3.25±0.26                    | 4.36                       | -25.67±2.71                     |
| CID765269_05     | -23.91±3.09                    | -4.57±1.70                     | 9.94±1.68                     | -2.95±0.38                    | 9.12                       | -12.37±3.03                     |

## Supporting Figures

[https://go.drugbank.com/structures/search/small\\_molecule\\_drugs/structure](https://go.drugbank.com/structures/search/small_molecule_drugs/structure)

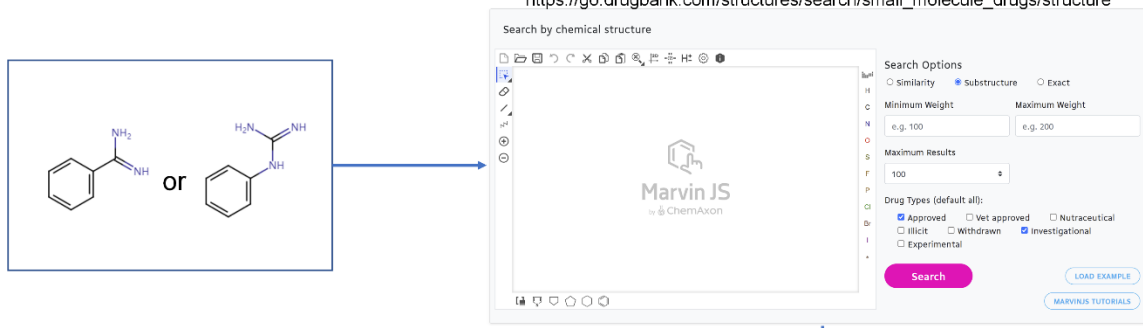

The screenshot shows the Marvin JS search interface. On the left, two chemical structures are shown: an aminidino group (N=C(N)N) and a guanidino group (N=C(N)N). An arrow points from these structures to the search interface. The interface includes a search bar, a toolbar, and search options. The search options include: Similarity (selected), Substructure, and Exact. Minimum Weight is set to e.g. 100, and Maximum Weight is set to e.g. 200. Maximum Results is set to 100. Drug Types (default: all) are checked for Approved, Vet approved, Nutraceutical, Illicit, Withdrawn, Investigational, and Experimental. A Search button is visible.

|   |         |                                                                                    |                                                                   |                                                   |
|---|---------|------------------------------------------------------------------------------------|-------------------------------------------------------------------|---------------------------------------------------|
| ✓ | DB00738 |   | Pentamidine<br>100-33-4<br><b>approved</b> <b>investigational</b> | $C_{19}H_{24}N_4O_2$<br>Mono mass: 340.189926032  |
| ✗ | DB01224 |   | Quetiapine<br>111974-69-7<br><b>approved</b>                      | $C_{21}H_{25}N_3O_2S$<br>Mono mass: 383.166747749 |
| ✓ | DB03808 |  | Hexamidine<br>3811-75-4<br><b>approved</b> <b>experimental</b>    | $C_{26}H_{26}N_4O_2$<br>Mono mass: 354.205576096  |

**Figure S1.** The workflow for searching and narrowing down the hit list of guanidinobenzoyl- or aminidinobenzoyl-containing drugs.

### Summary statistics

|                         |                                                                               |             |                                                        |
|-------------------------|-------------------------------------------------------------------------------|-------------|--------------------------------------------------------|
| All-Atom Contacts       | Clashscore, all atoms:                                                        | 1.65        | 99 <sup>th</sup> percentile* (N=1784, all resolutions) |
|                         | Clashscore is the number of serious steric overlaps (> 0.4 Å) per 1000 atoms. |             |                                                        |
| Protein Geometry        | Poor rotamers                                                                 | 0           | 0.00% Goal: <0.3%                                      |
|                         | Favored rotamers                                                              | 198         | 100.00% Goal: >98%                                     |
|                         | Ramachandran outliers                                                         | 1           | 0.43% Goal: <0.05%                                     |
|                         | Ramachandran favored                                                          | 231         | 98.30% Goal: >98%                                      |
|                         | Rama distribution Z-score                                                     | 0.50 ± 0.55 | Goal: abs(Z score) < 2                                 |
|                         | MolProbity score <sup>†</sup>                                                 | 0.91        | 100 <sup>th</sup> percentile* (N=27675, 0Å - 99Å)      |
|                         | CP deviations >0.25Å                                                          | 0           | 0.00% Goal: 0                                          |
|                         | Bad bonds:                                                                    | 0 / 1898    | 0.00% Goal: 0%                                         |
|                         | Bad angles:                                                                   | 5 / 2590    | 0.19% Goal: <0.1%                                      |
|                         | Cis Prolines:                                                                 | 0 / 14      | 0.00% Expected: ≤1 per chain, or ≤5%                   |
| Low-resolution Criteria | CaBLAM outliers                                                               | 5           | 2.1% Goal: <1.0%                                       |
|                         | CA Geometry outliers                                                          | 4           | 1.72% Goal: <0.5%                                      |
| Additional validations  | Chiral volume outliers                                                        | 0/277       |                                                        |
|                         | Waters with clashes                                                           | 0/0         | 0.00% See UnDownser table for details                  |

In the two column results, the left column gives the raw count, right column gives the percentage.

\* 100<sup>th</sup> percentile is the best among structures of comparable resolution; 0<sup>th</sup> percentile is the worst. For clashscore the comparative set of structures was selected in 2004, for MolProbity score in 2006.

<sup>†</sup> MolProbity score combines the clashscore, rotamer, and Ramachandran evaluations into a single score, normalized to be on the same scale as X-ray resolution.

Key to table colors and cutoffs here: [P](#)

**Figure S2.** Summary of the statistics for the MolProbity assessment of the Tmprss2 model.

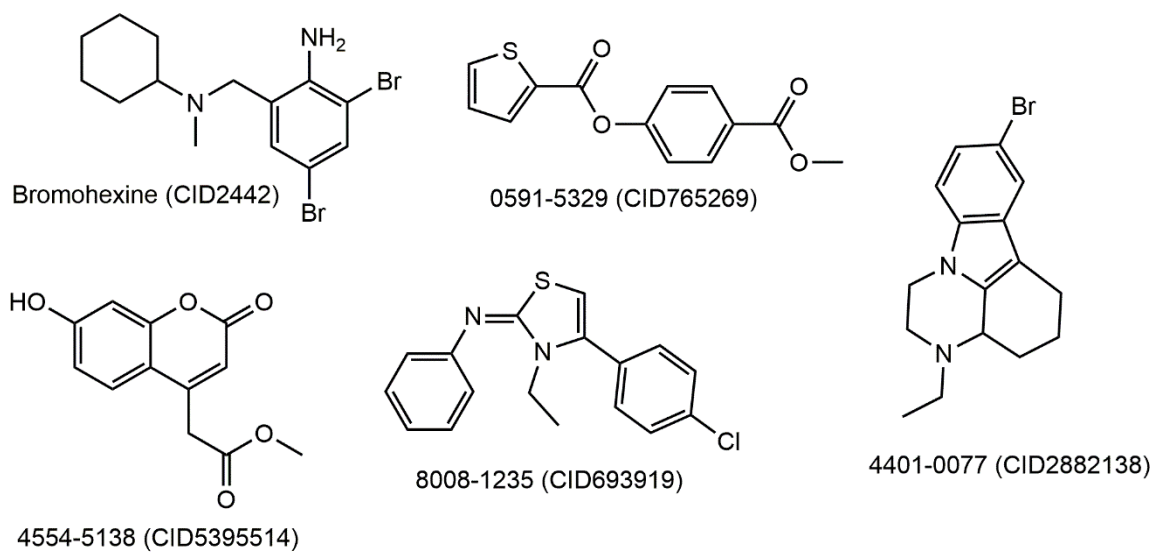

**Figure S3.** Five weak TMPRSS2 inhibitors used as control compounds in this study.

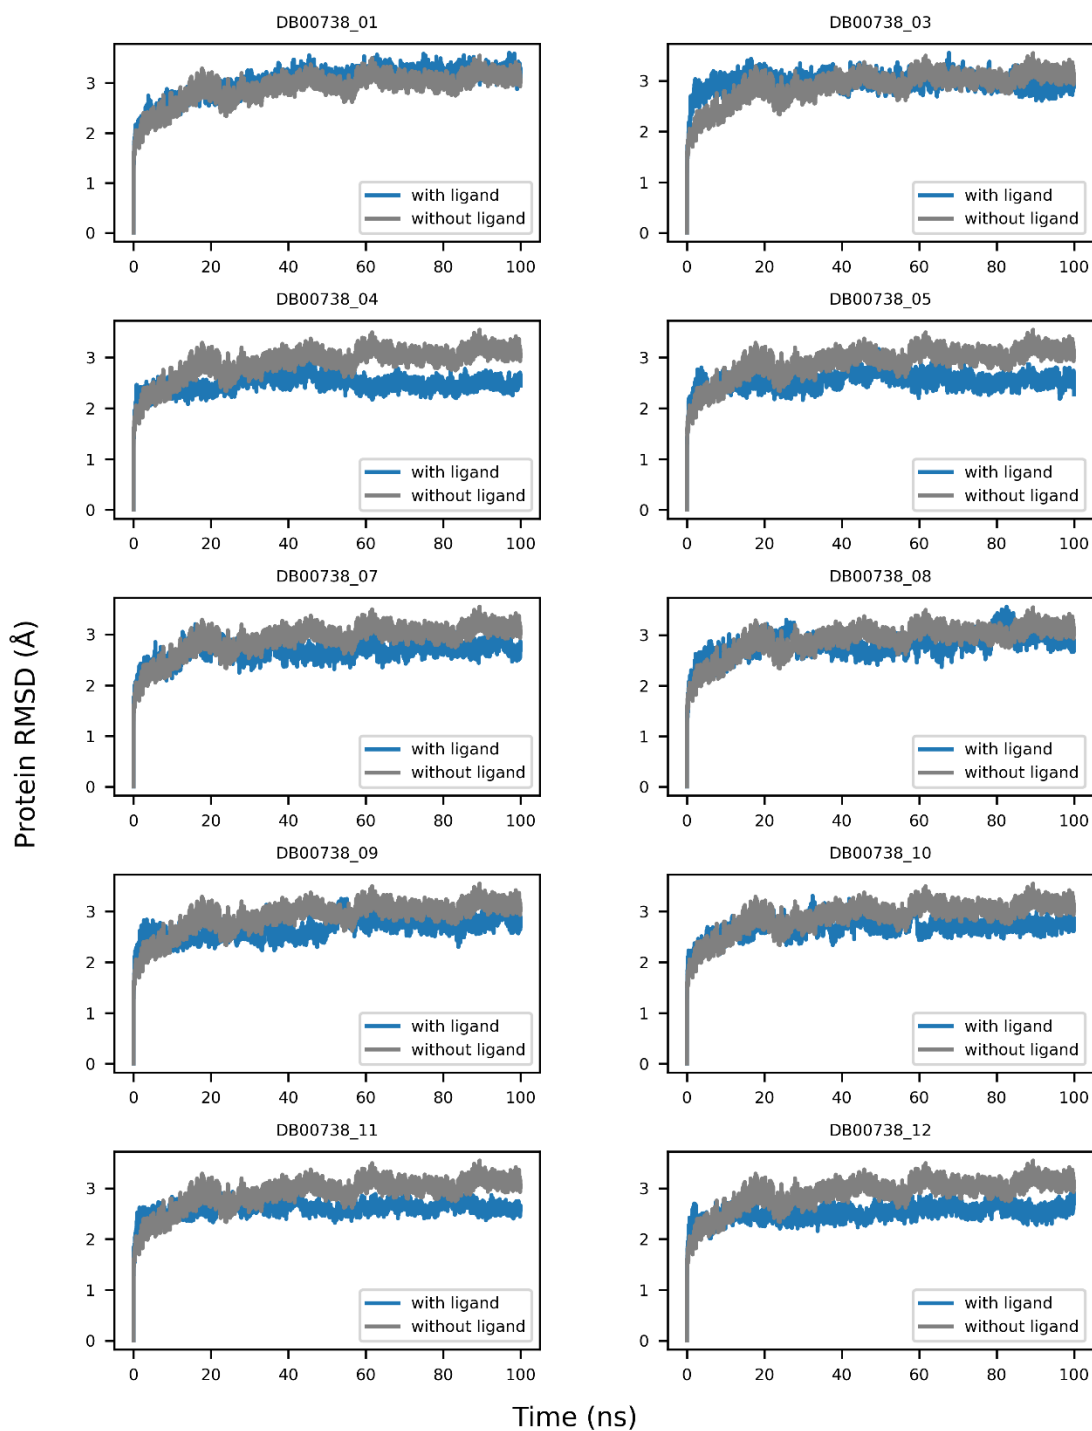

**Figure S4.** RMSD of TMRSS2 calculated from 100 ns molecular dynamics simulations for each compound with different poses. The apo-form TMRSS2 was simulated only once and its trajectory was used as a baseline for comparison.



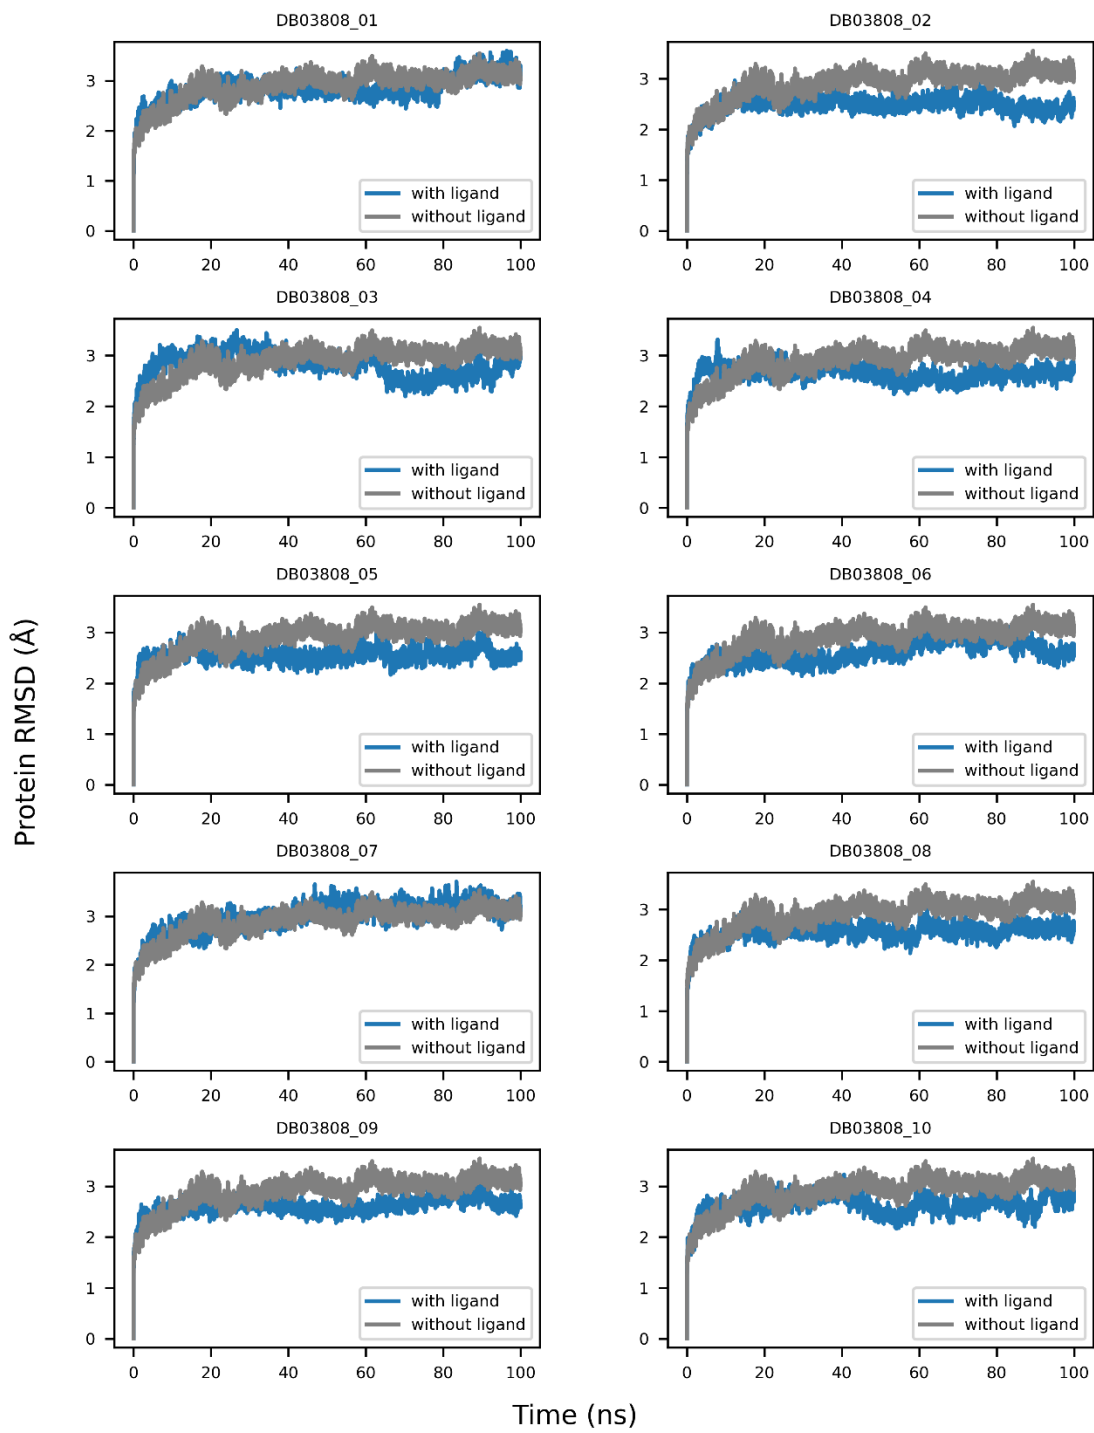

(Figure S4 continued)

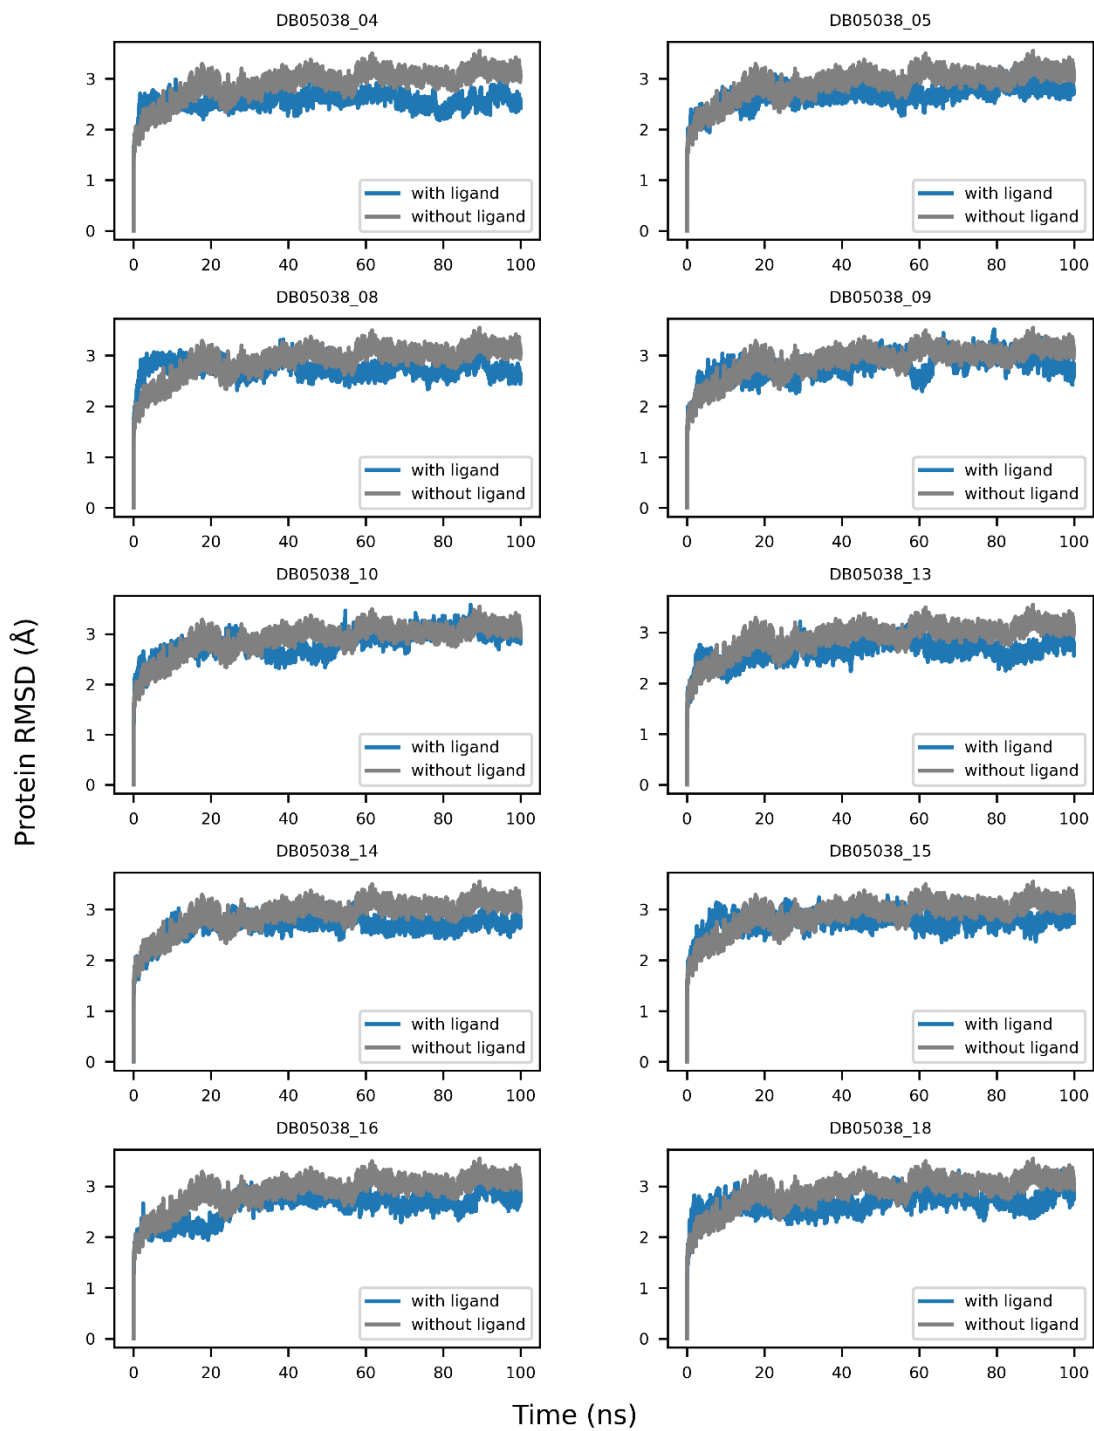

(Figure S4 continued)

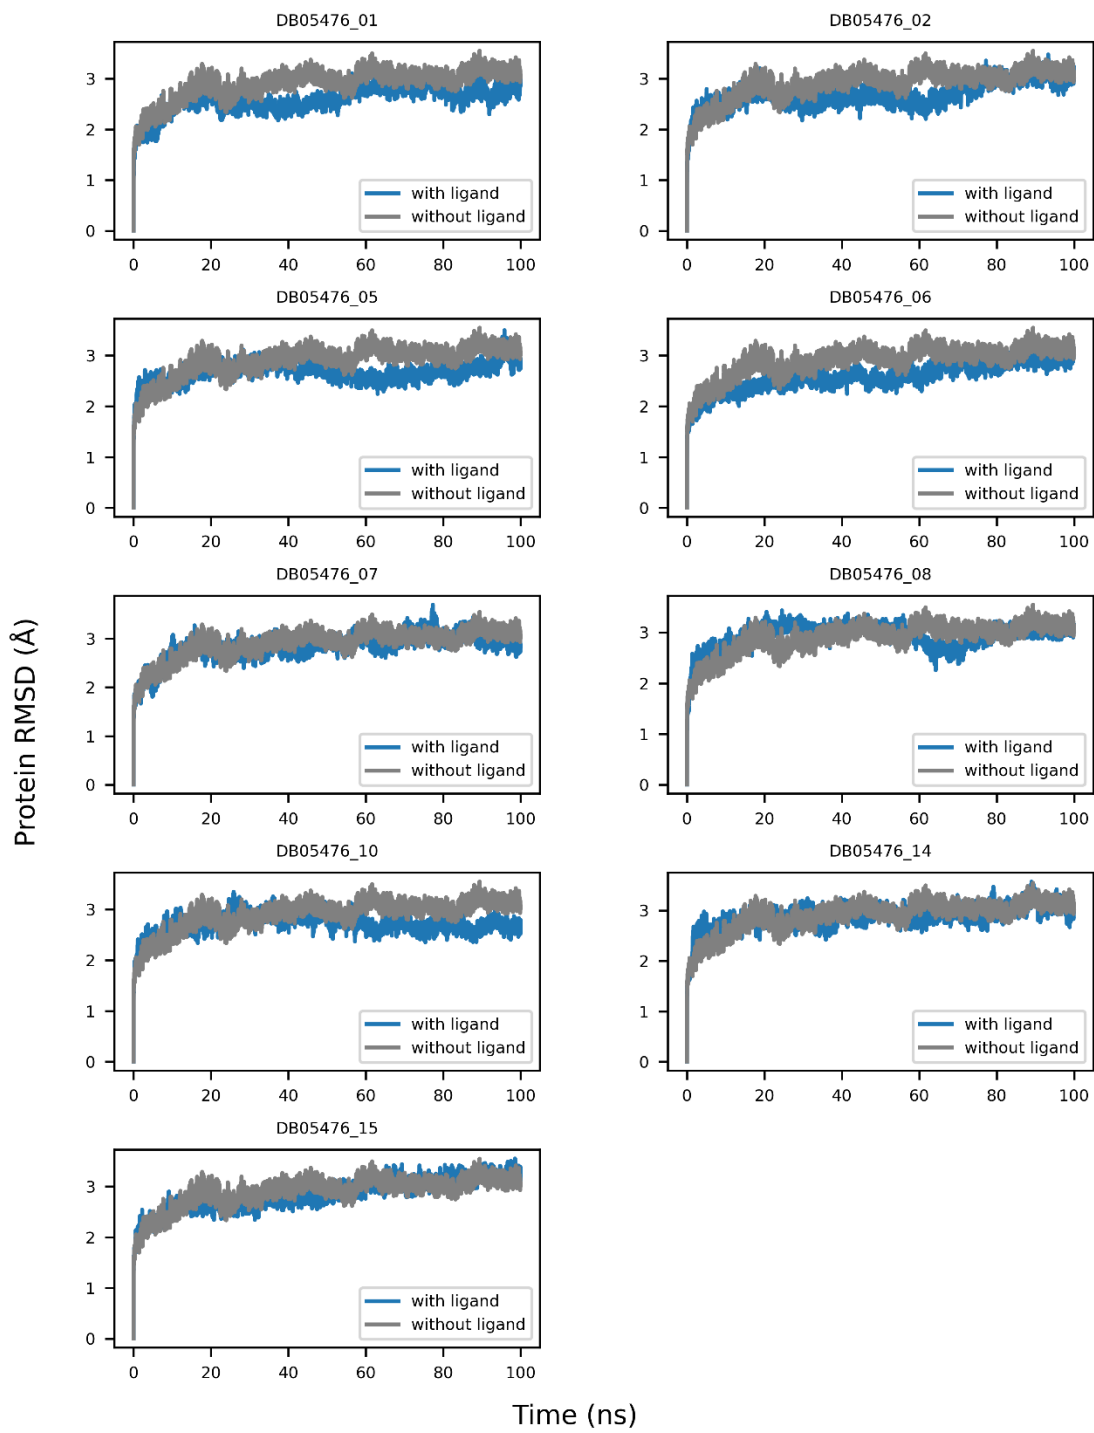

(Figure S4 continued)

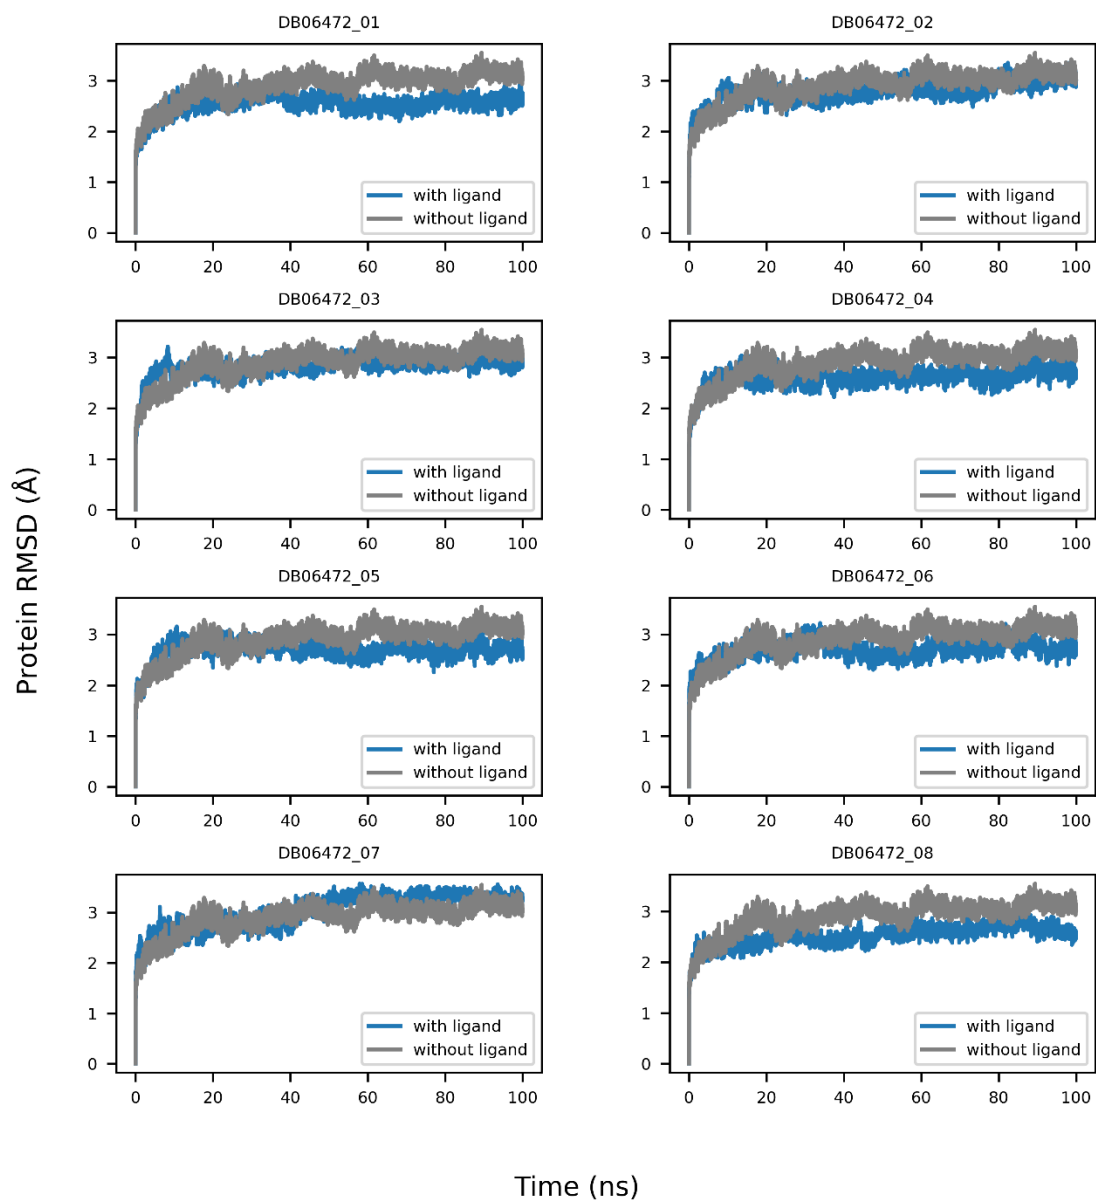

(Figure S4 continued)

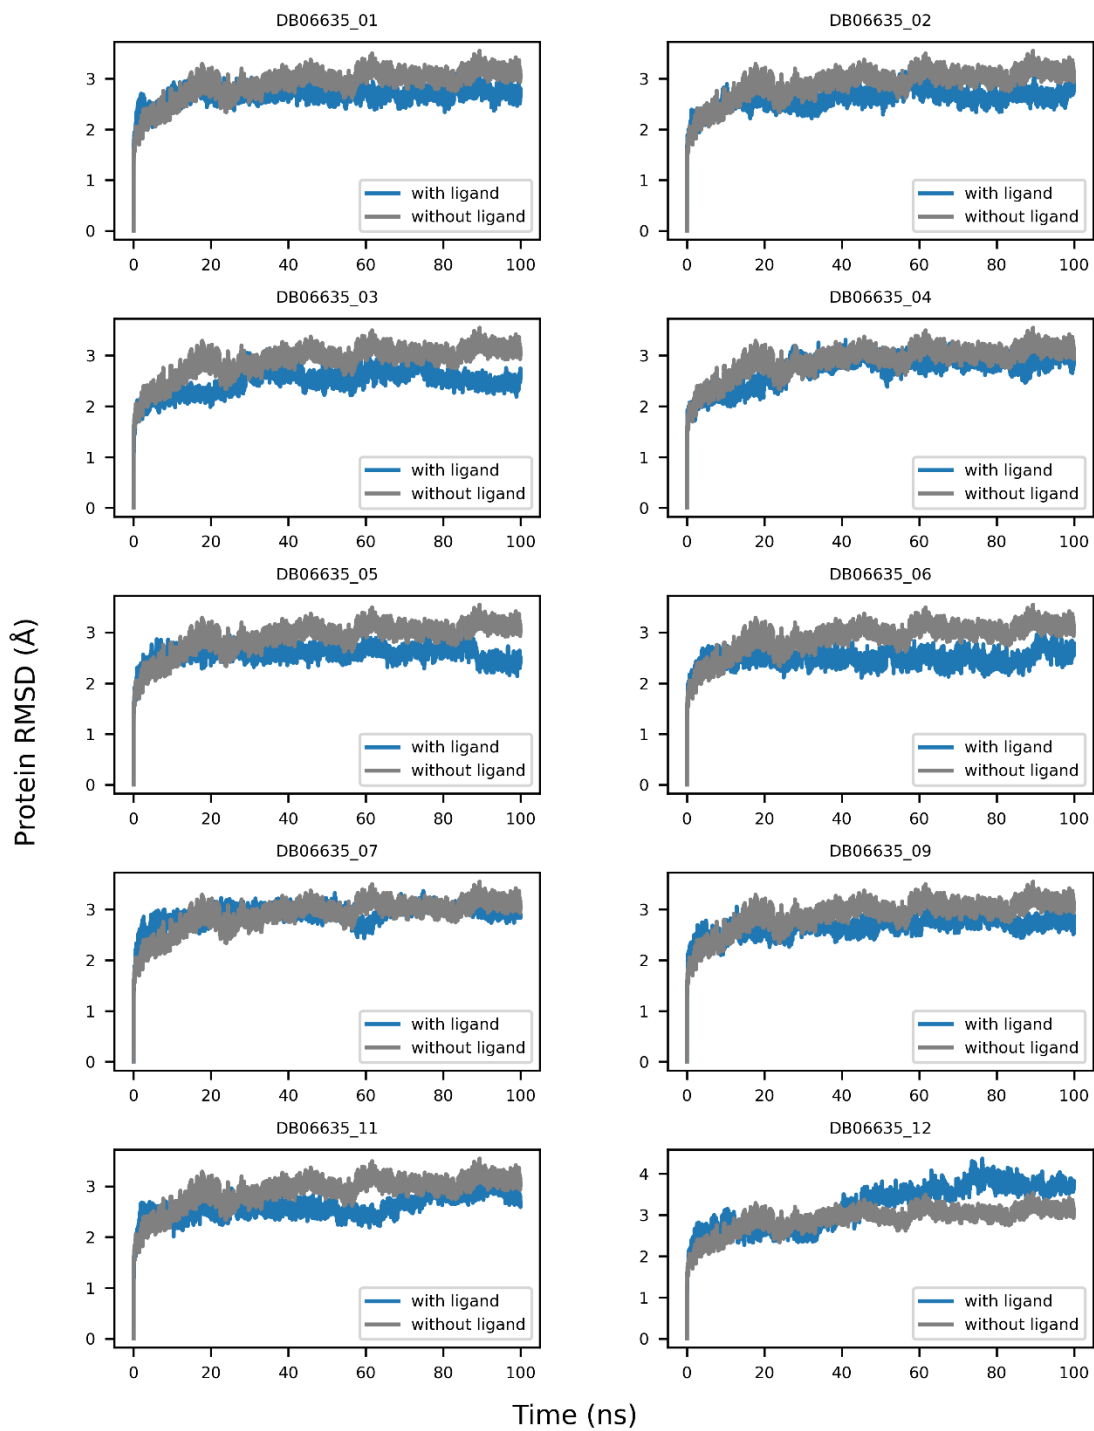

(Figure S4 continued)

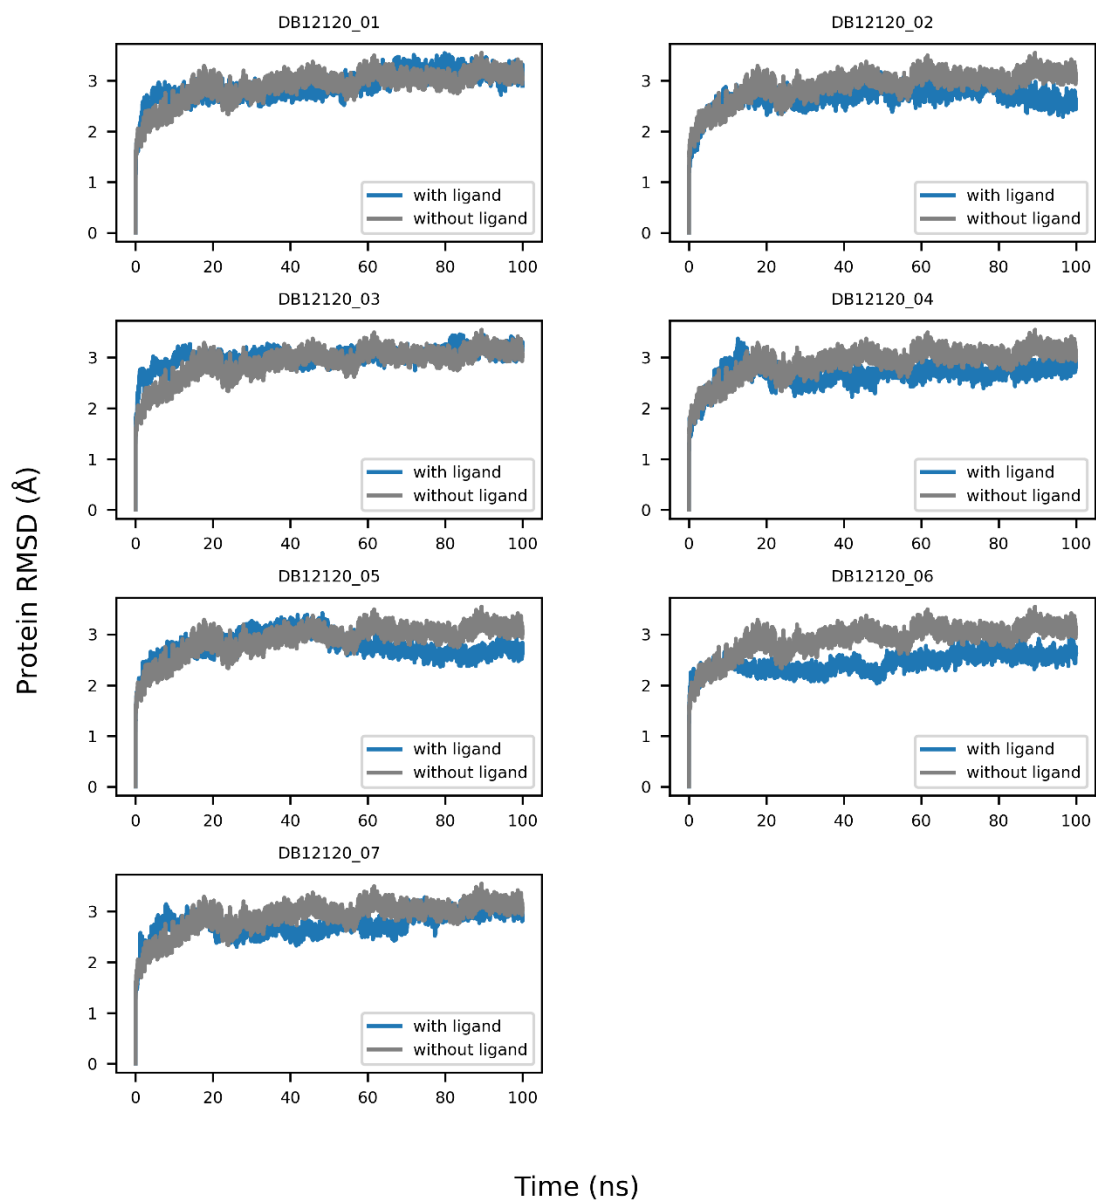

(Figure S4 continued)

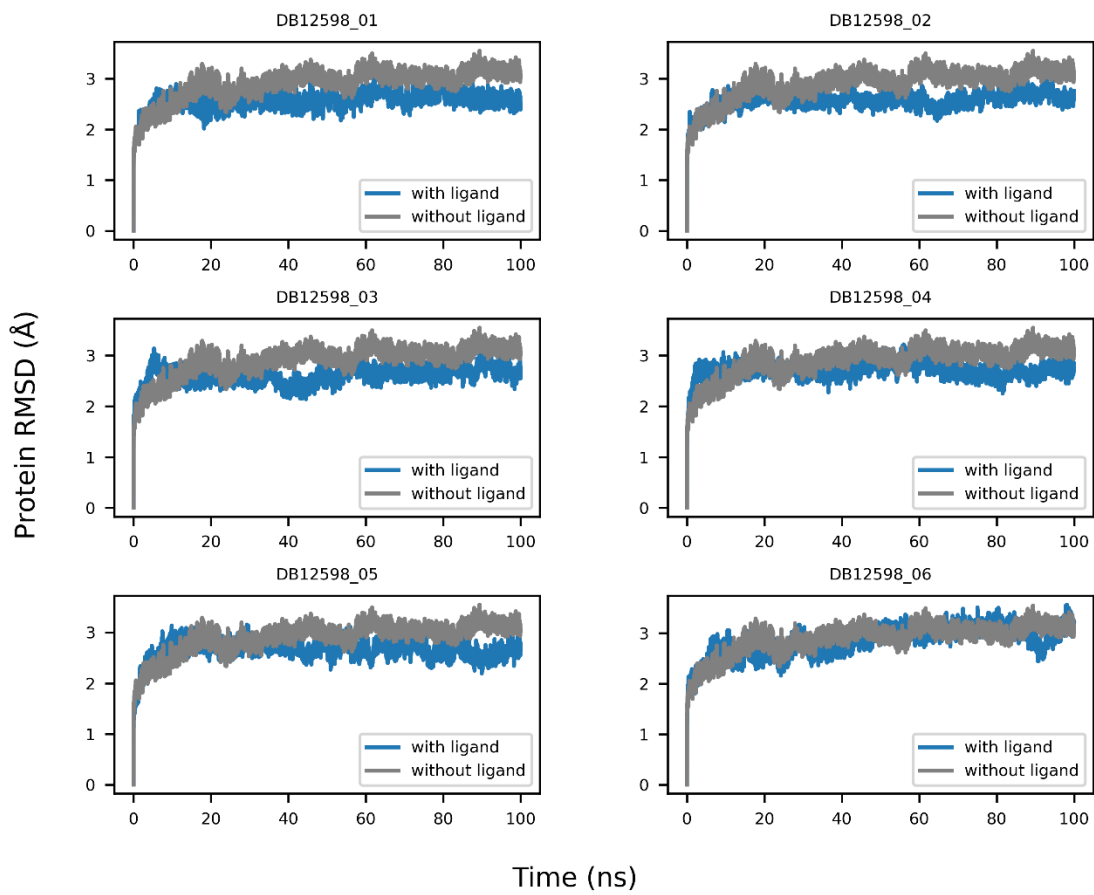

(Figure S4 continued)

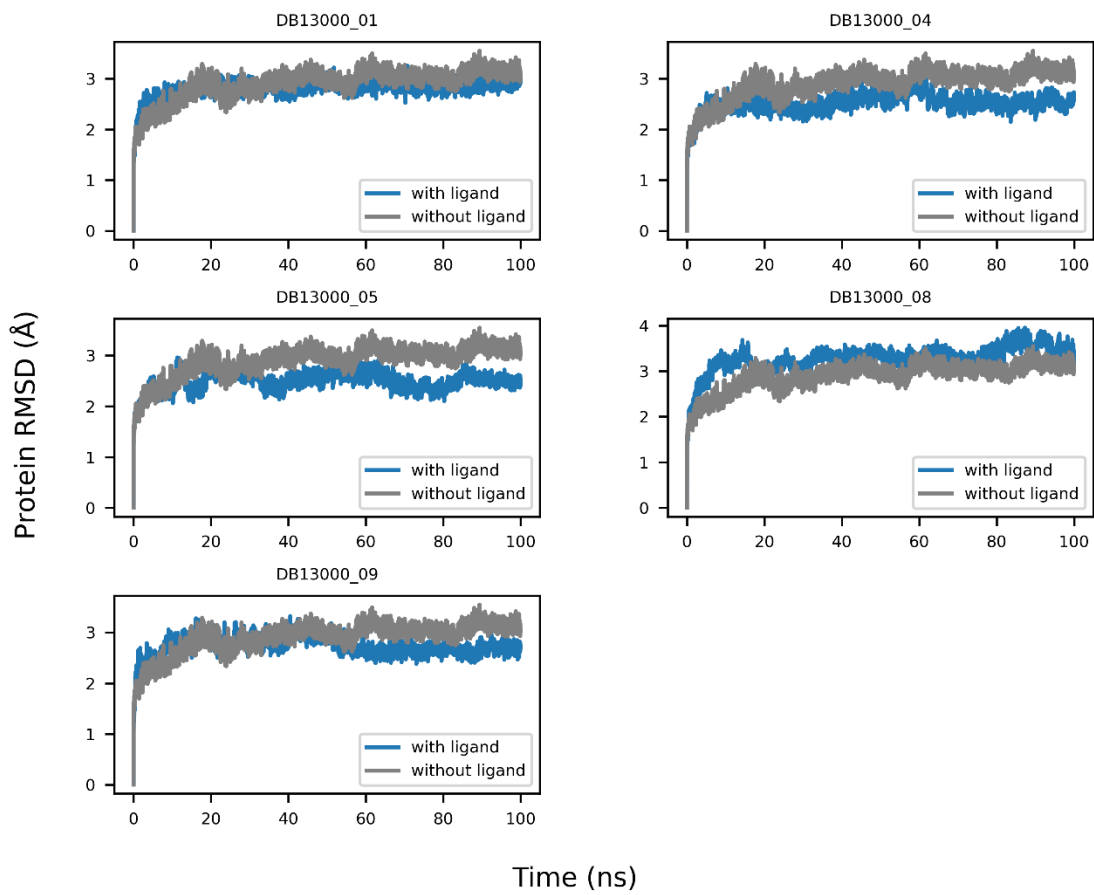

(Figure S4 continued)



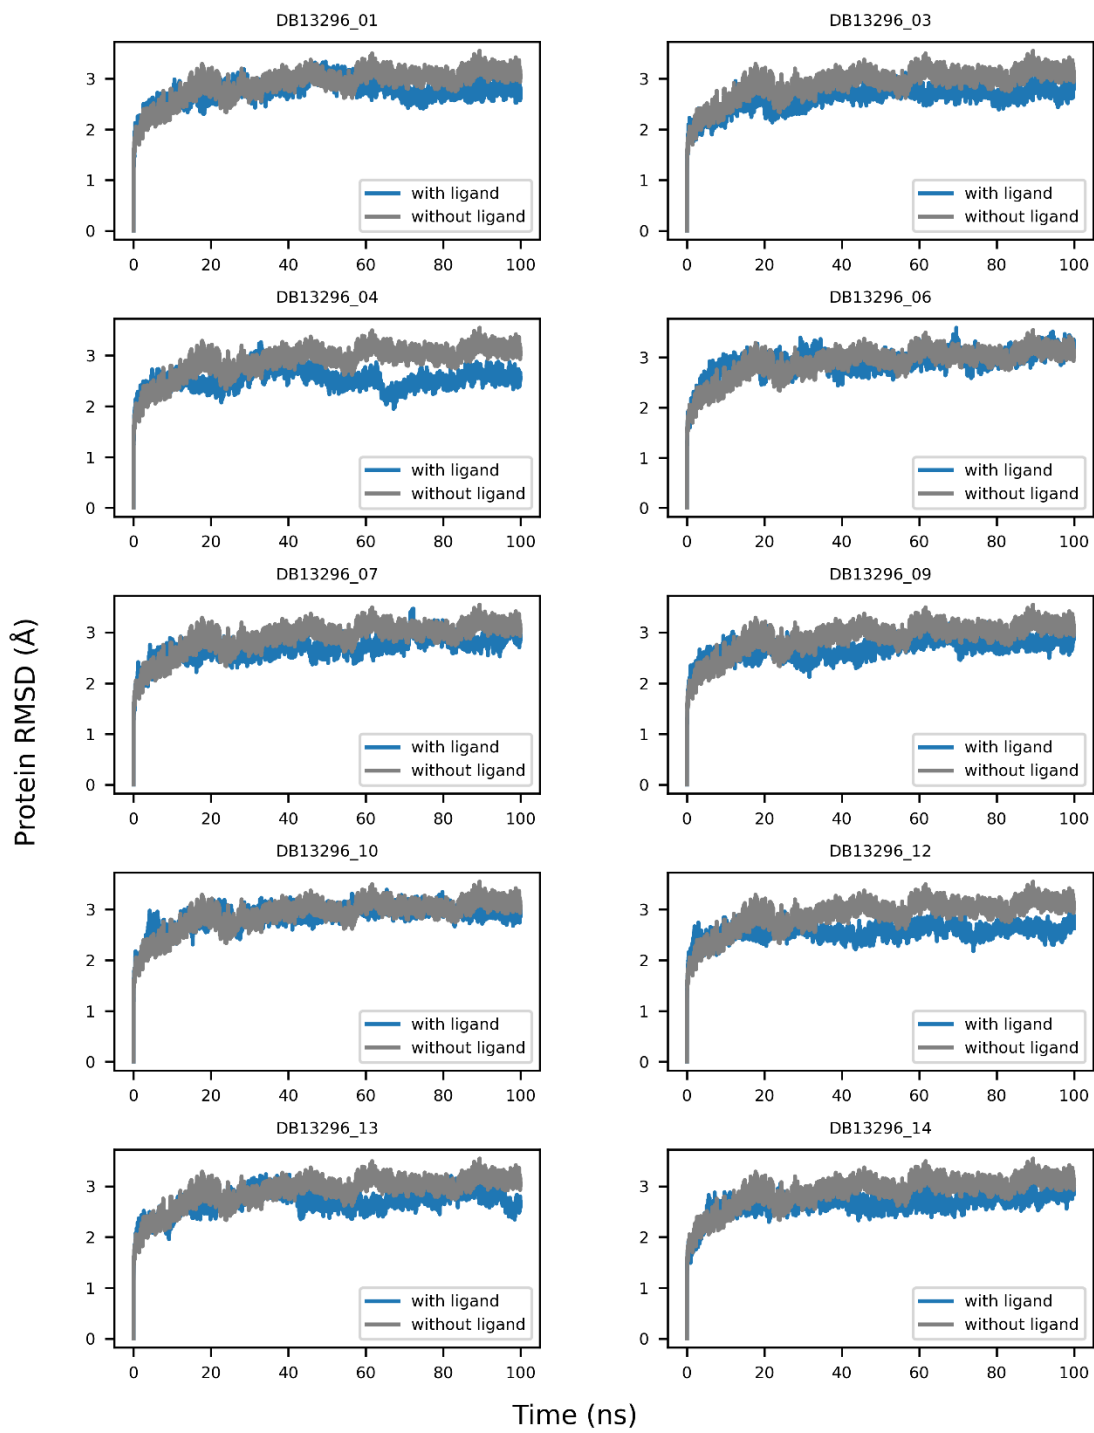

(Figure S4 continued)

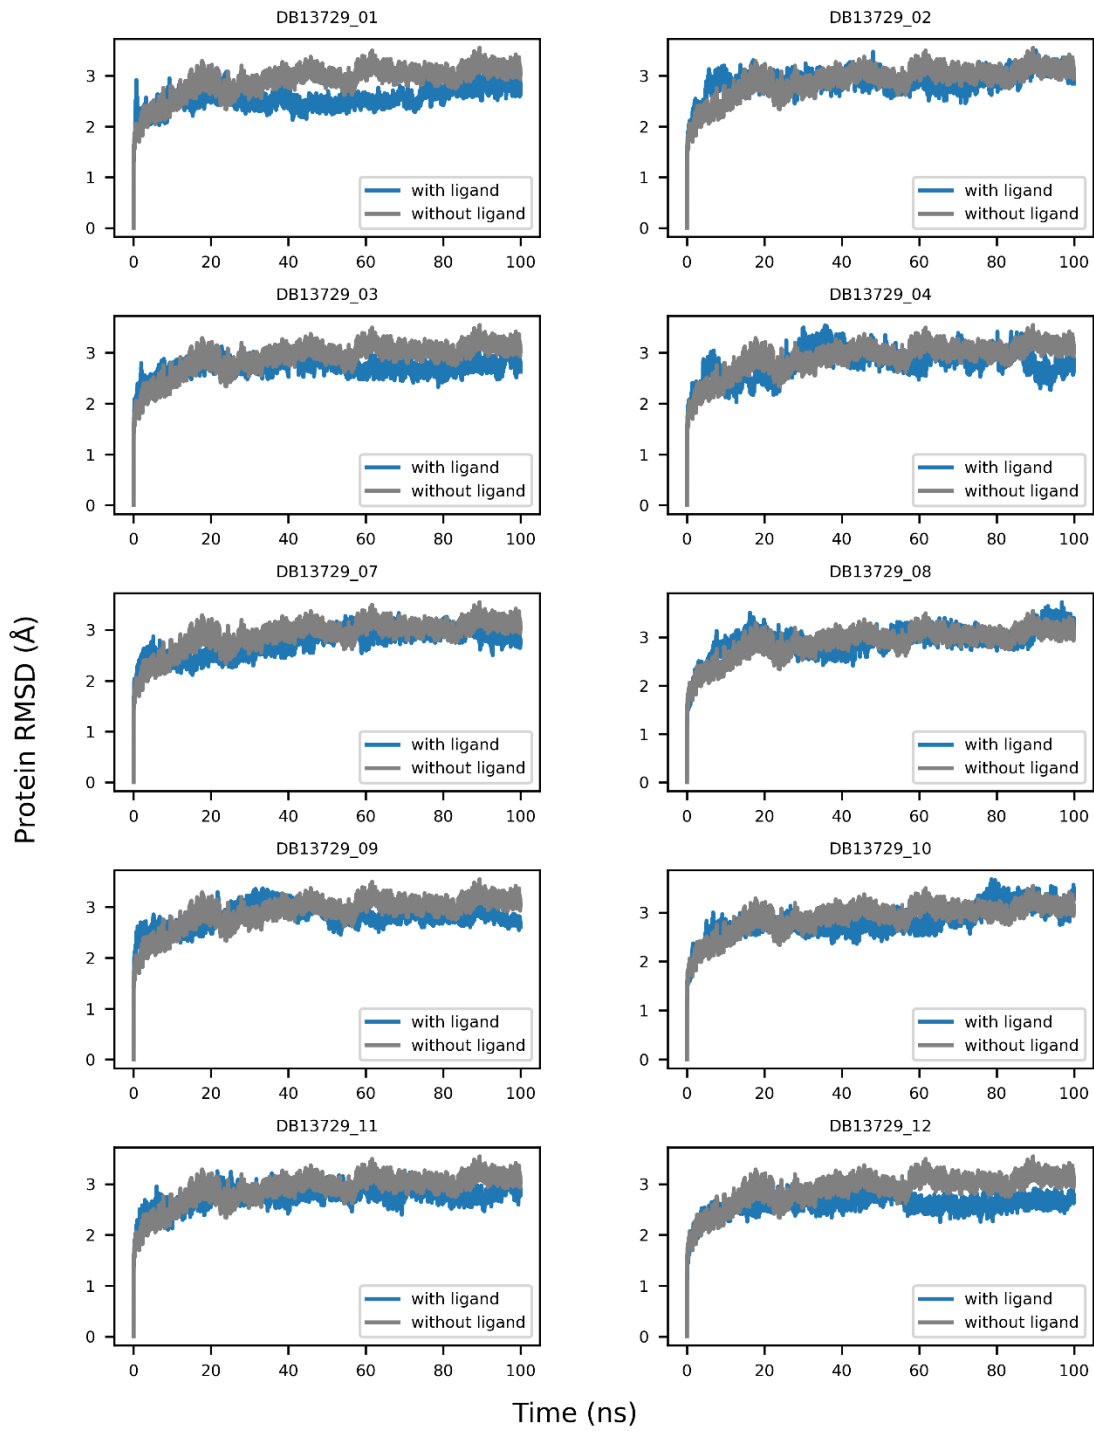

(Figure S4 continued)

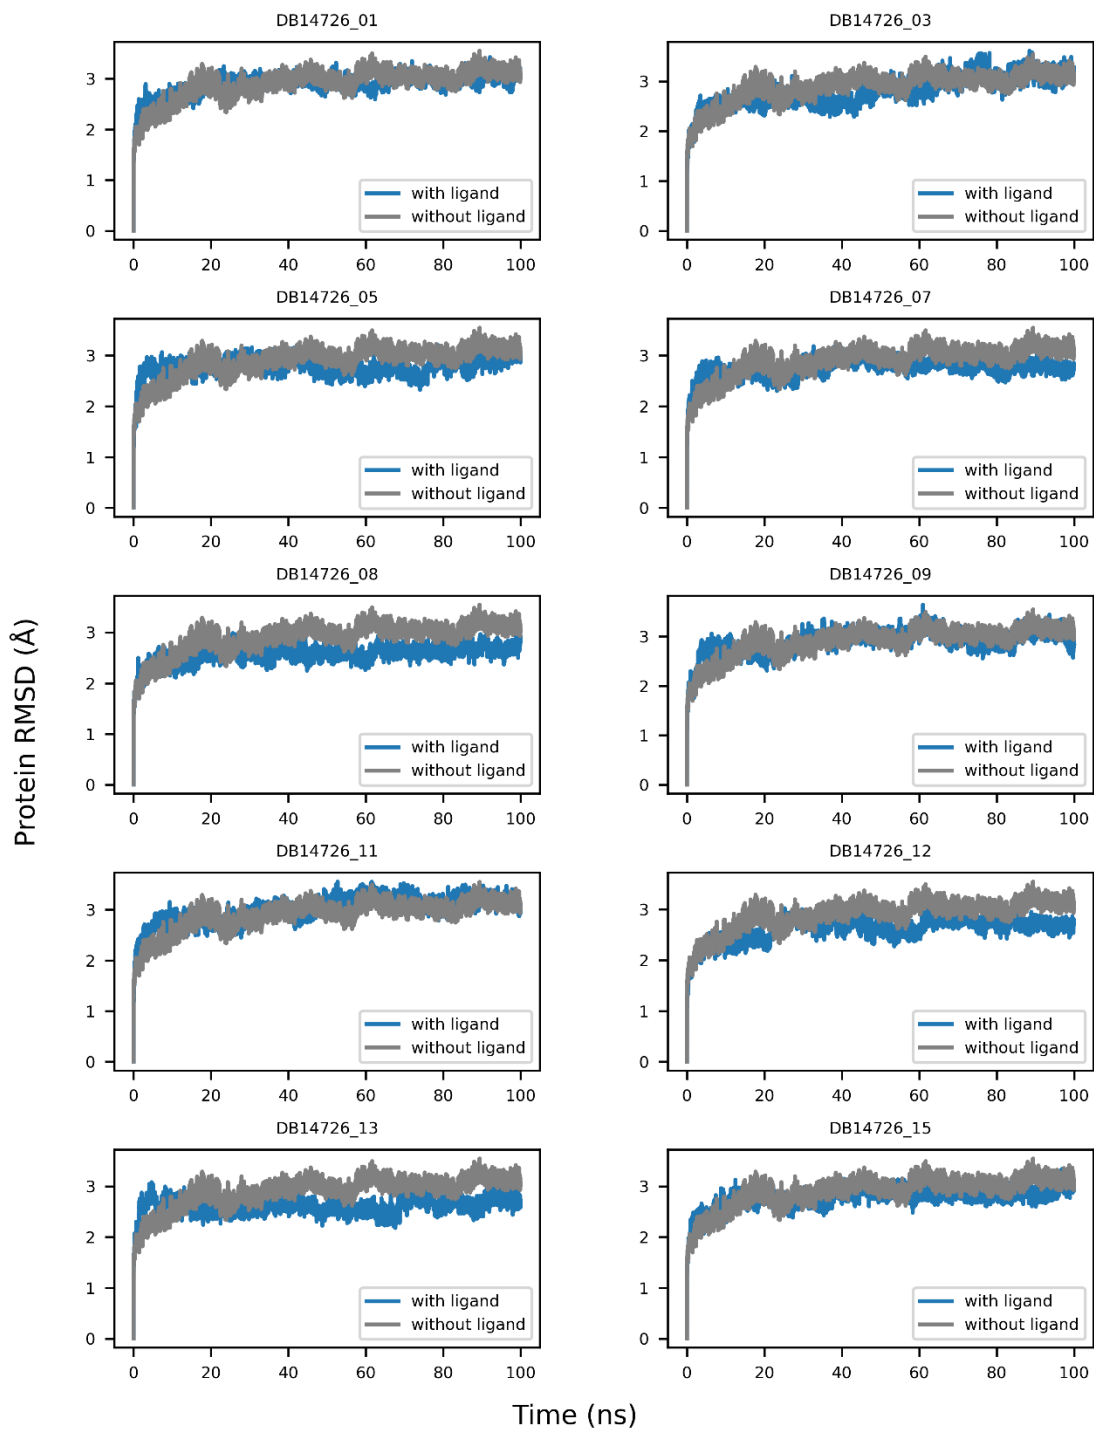

(Figure S4 continued)

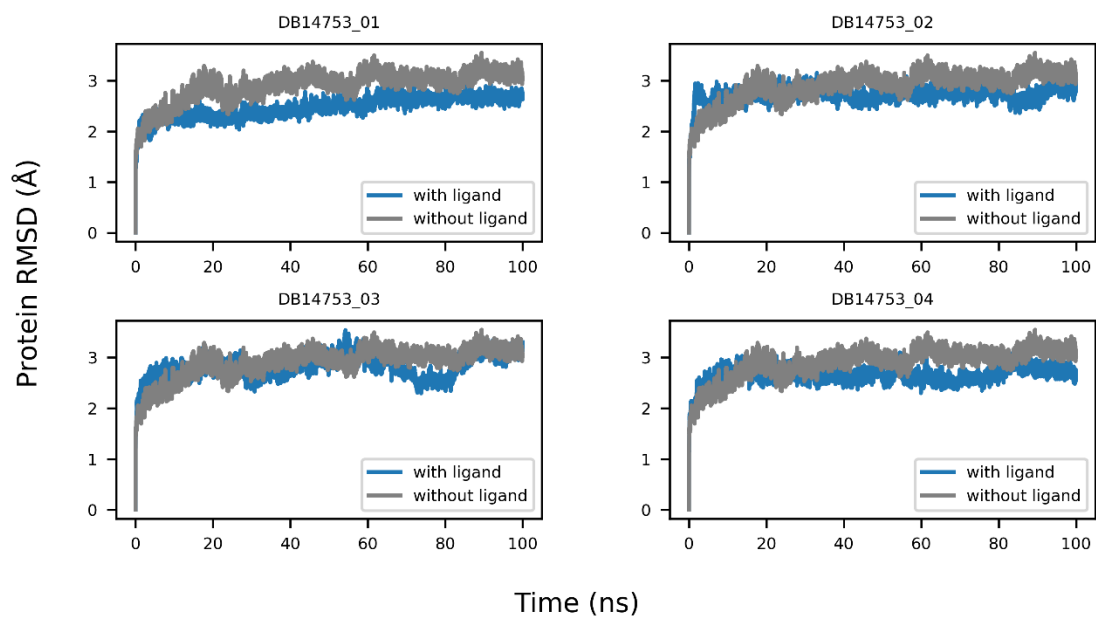

(Figure S4 continued)

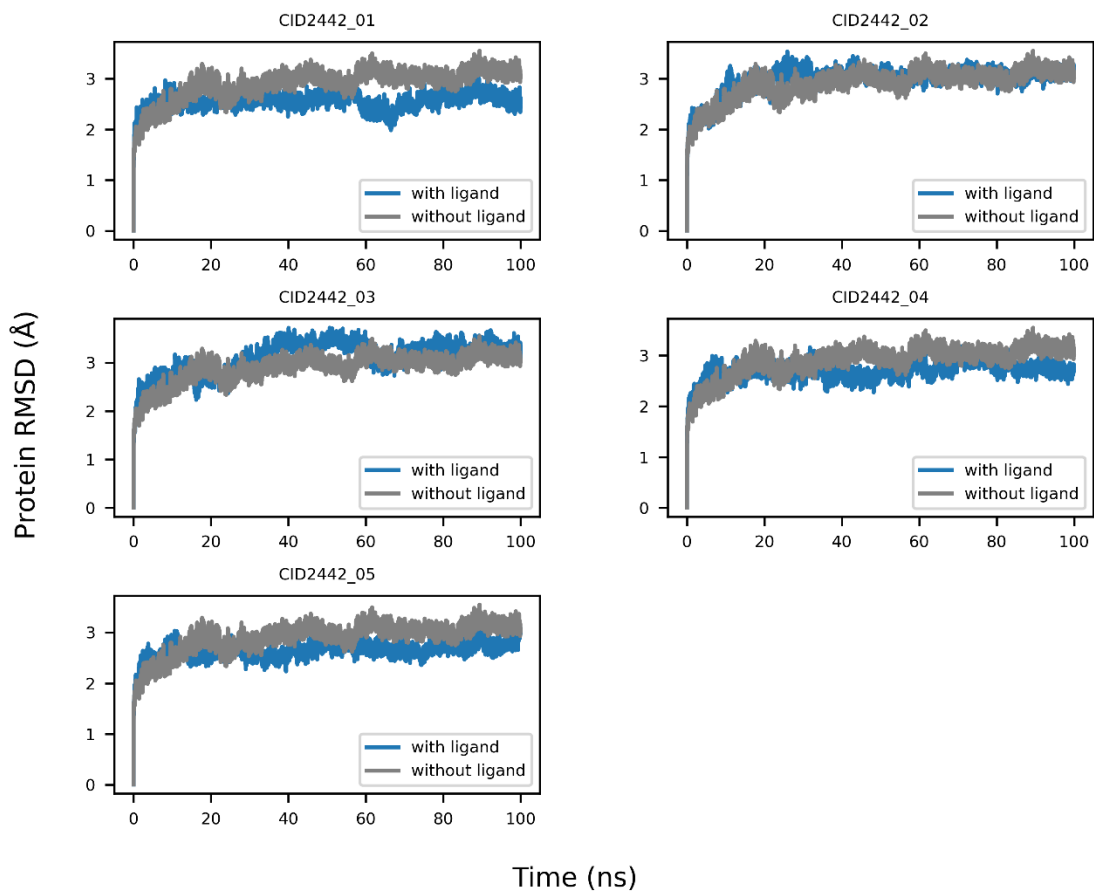

(Figure S4 continued)

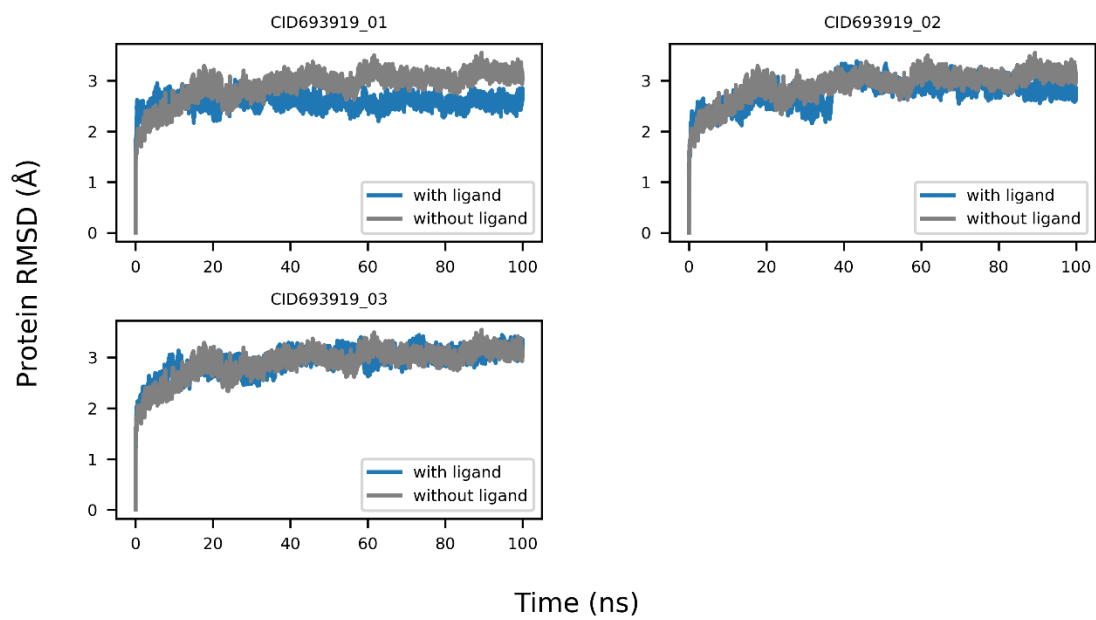

(Figure S4 continued)

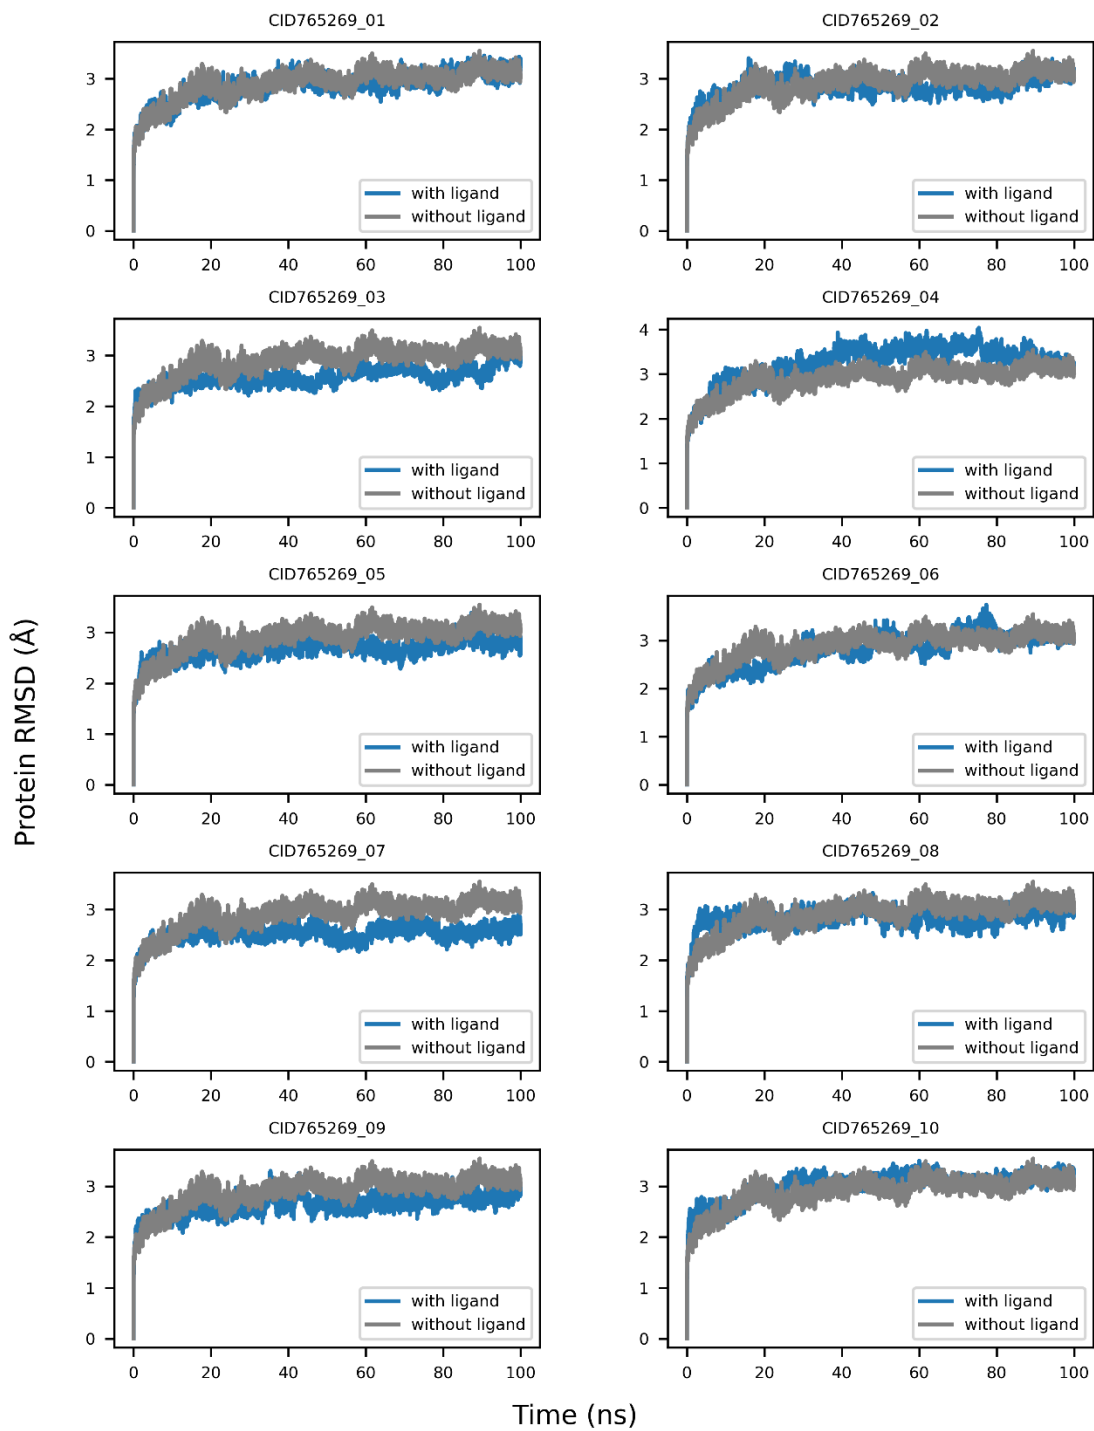

(Figure S4 continued)

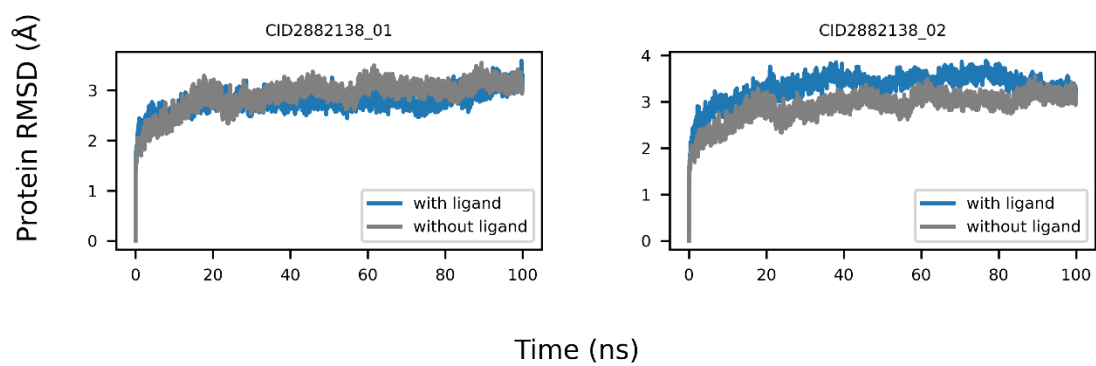

(Figure S4 continued)



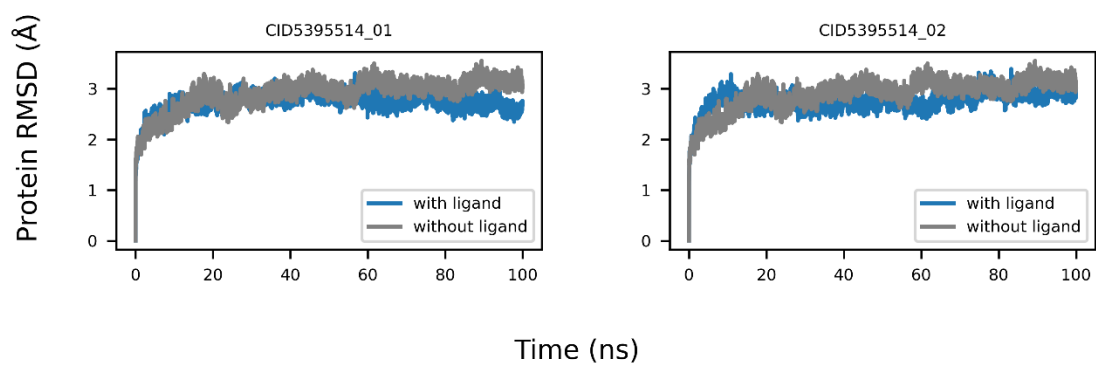

(Figure S4 continued)

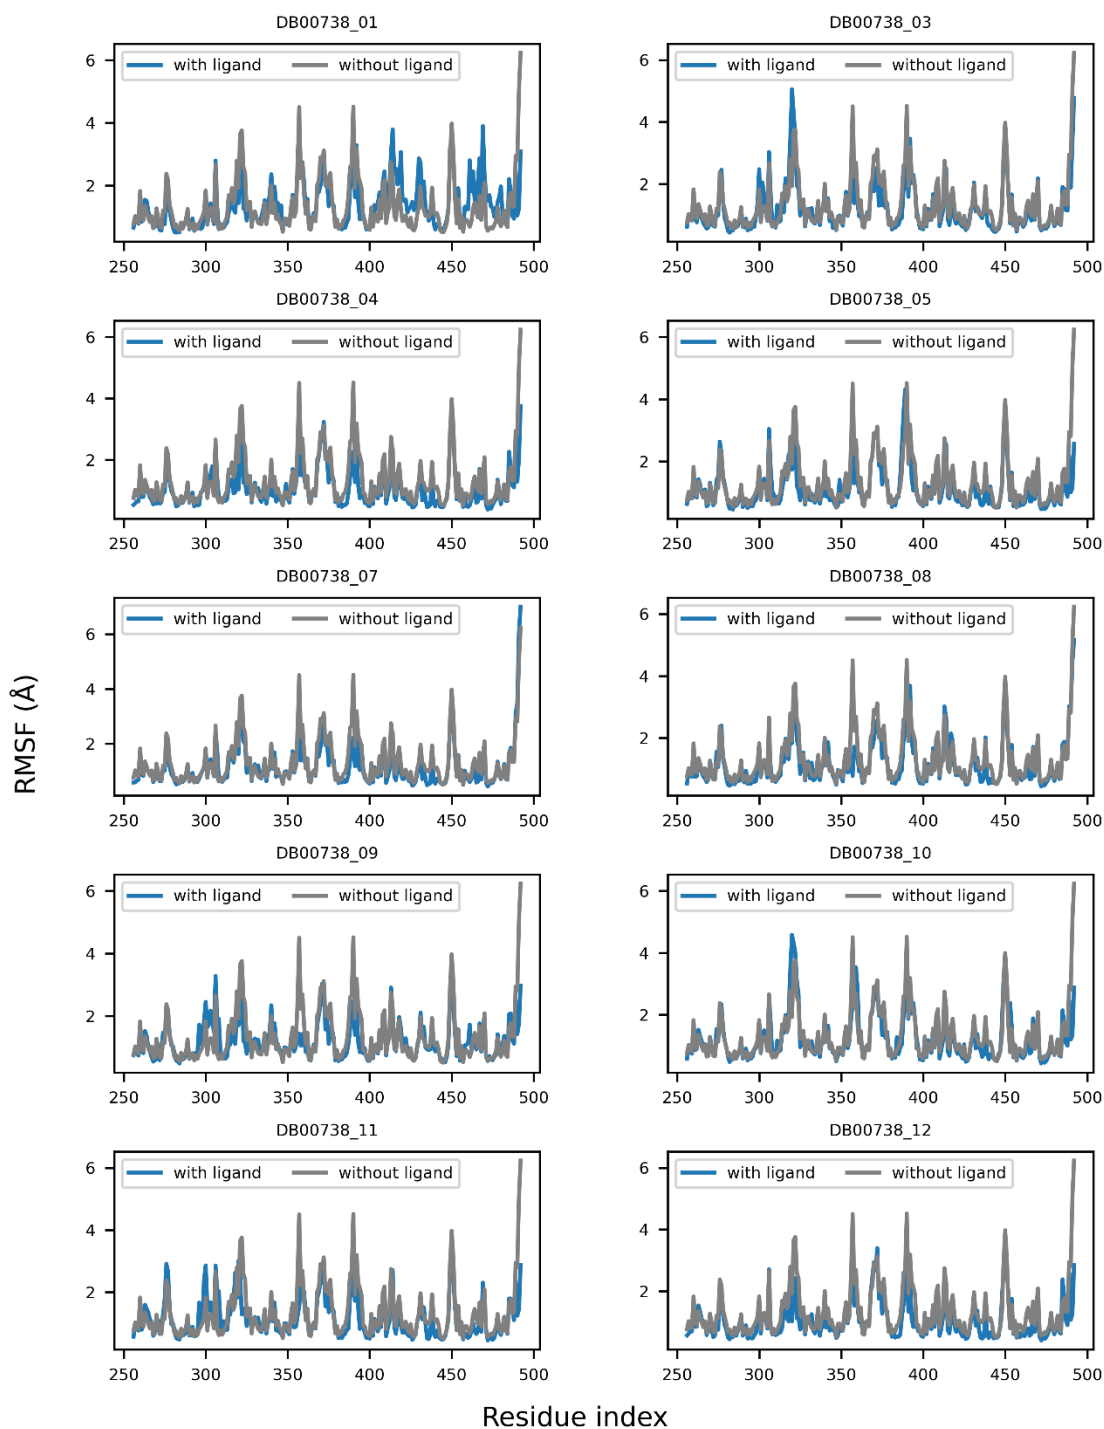

**Figure S5.** RMSF of Tmprss2 residues calculated from 100 ns molecular dynamics simulations for each compound with different poses. The apo-form Tmprss2 was simulated only once and its trajectory was used as a baseline for comparison. The residues with high flexibility (> 3 Å), Met320, Phe321, Phe357, Lys390, Asn450, and Gly492, are distant from the binding pocket.

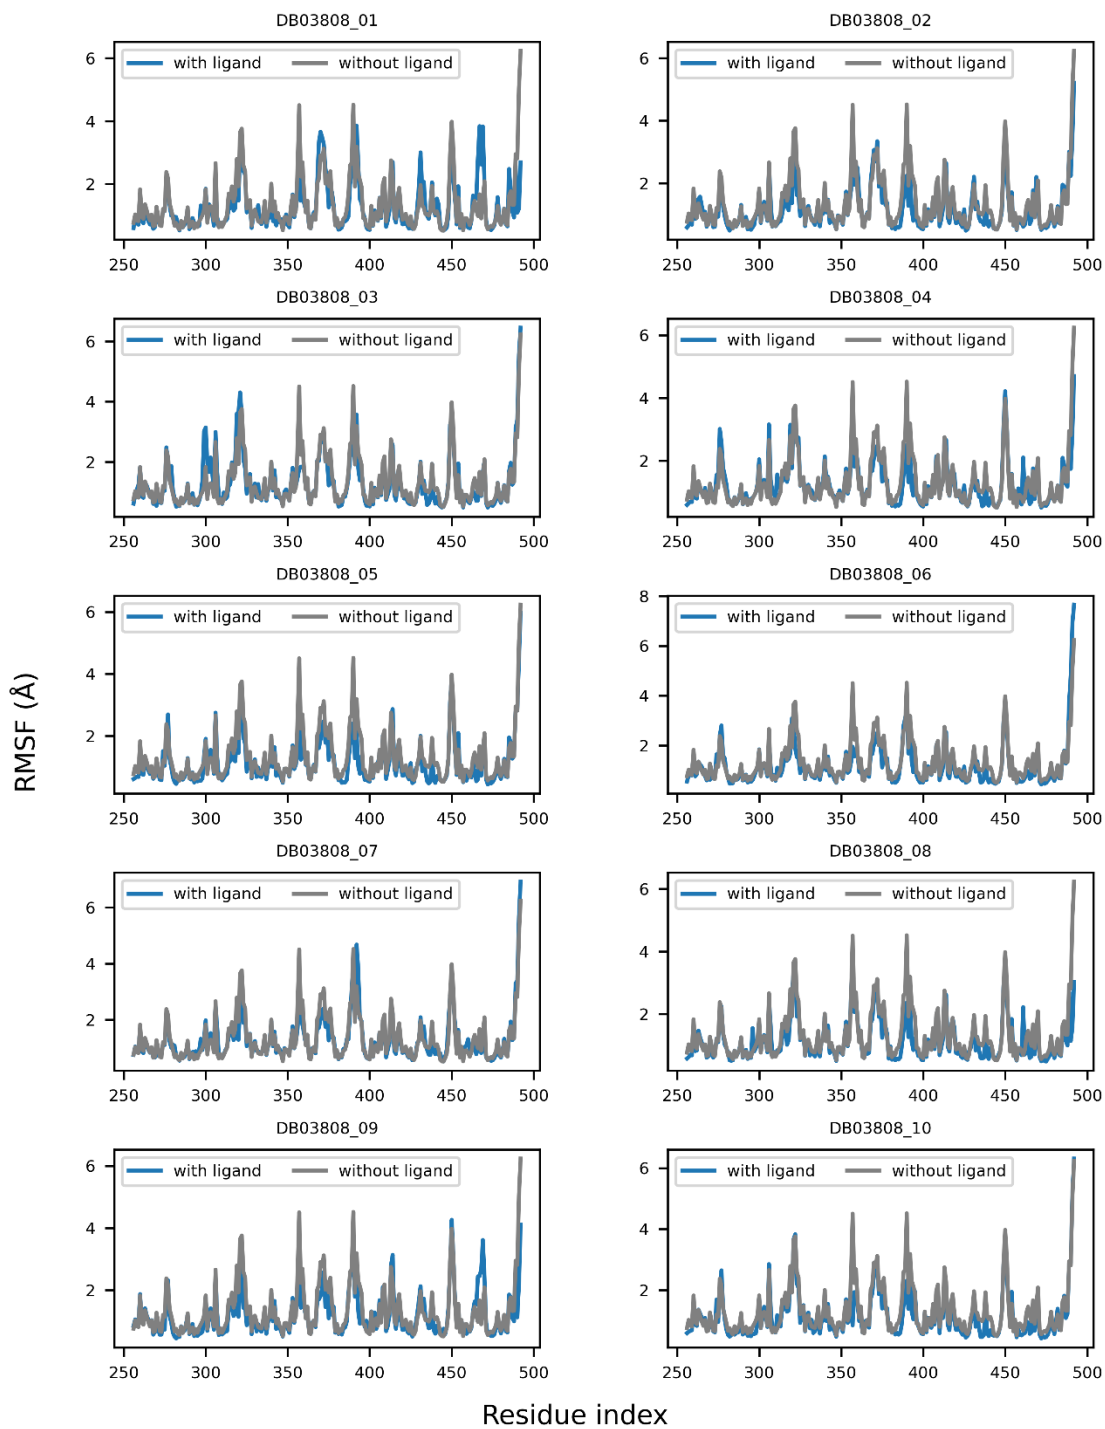

(Figure S5 continued)

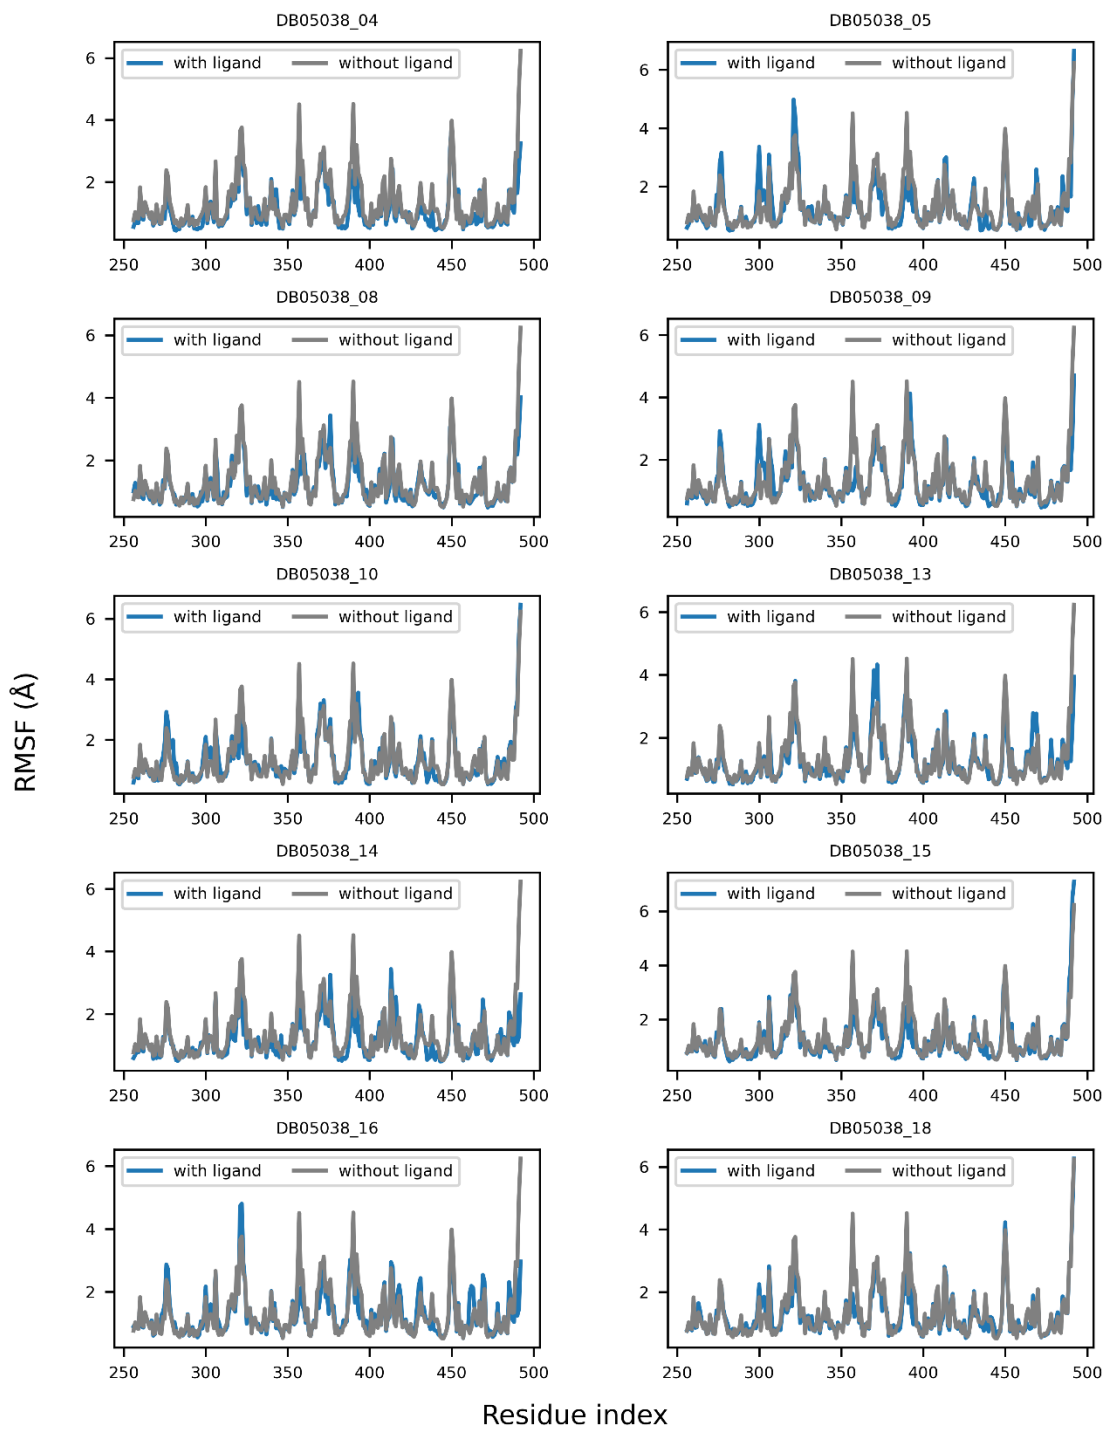

(Figure S5 continued)

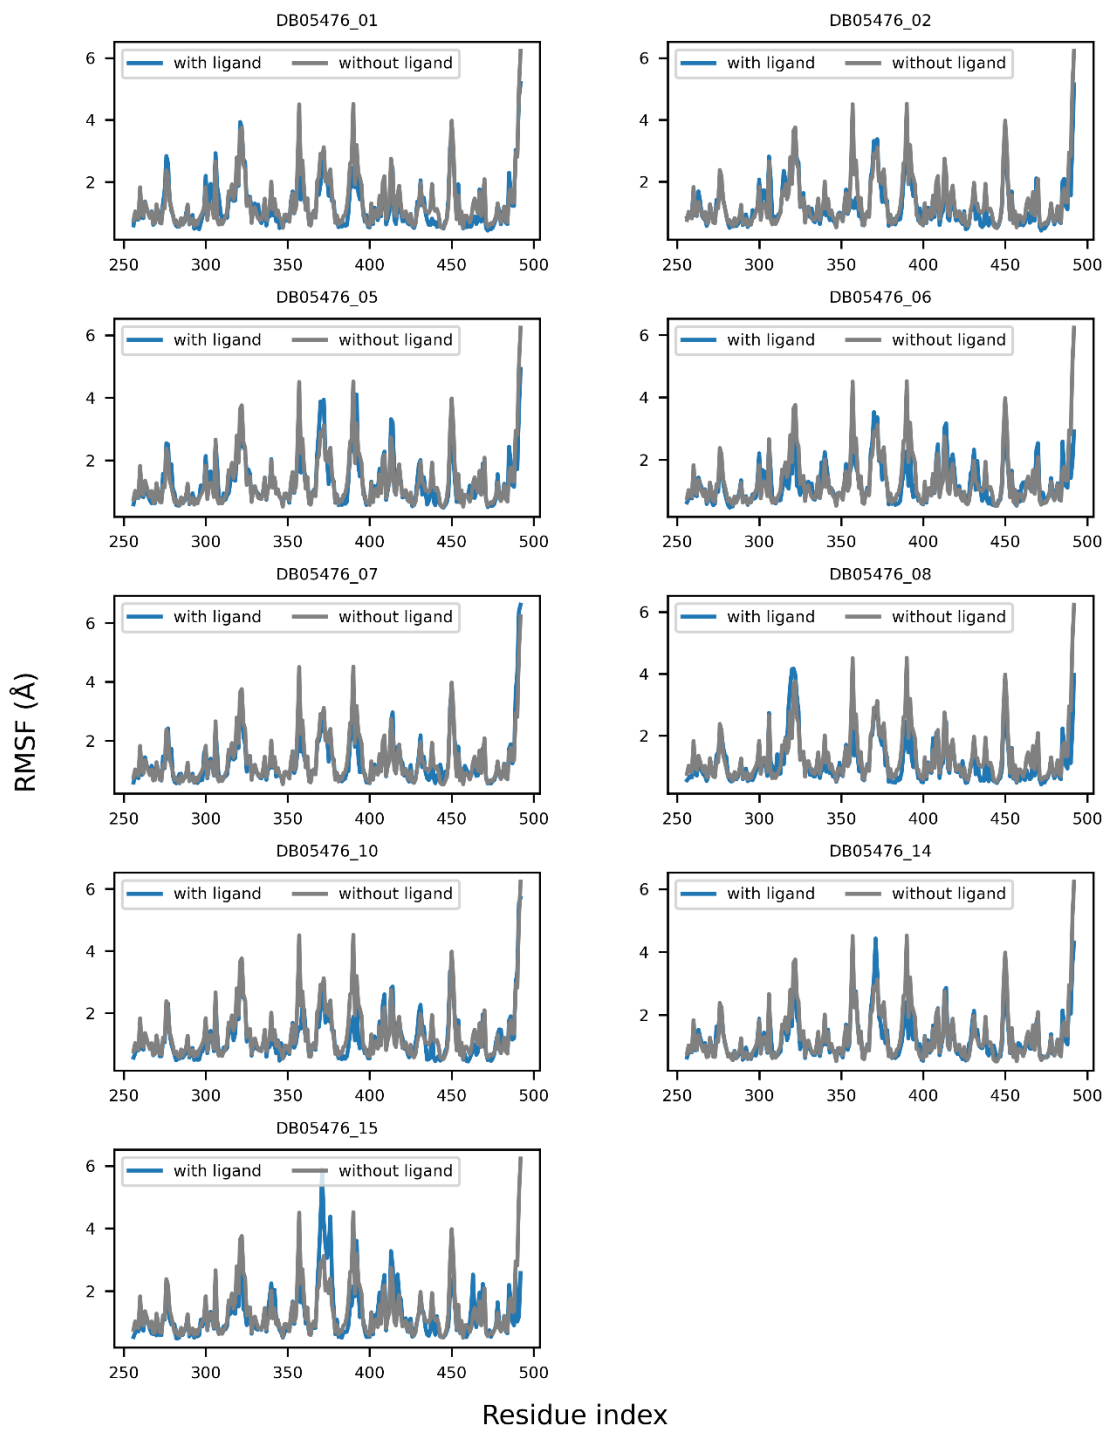

(Figure S5 continued)

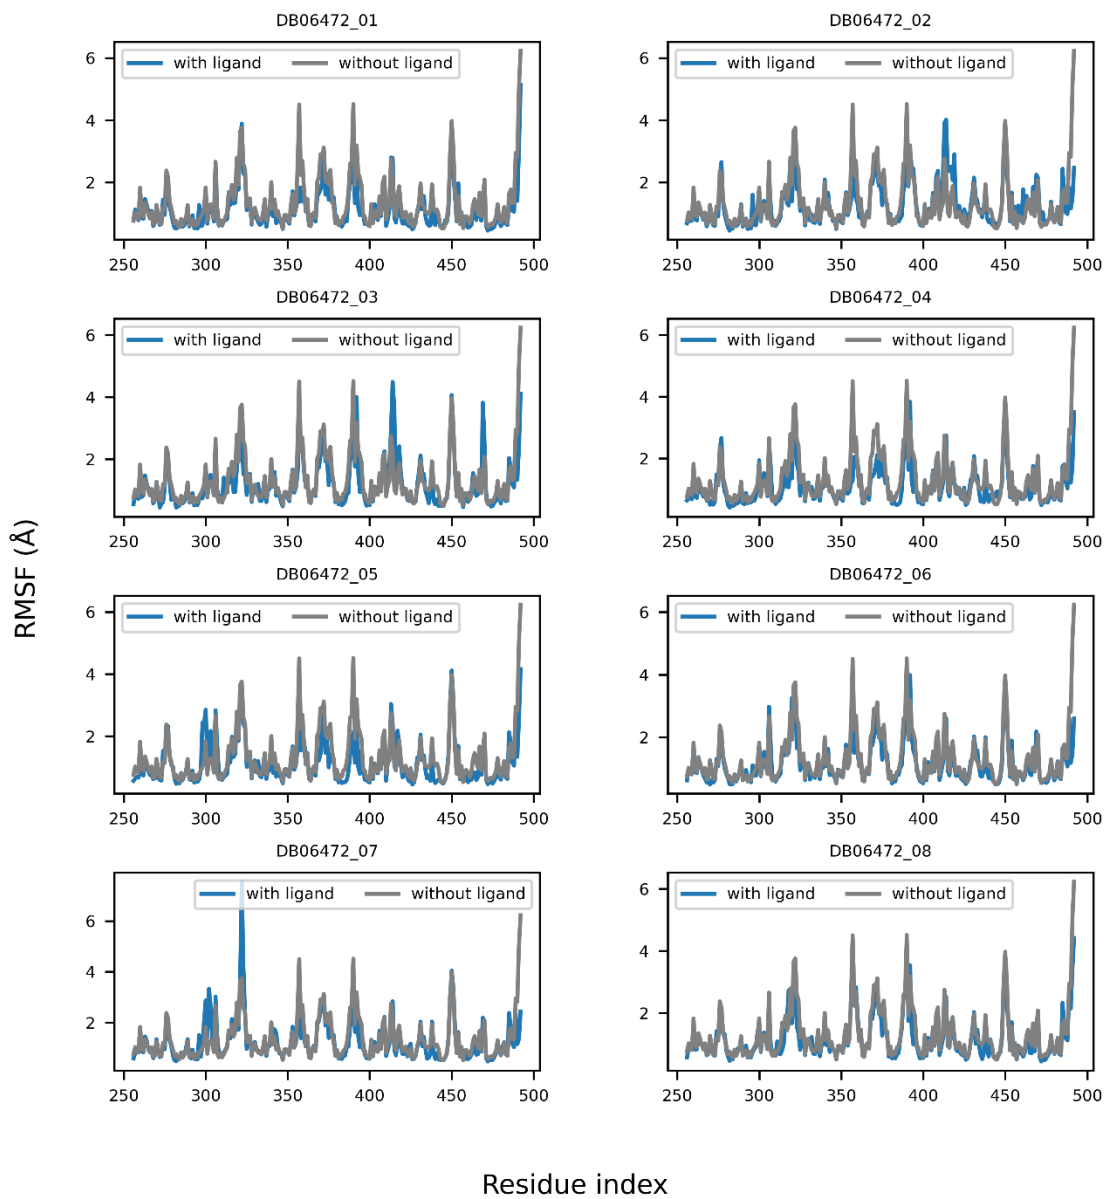

(Figure S5 continued)

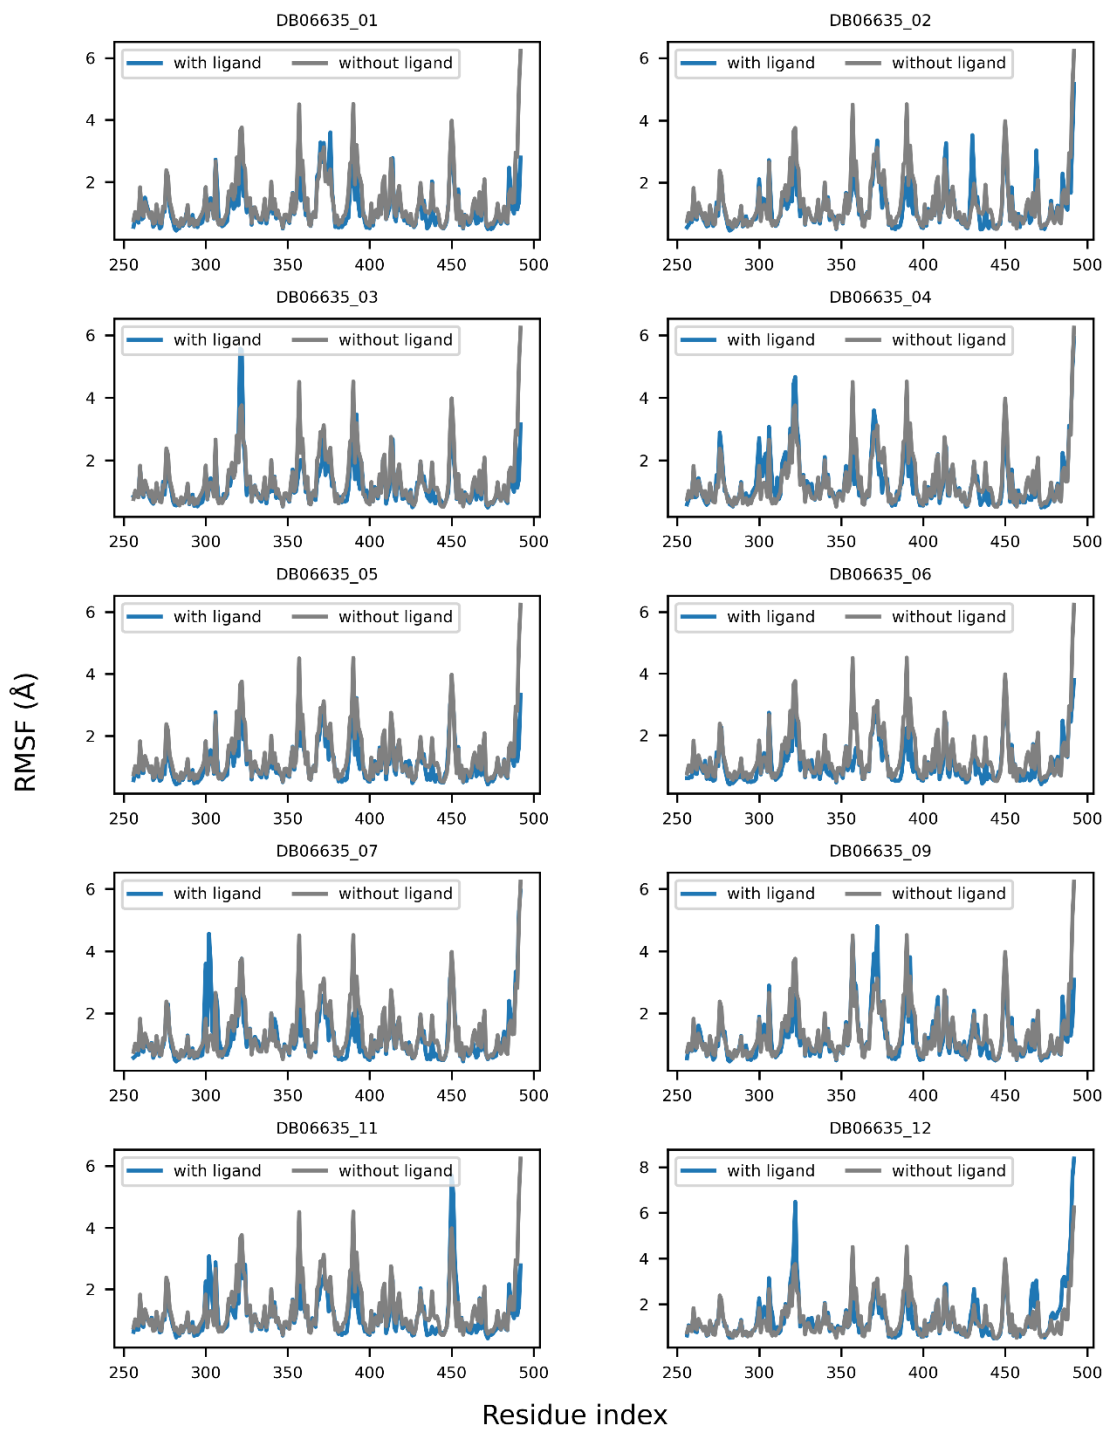

(Figure S5 continued)

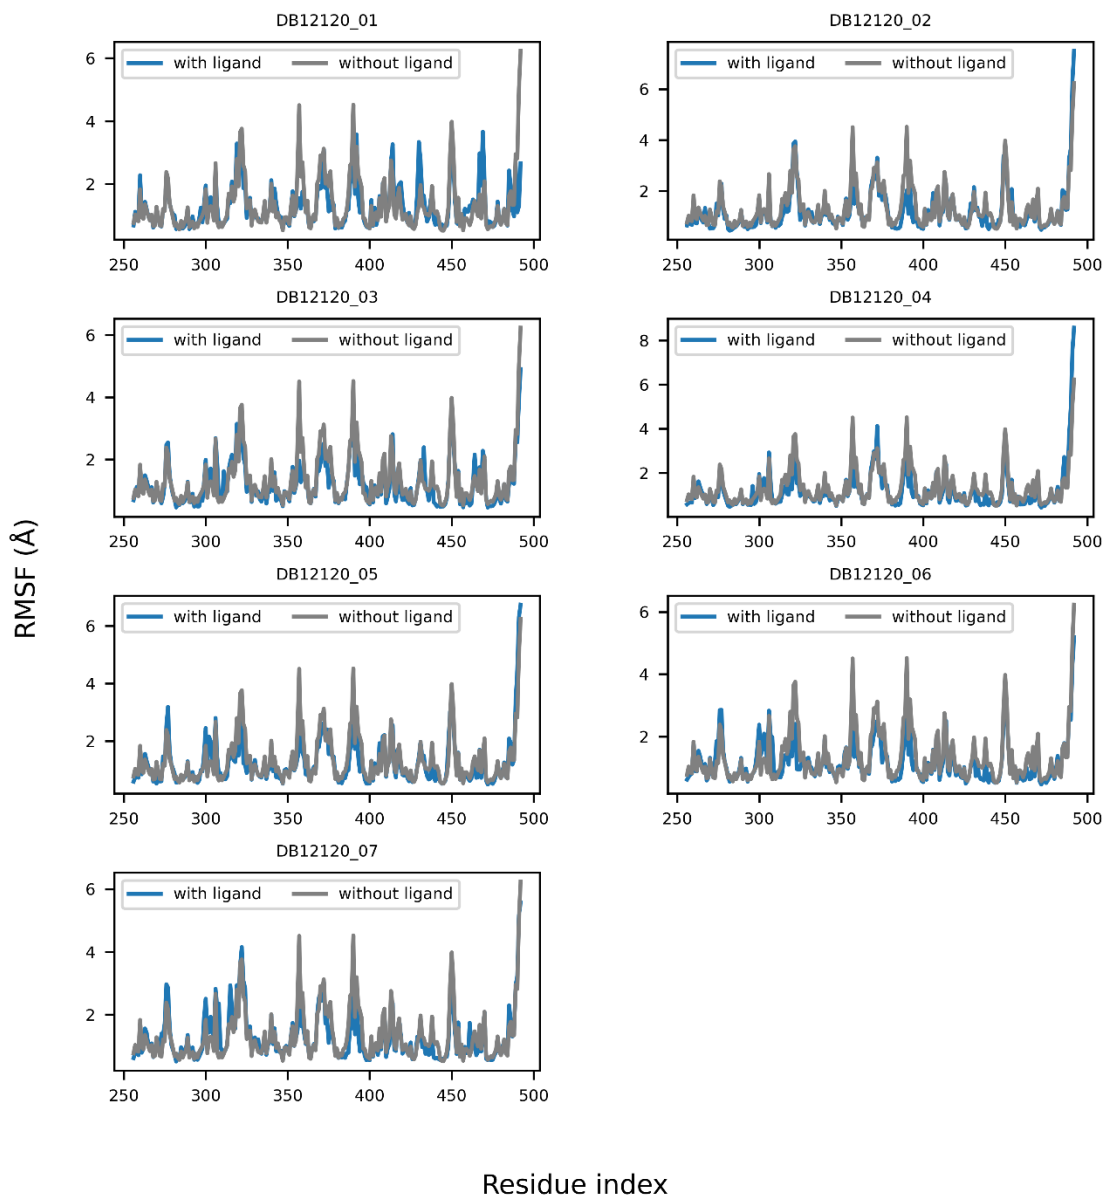

(Figure S5 continued)



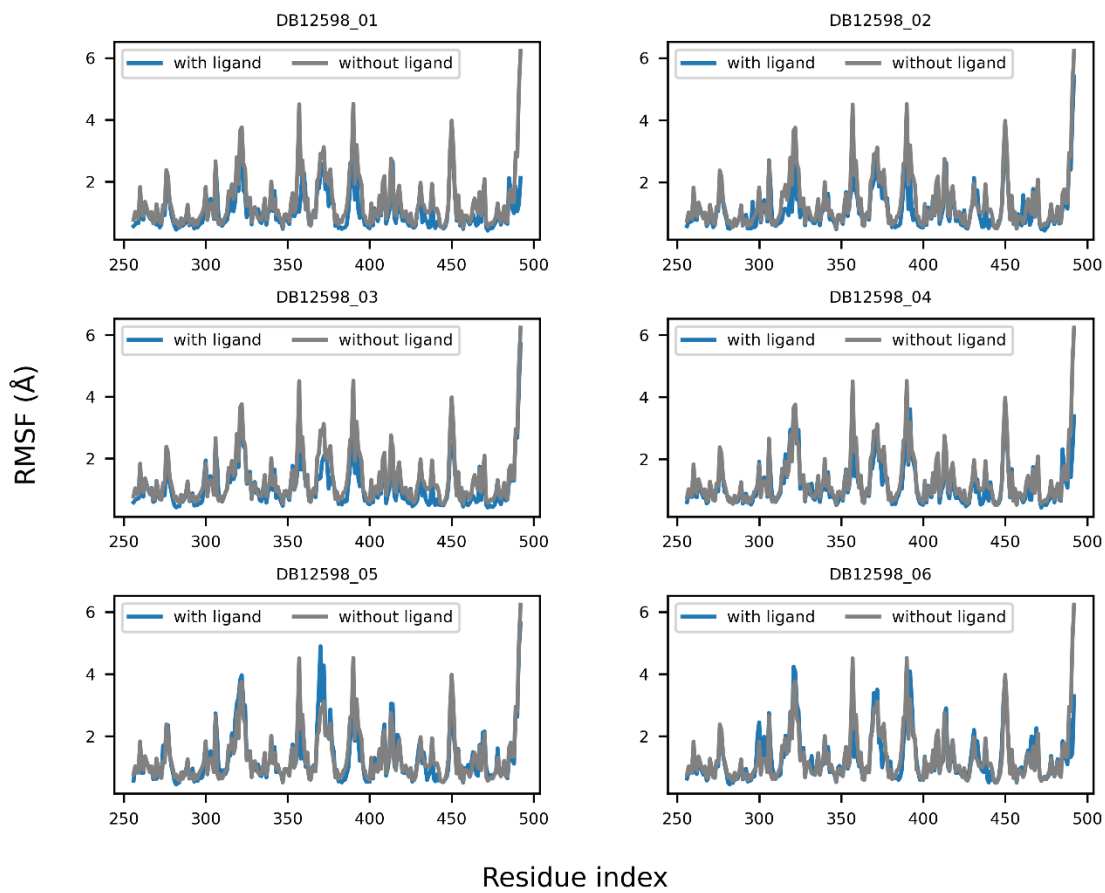

(Figure S5 continued)

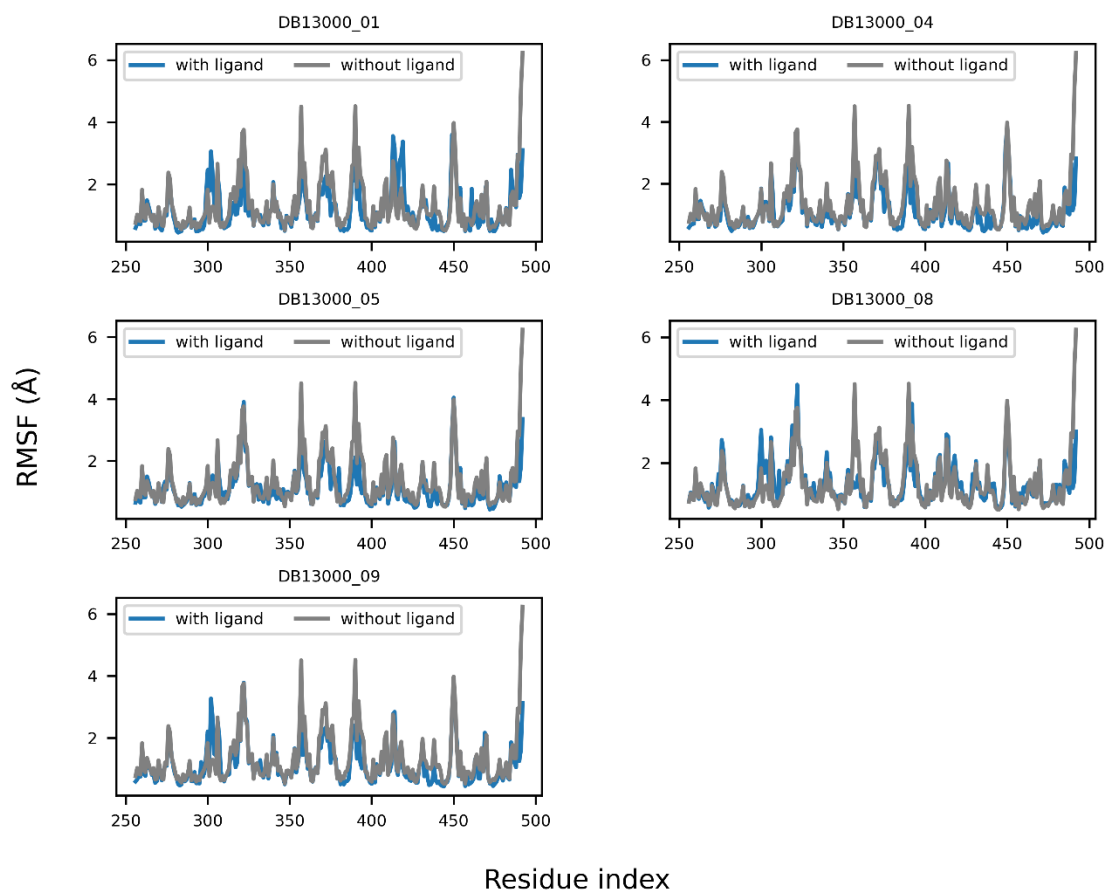

(Figure S5 continued)

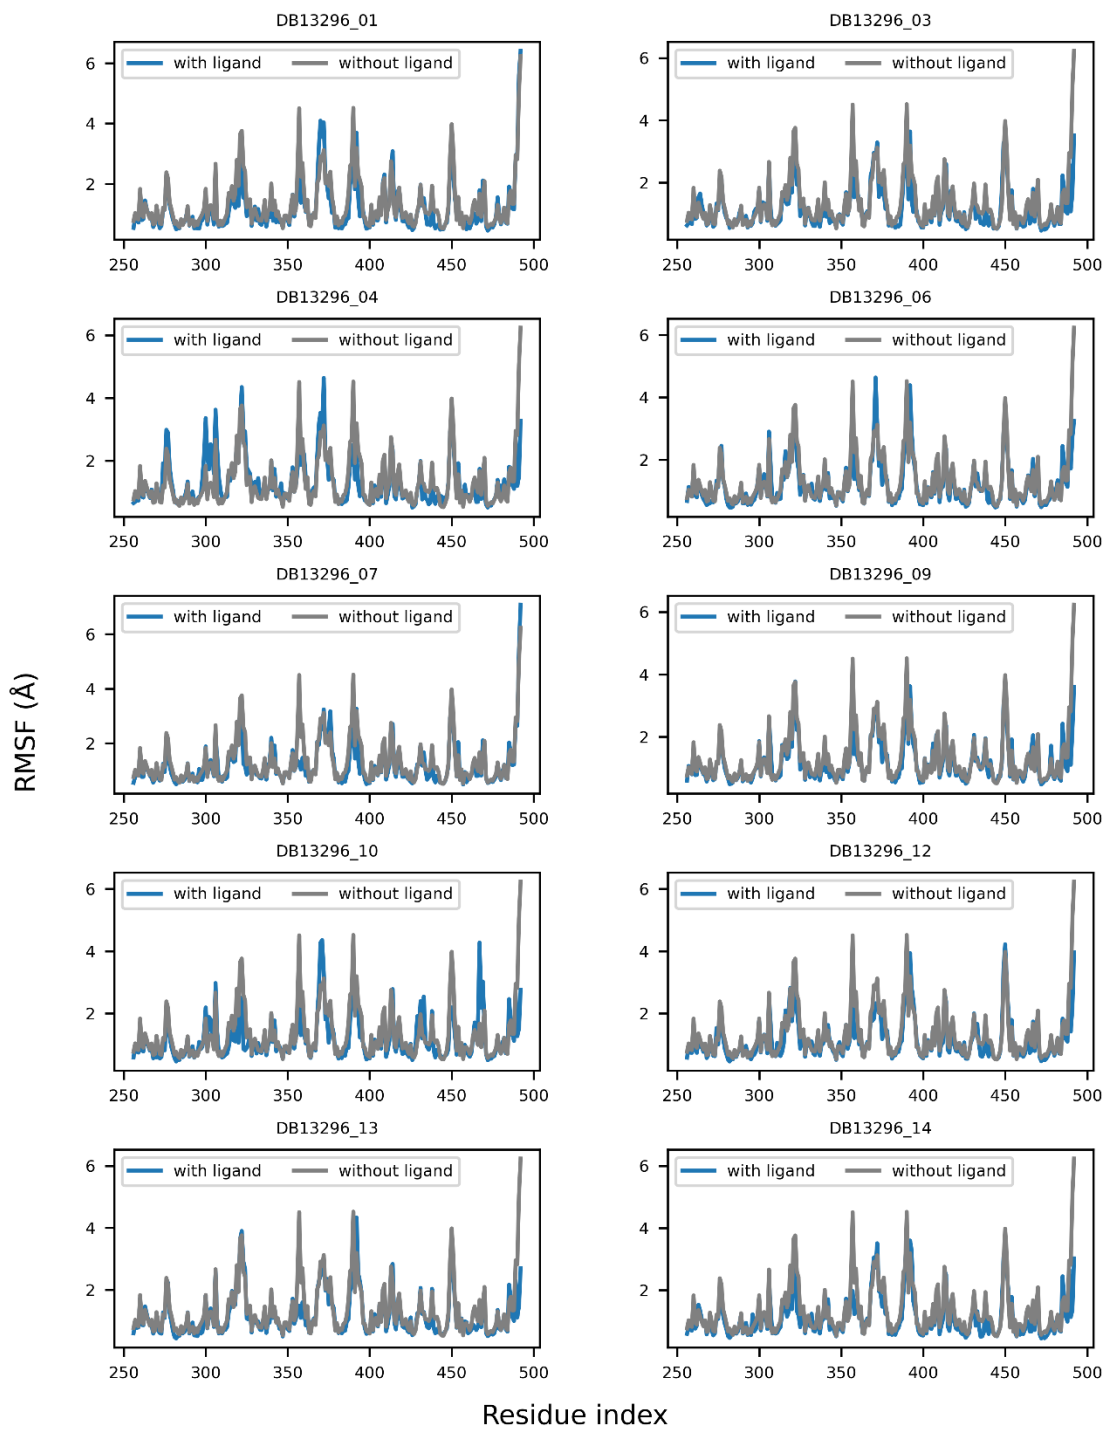

(Figure S5 continued)

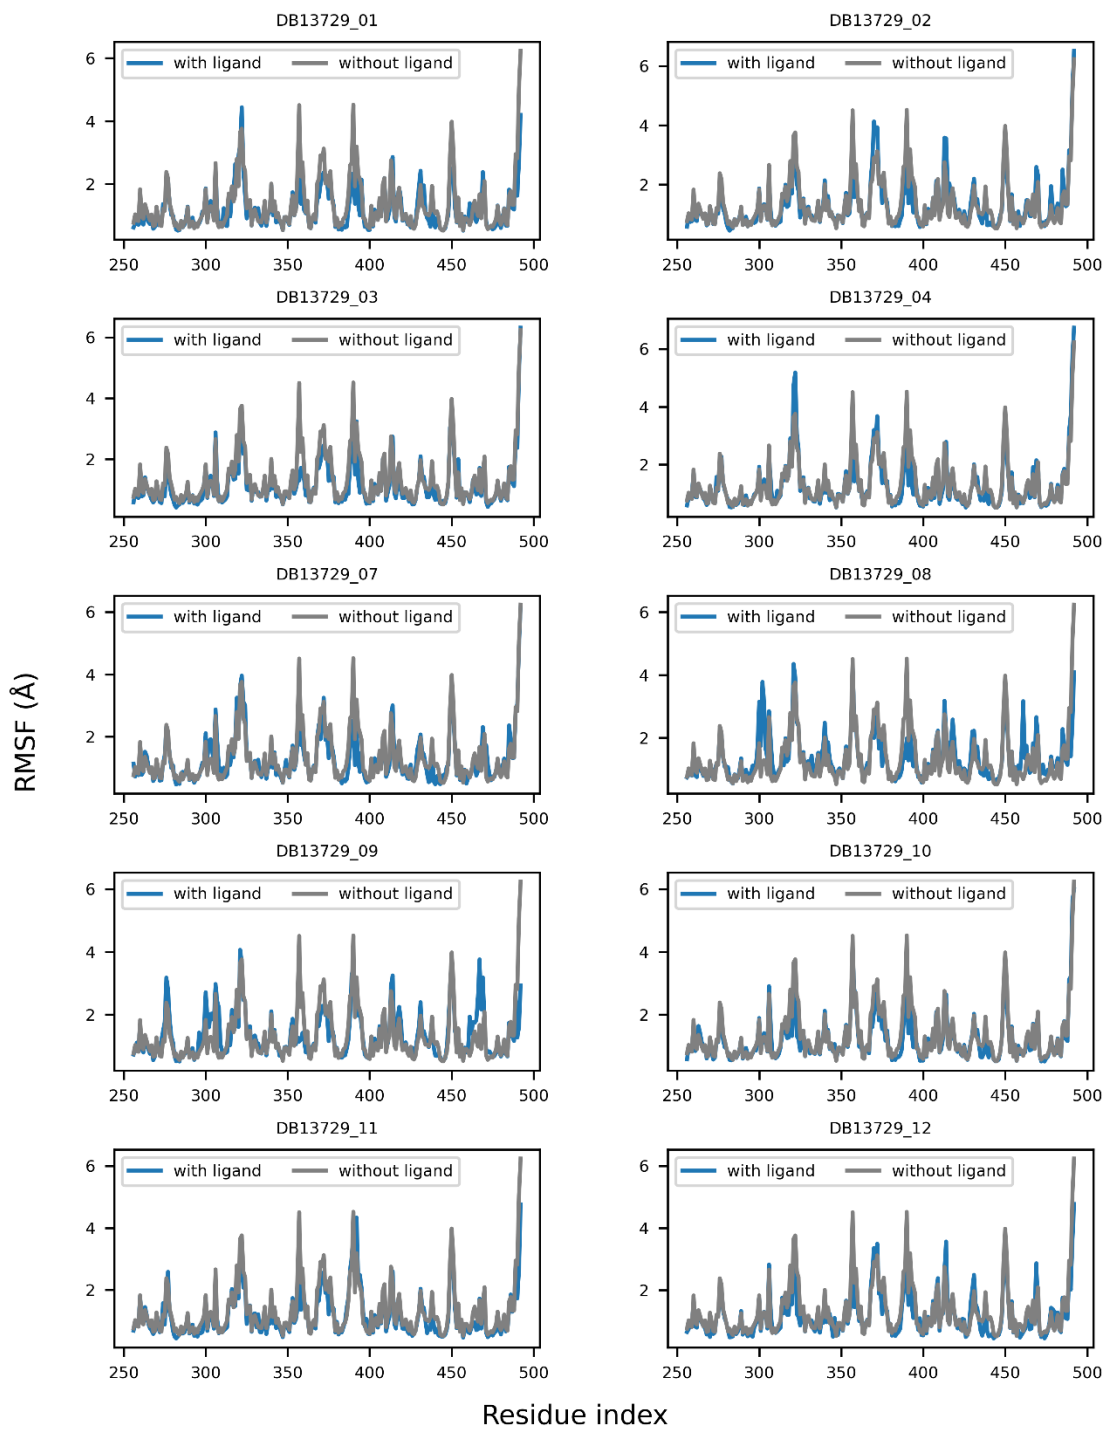

(Figure S5 continued)

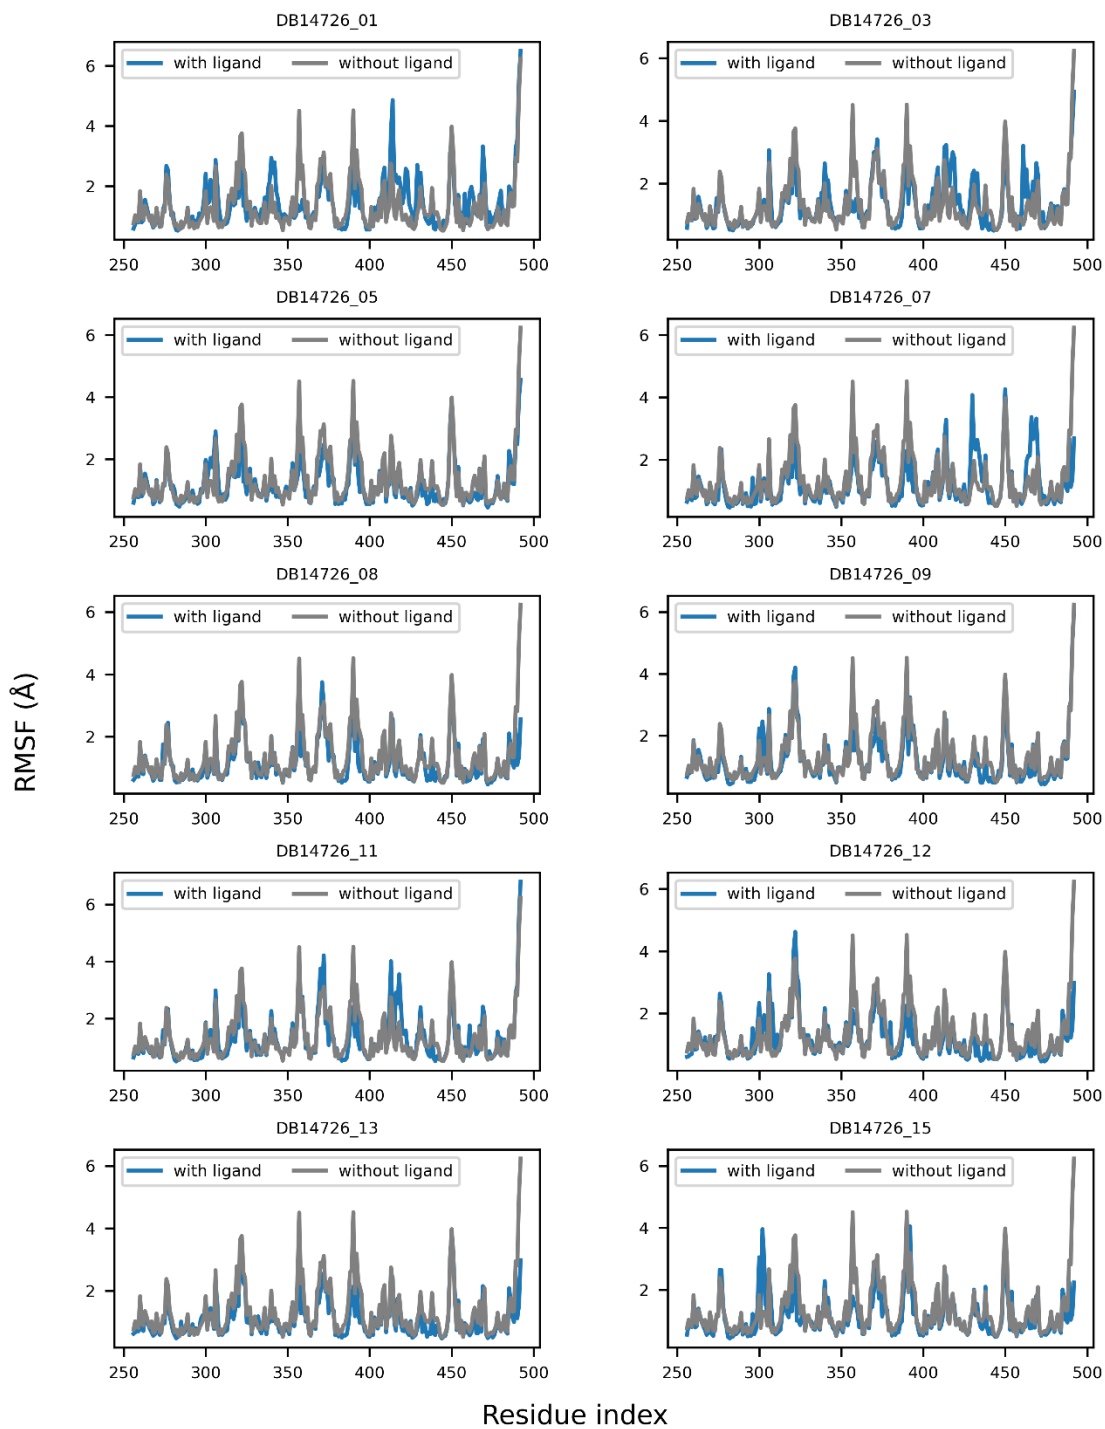

(Figure S5 continued)

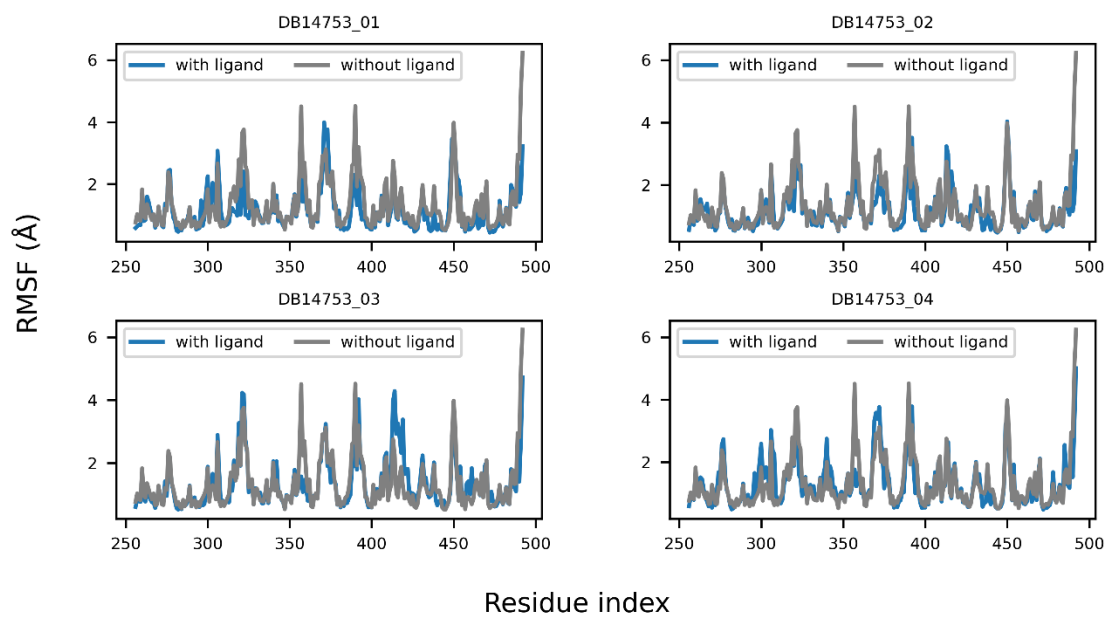

(Figure S5 continued)

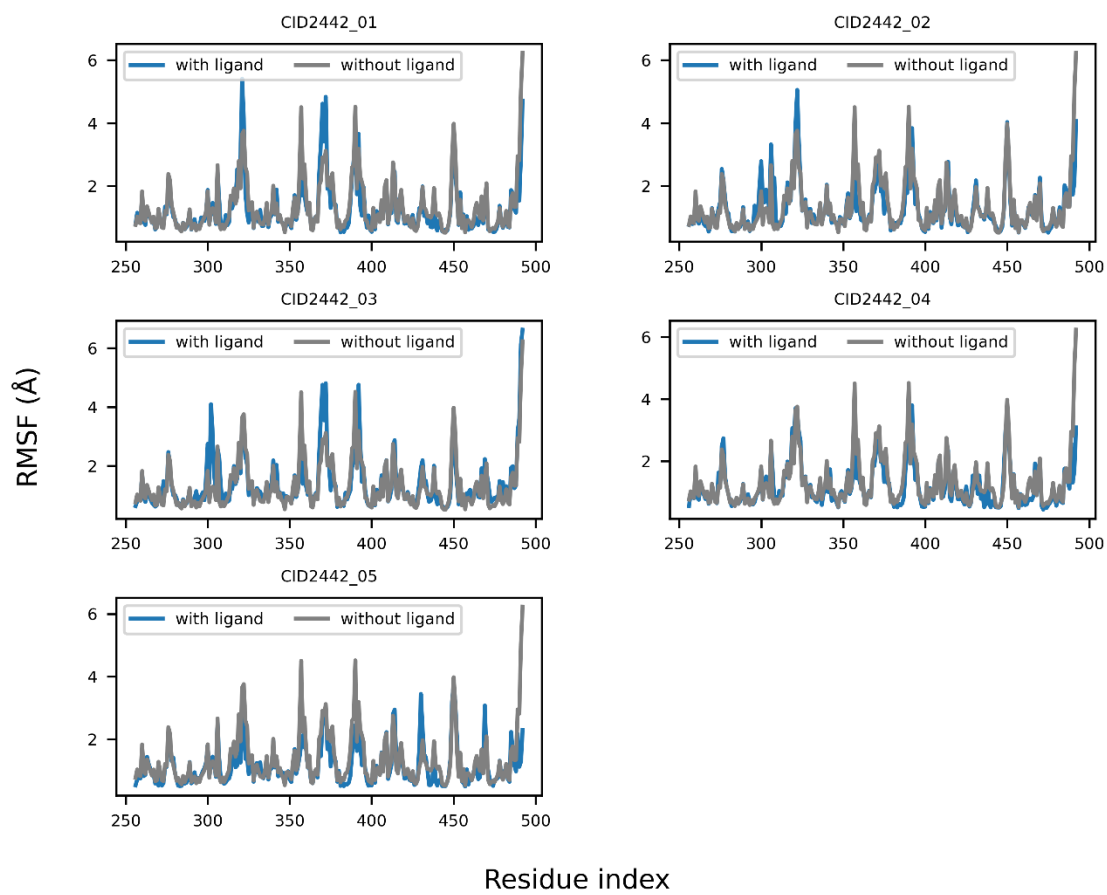

(Figure S5 continued)

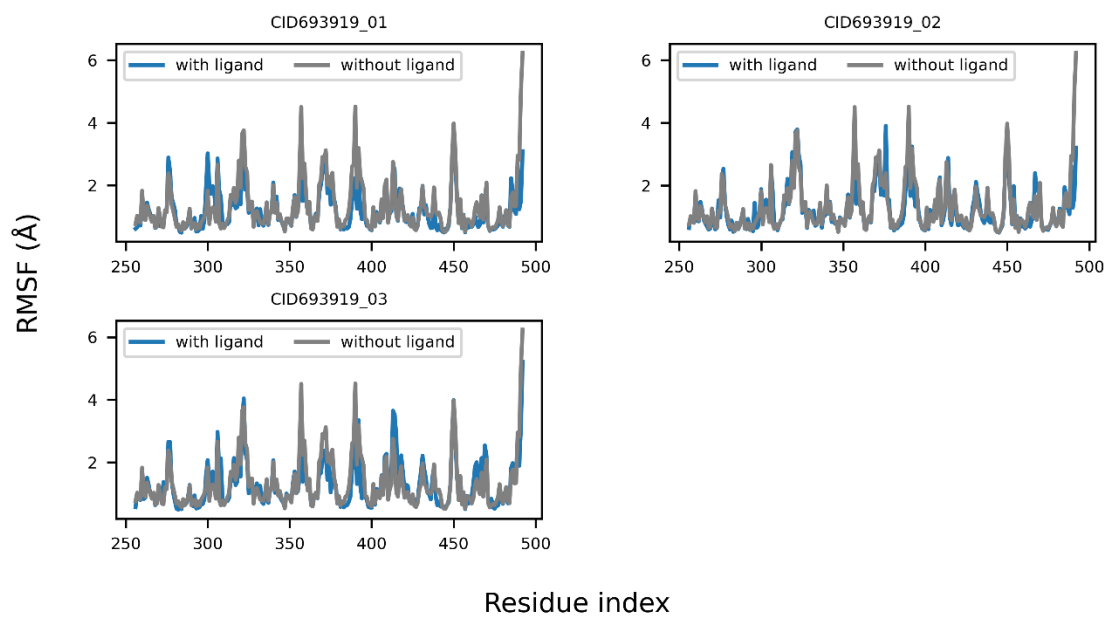

(Figure S5 continued)



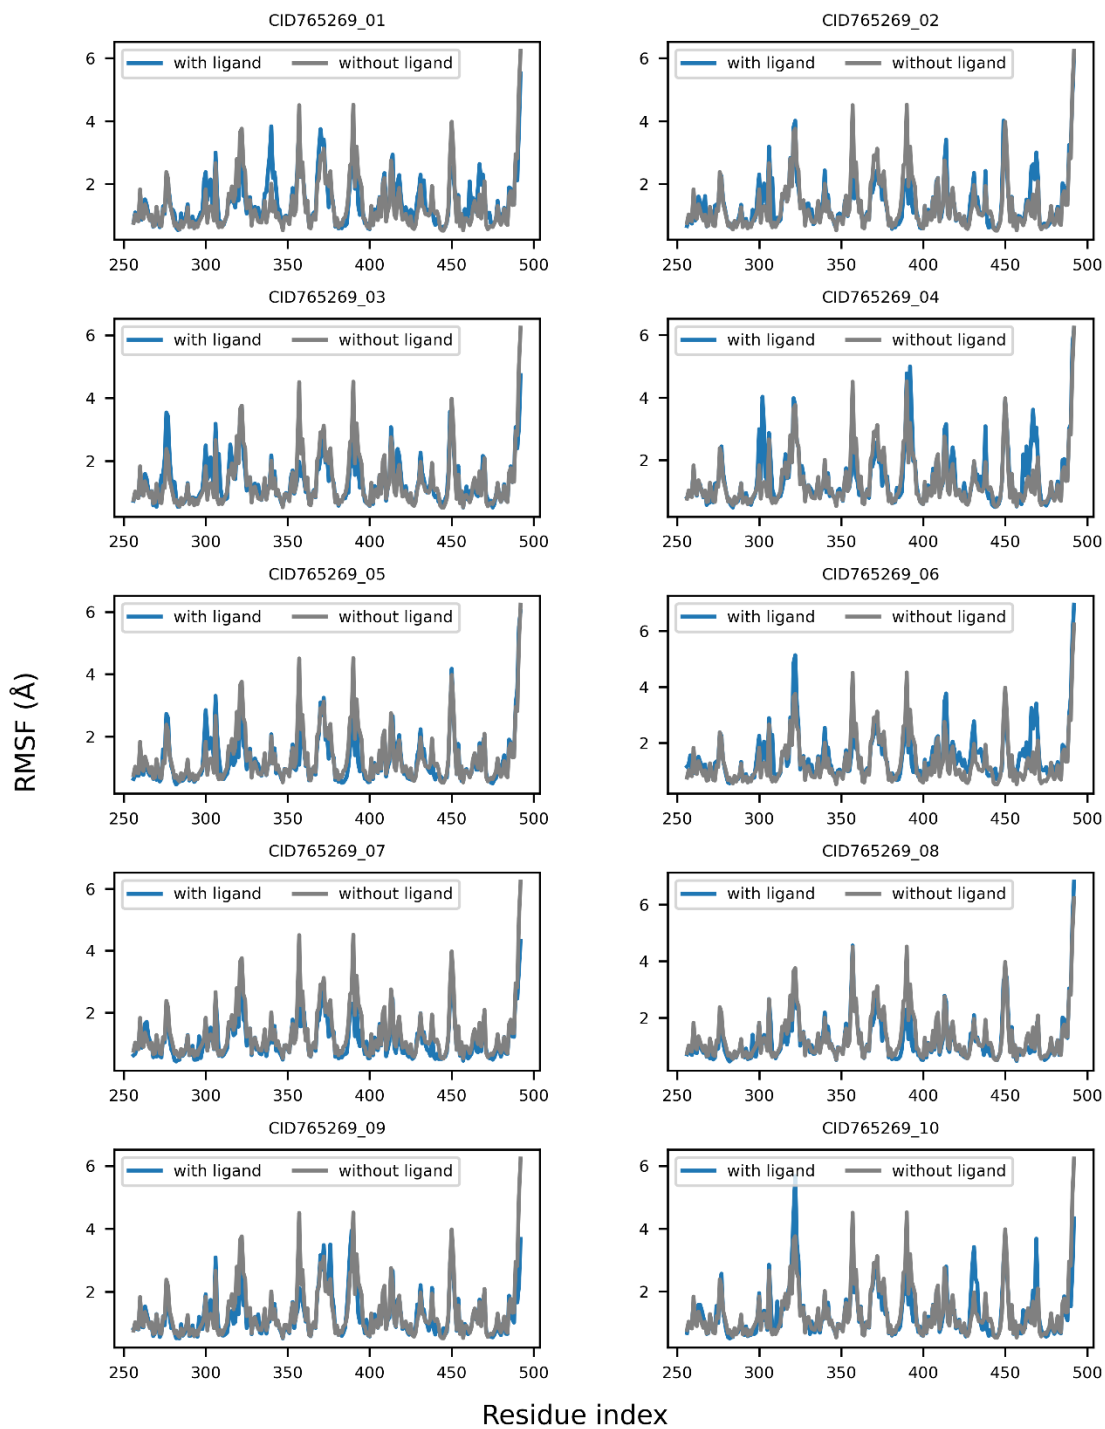

(Figure S5 continued)

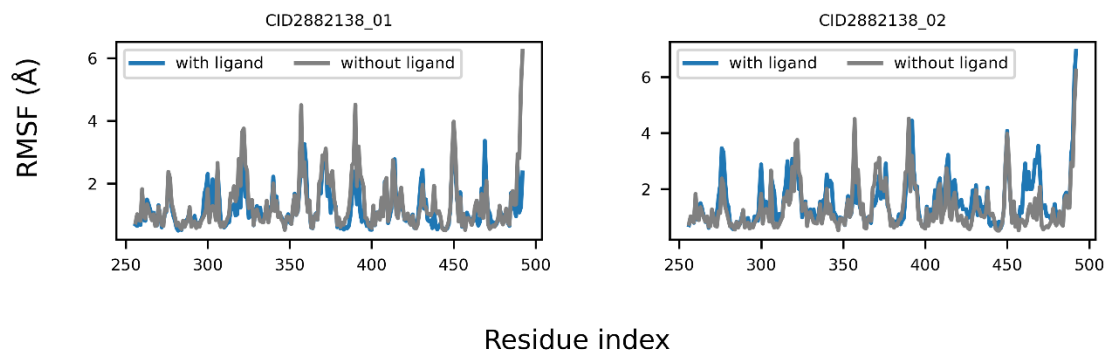

(Figure S5 continued)

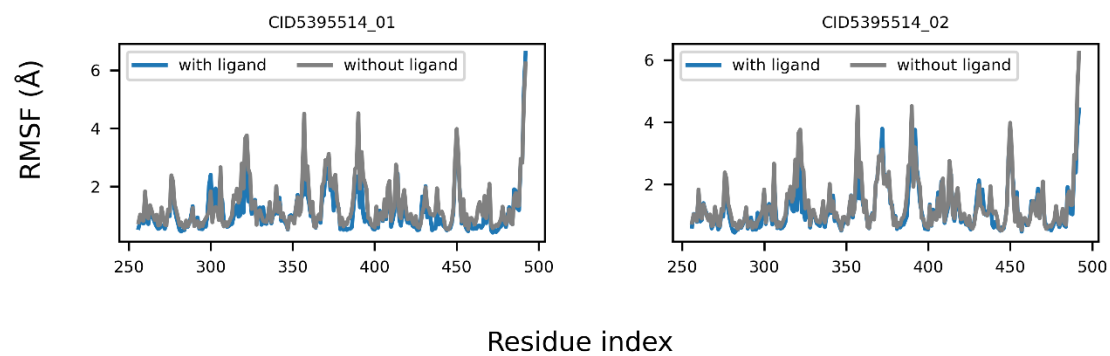

(Figure S5 continued)

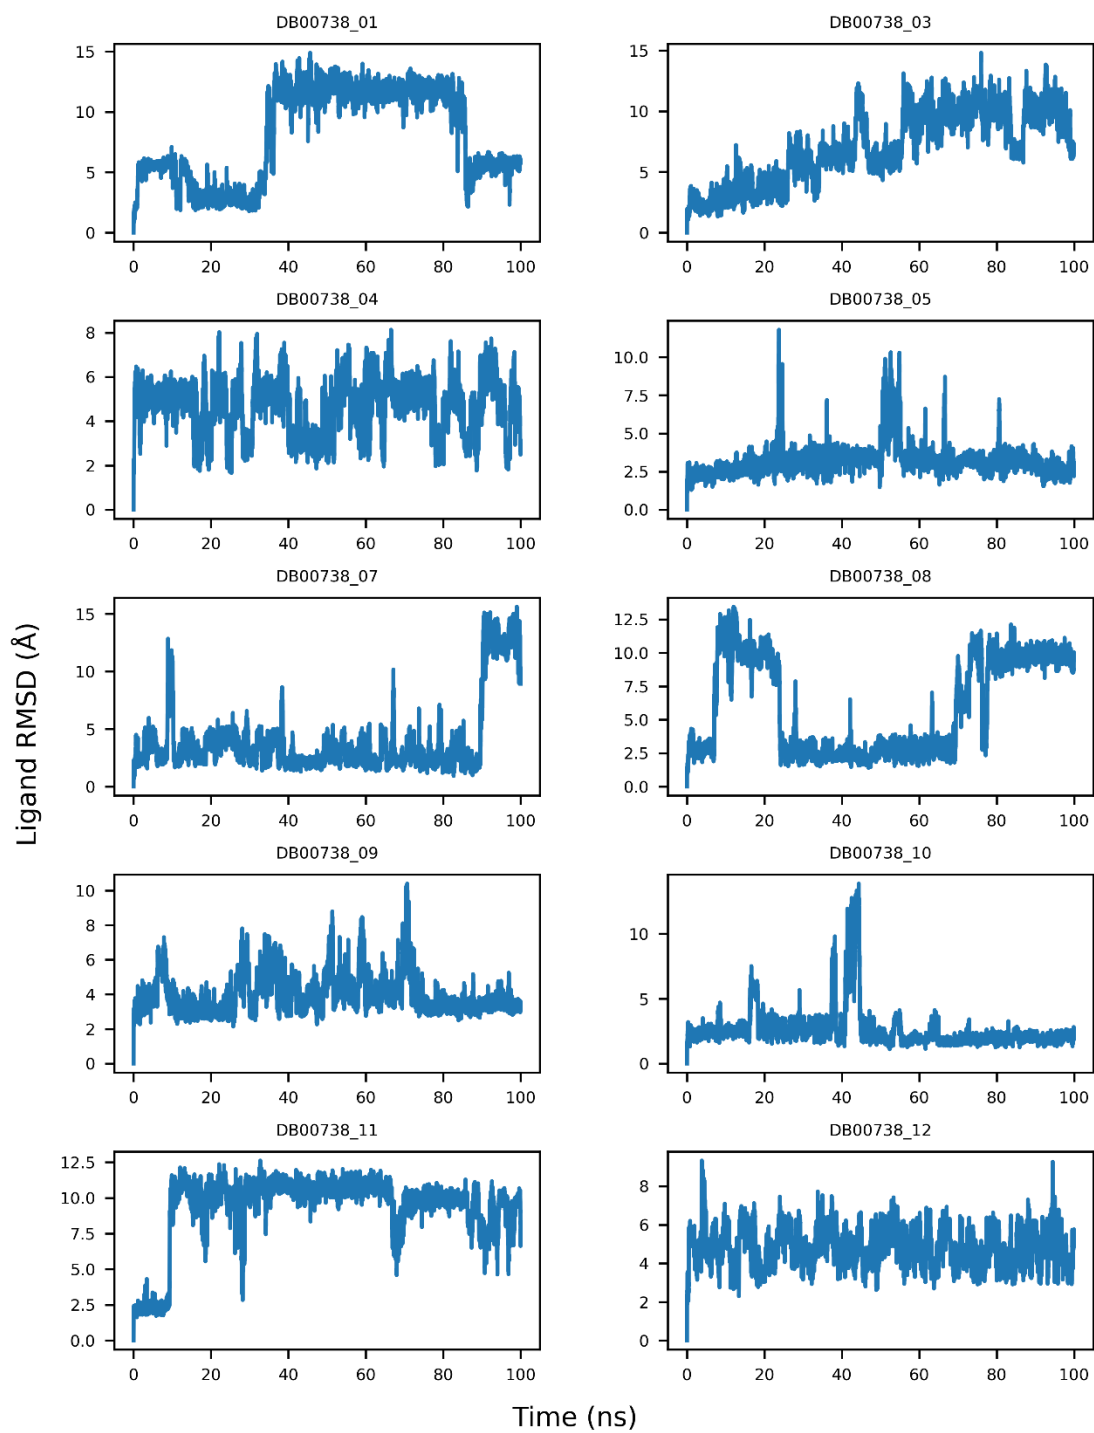

**Figure S6.** Ligand RMSD calculated from 100 ns molecular dynamics simulations for each compound with different poses.

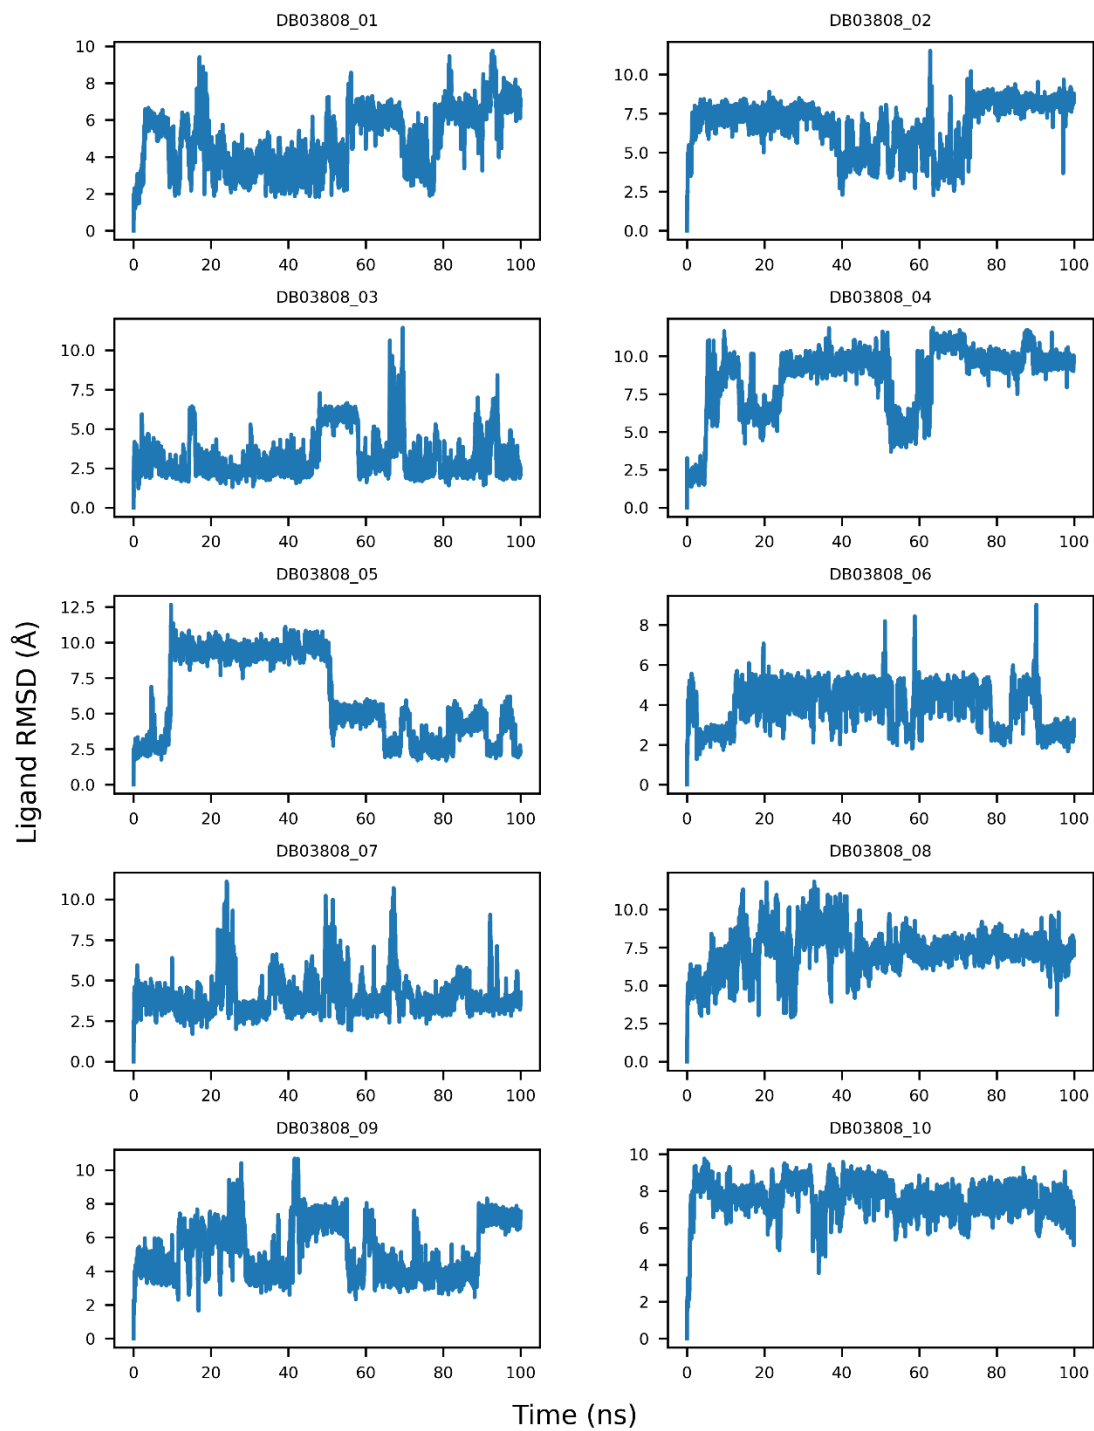

(Figure S6 continued)

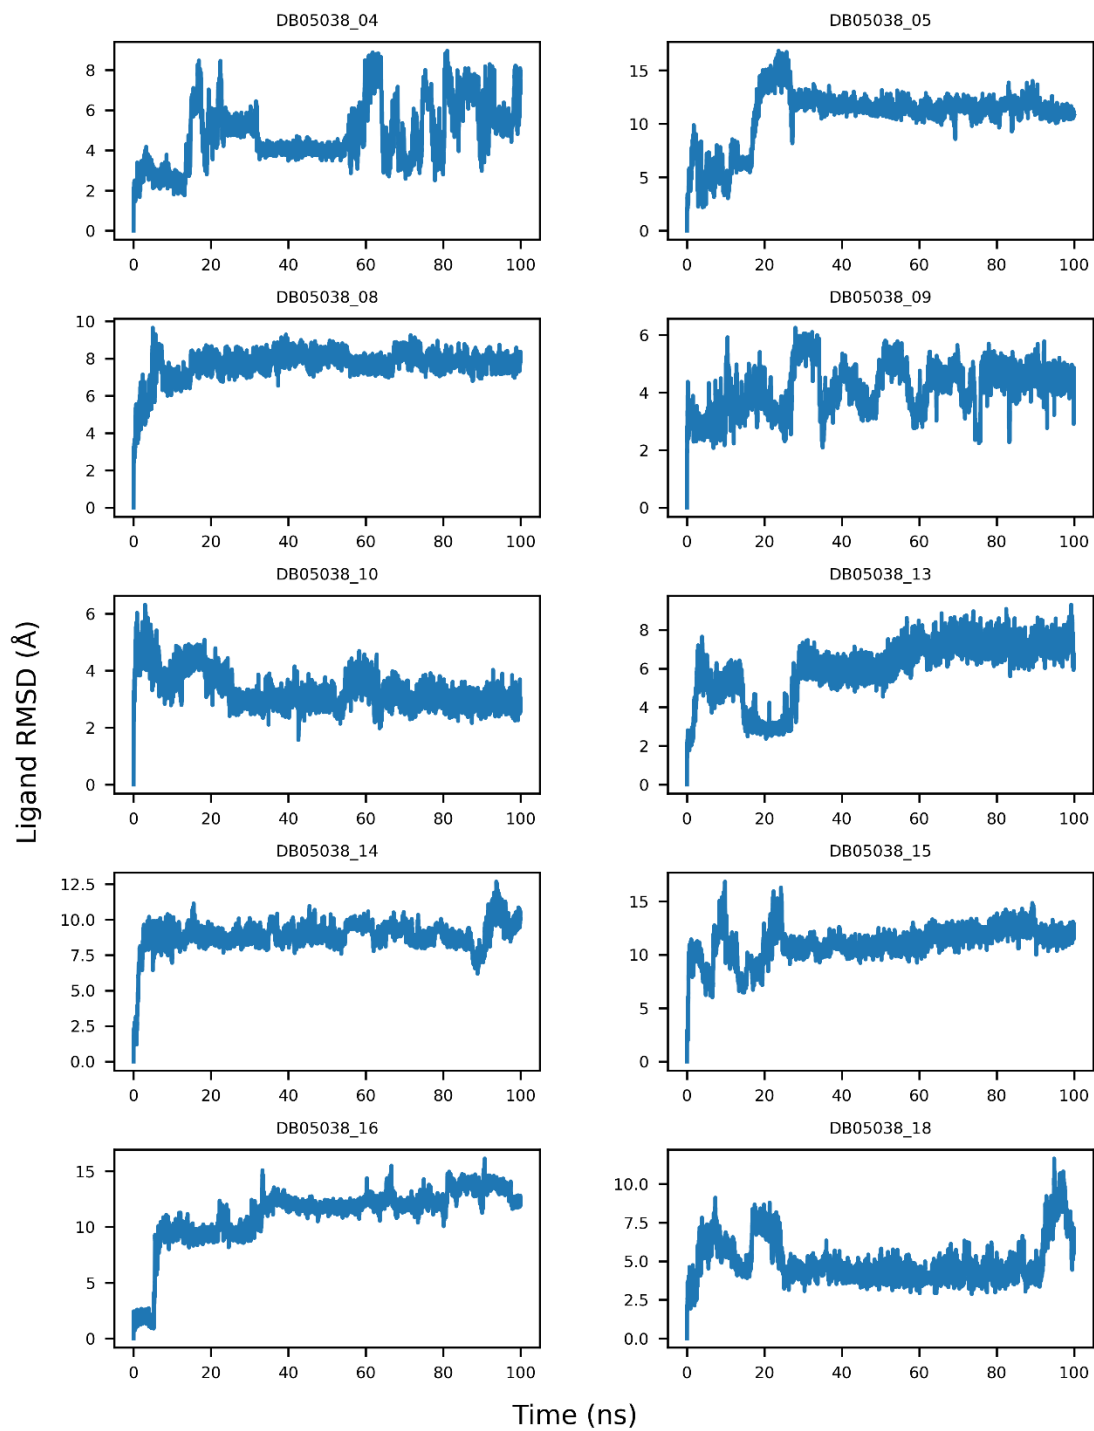

(Figure S6 continued)

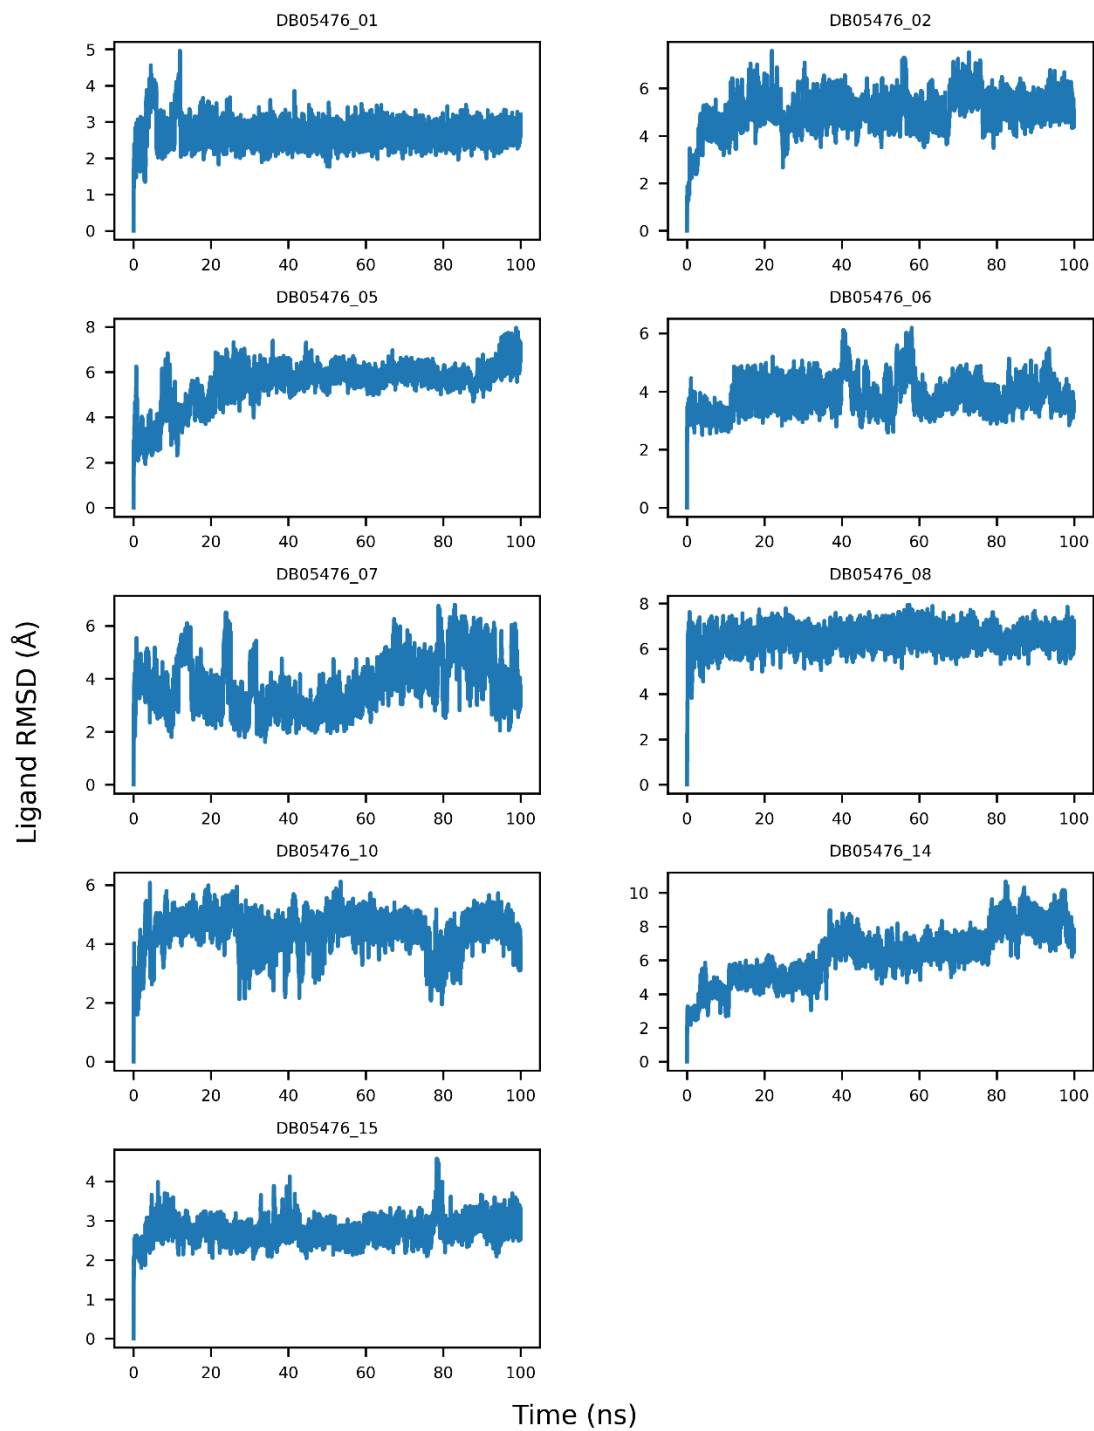

(Figure S6 continued)

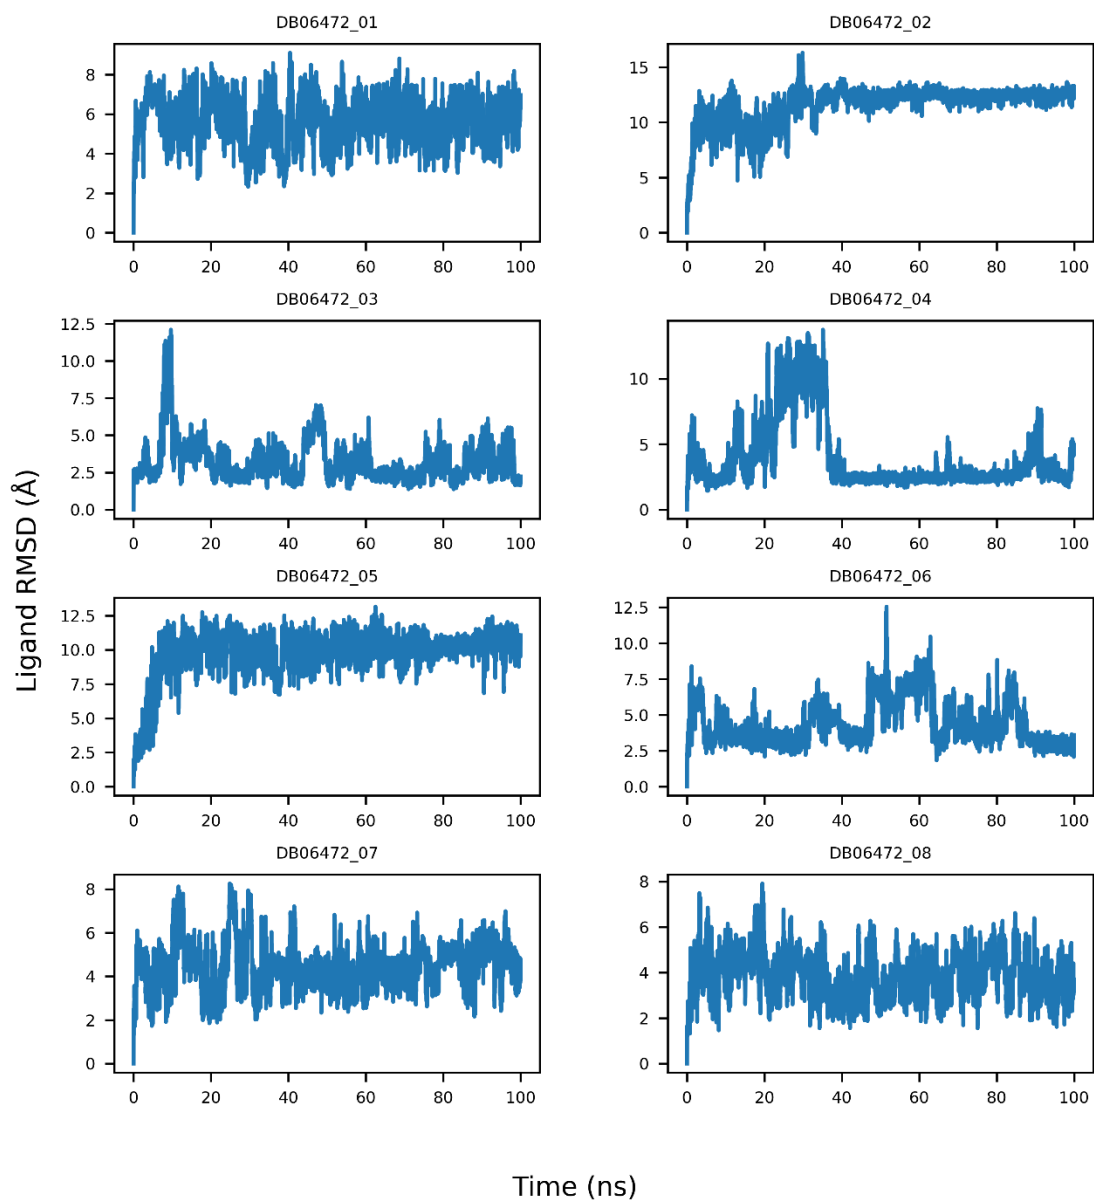

(Figure S6 continued)



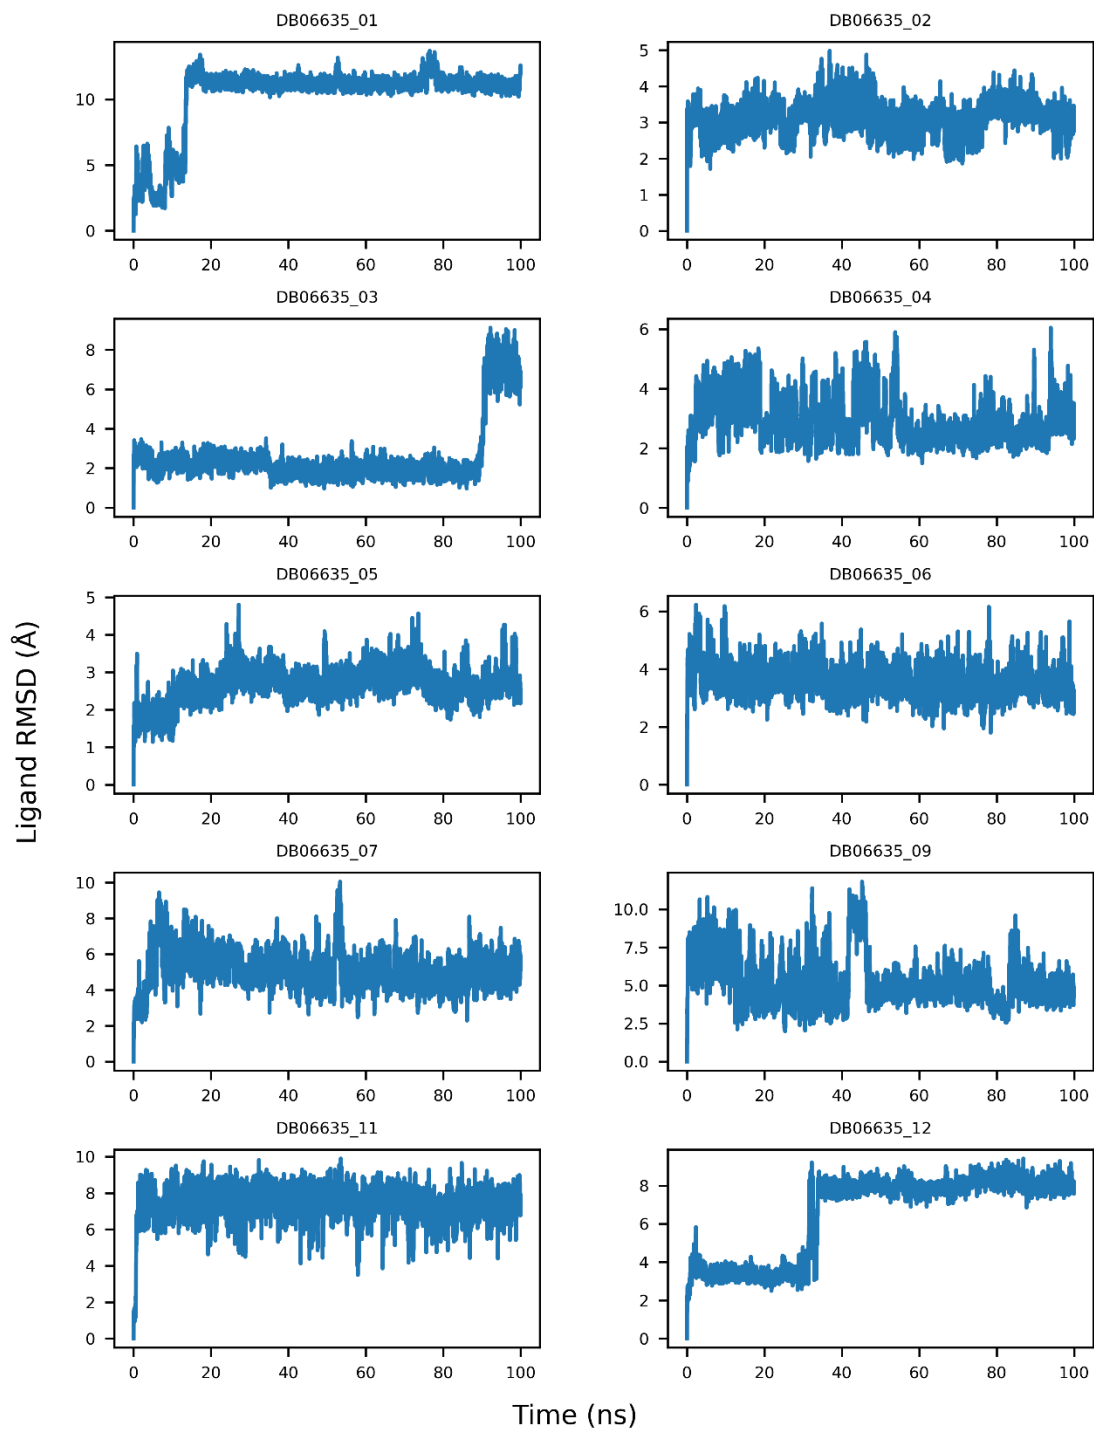

(Figure S6 continued)

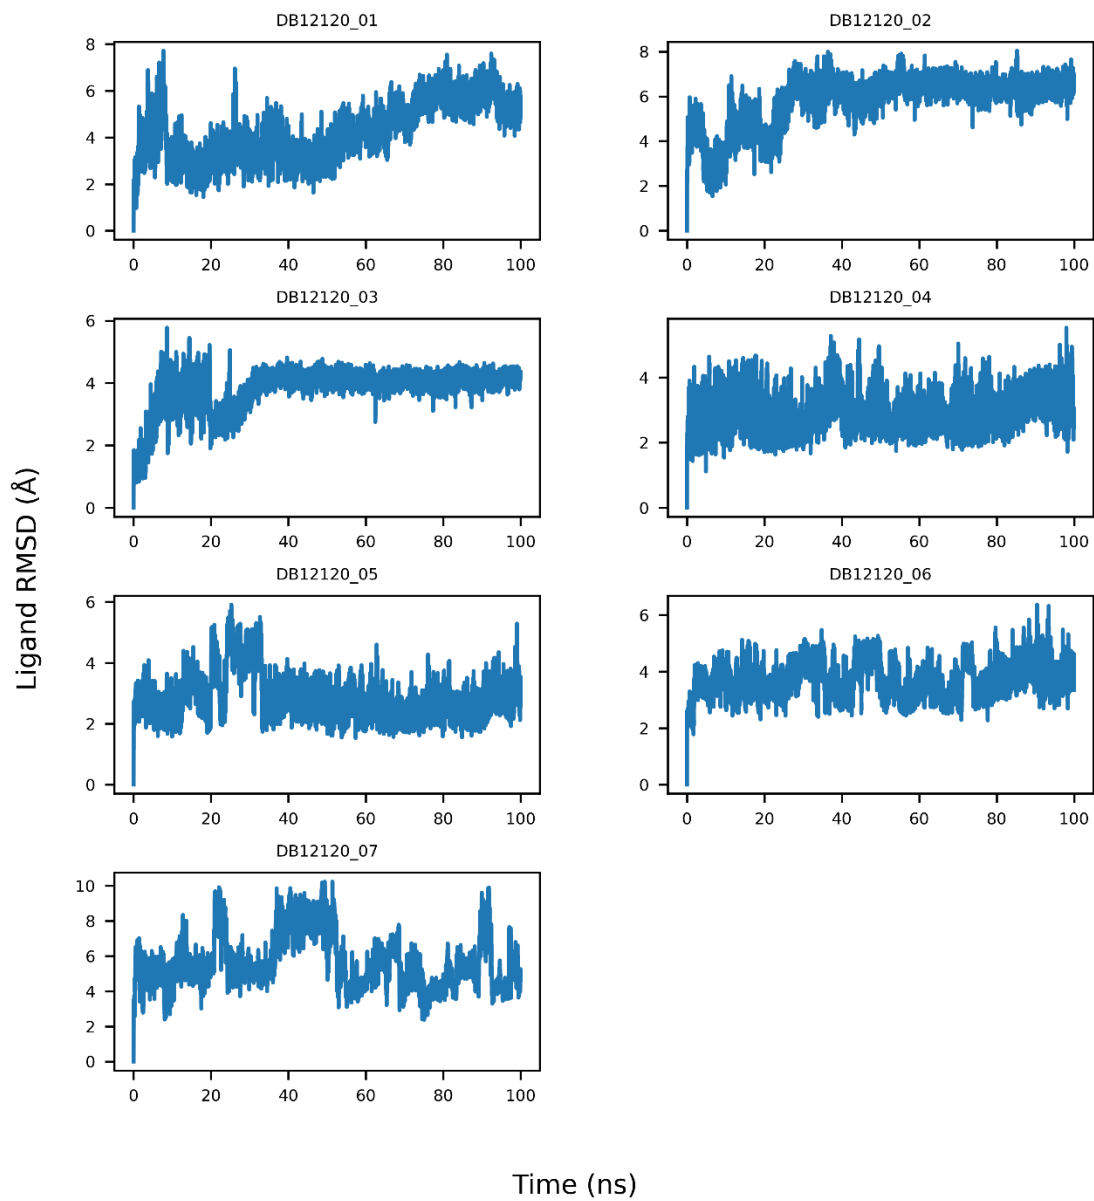

(Figure S6 continued)

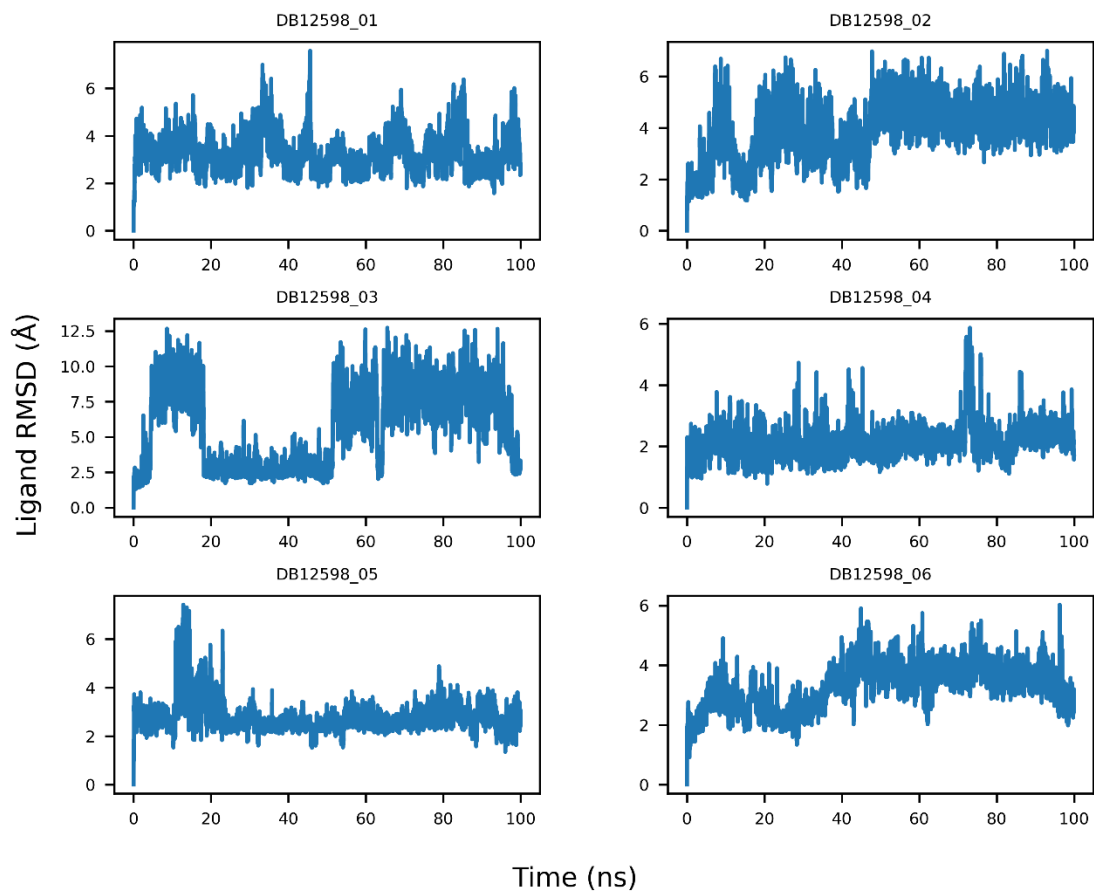

(Figure S6 continued)

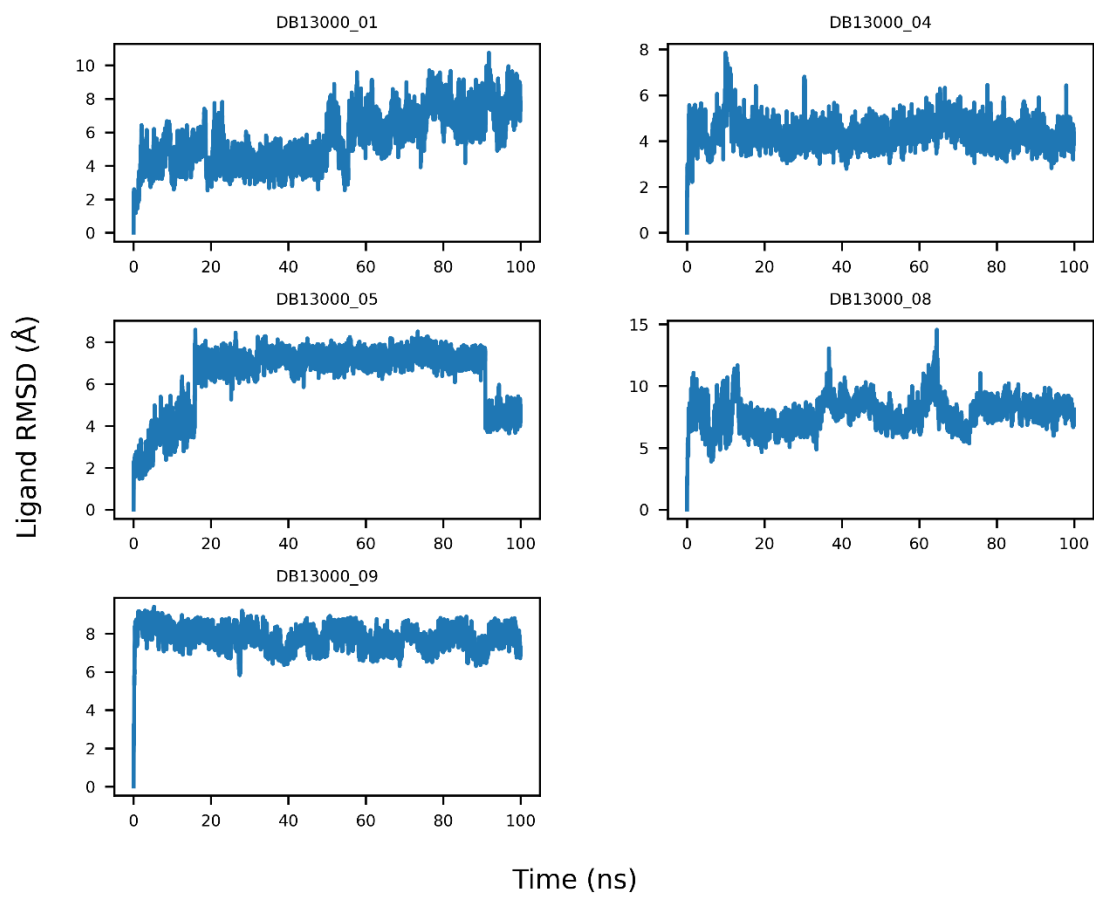

(Figure S6 continued)

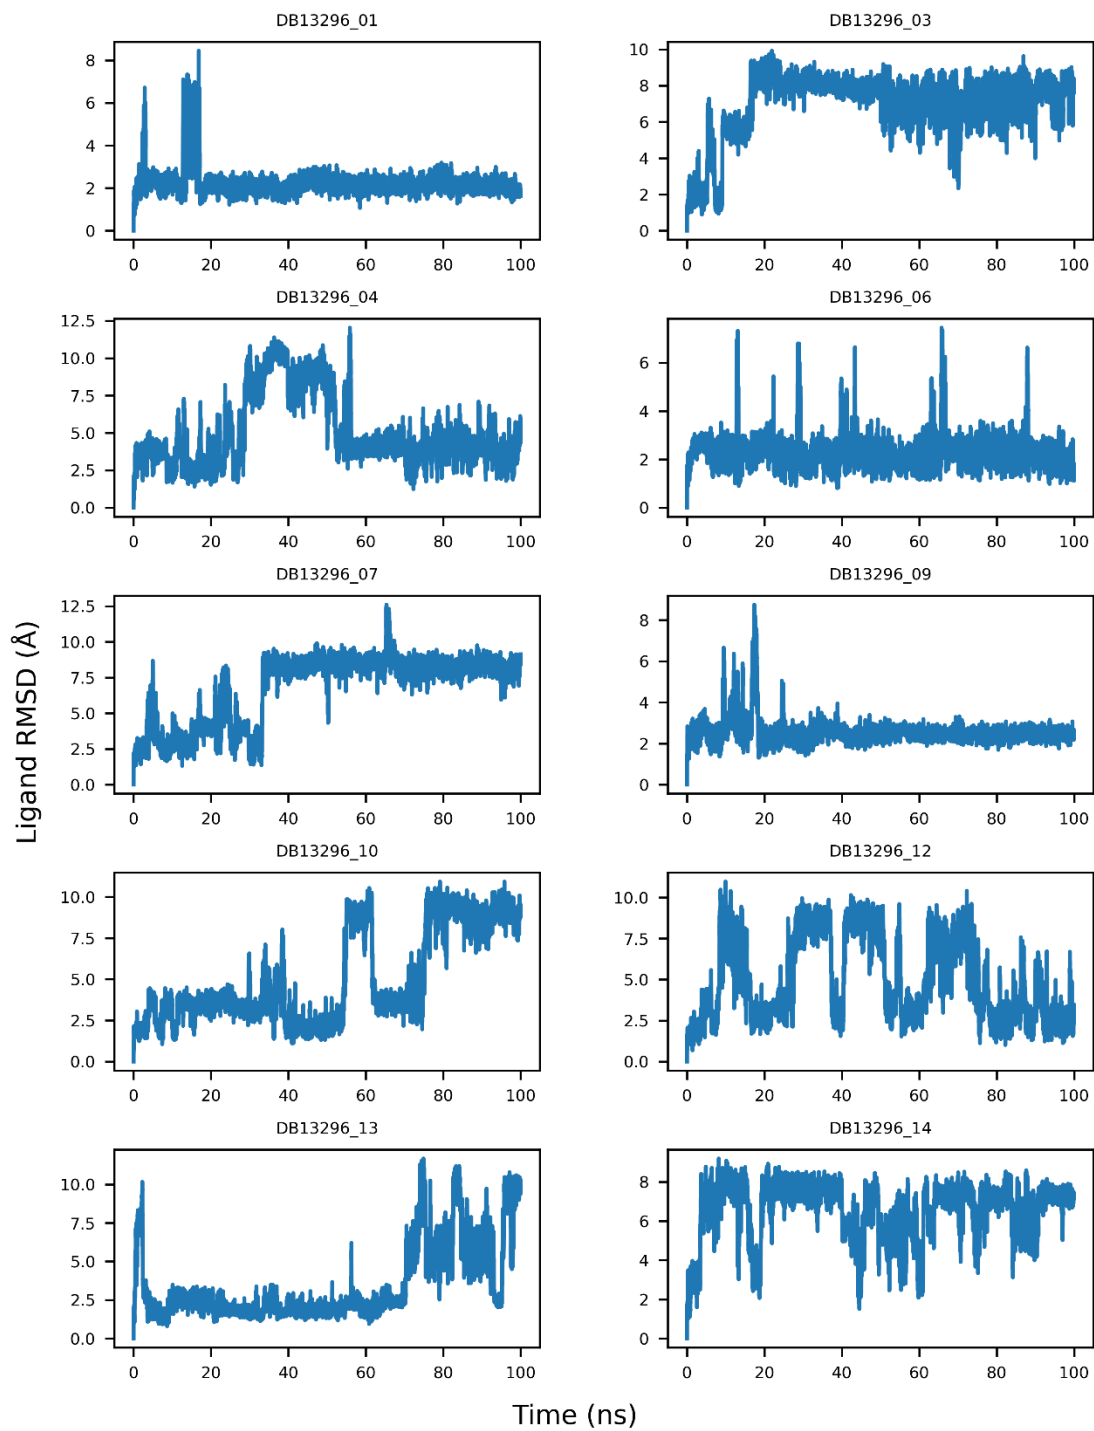

(Figure S6 continued)

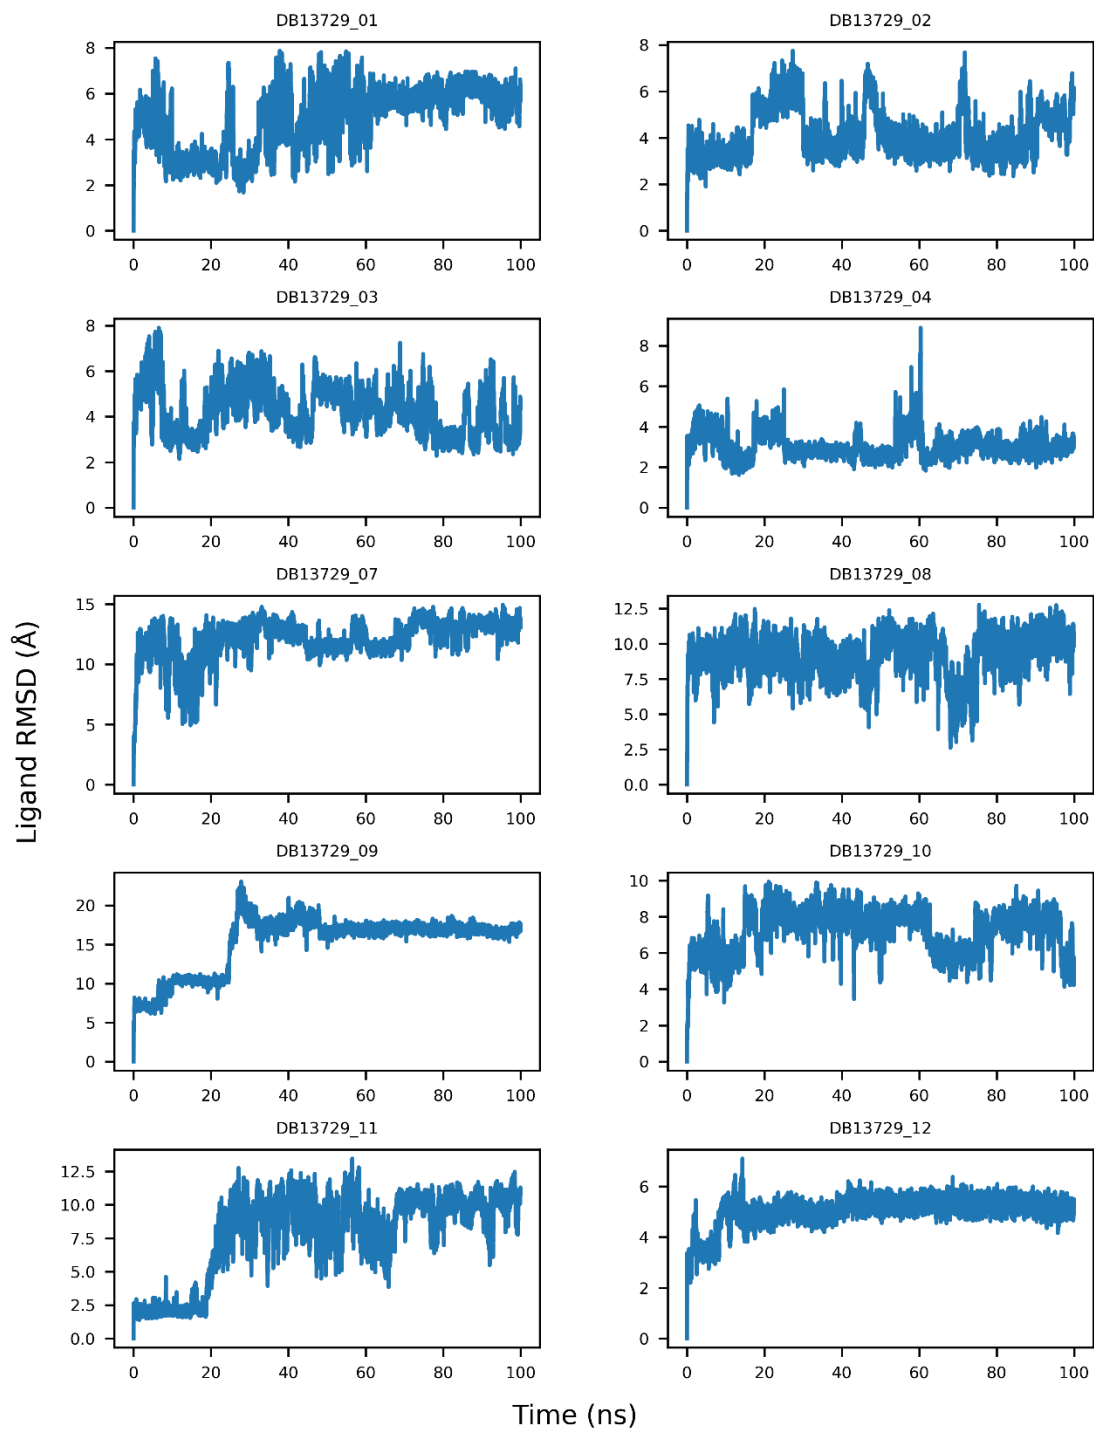

(Figure S6 continued)

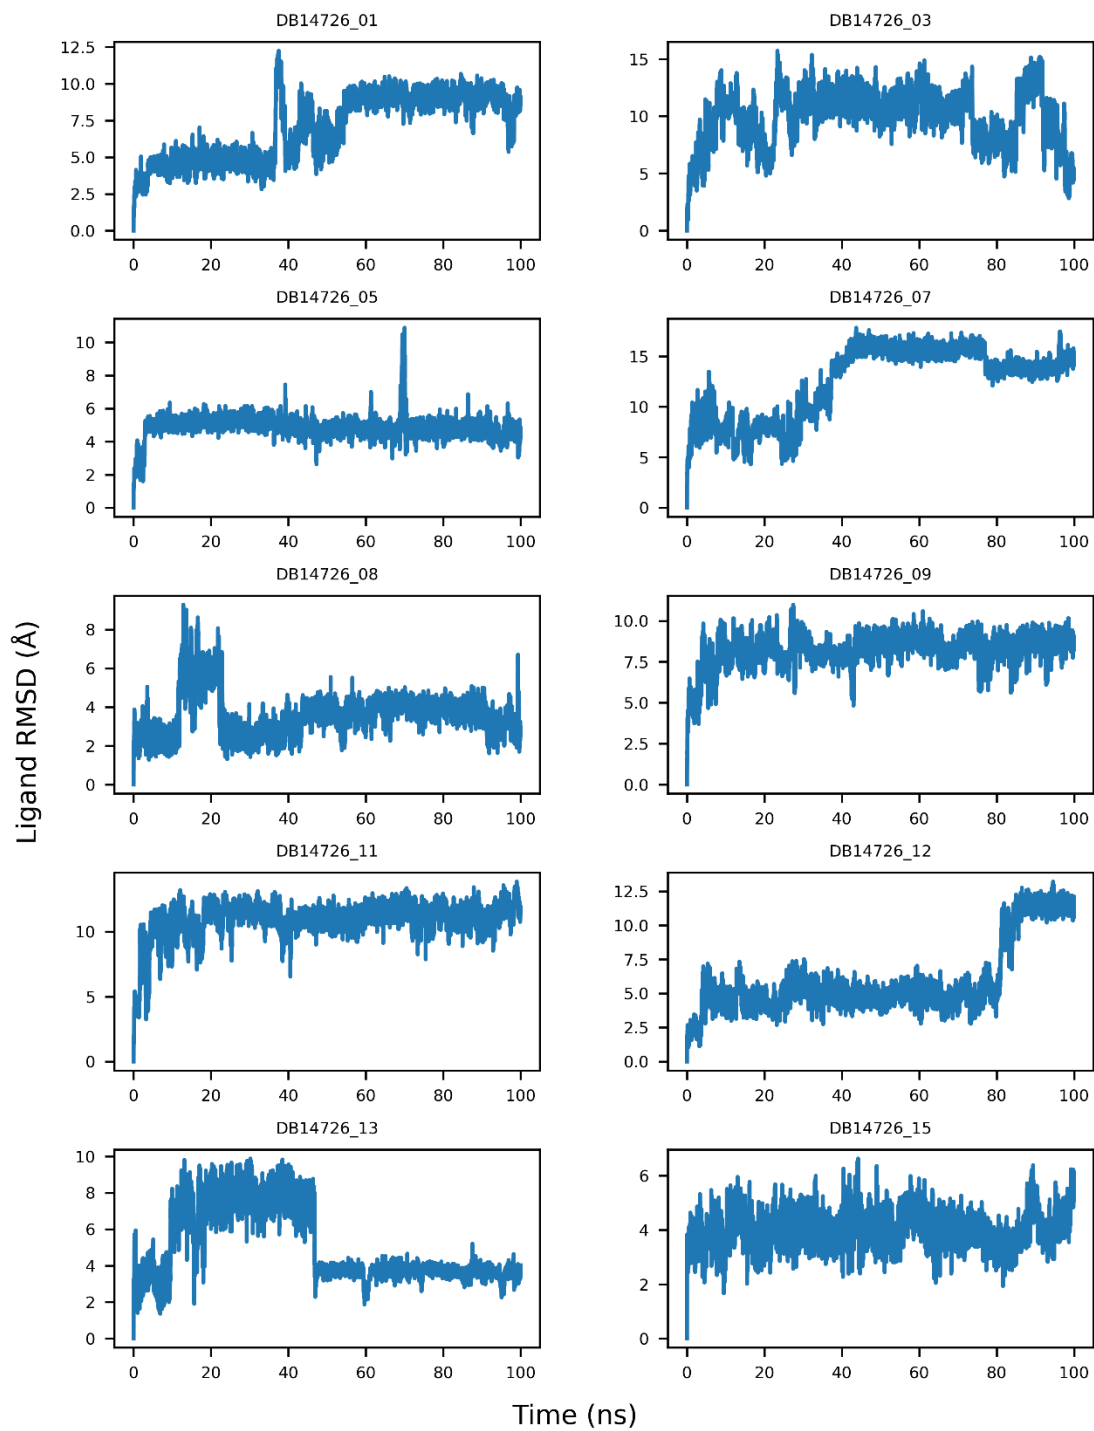

(Figure S6 continued)

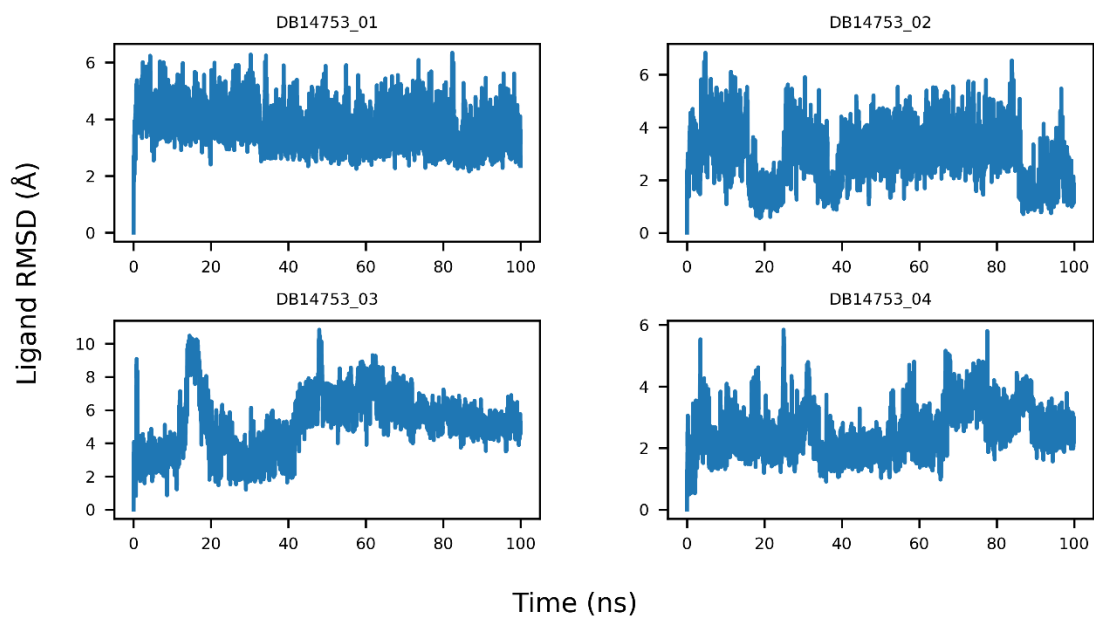

(Figure S6 continued)



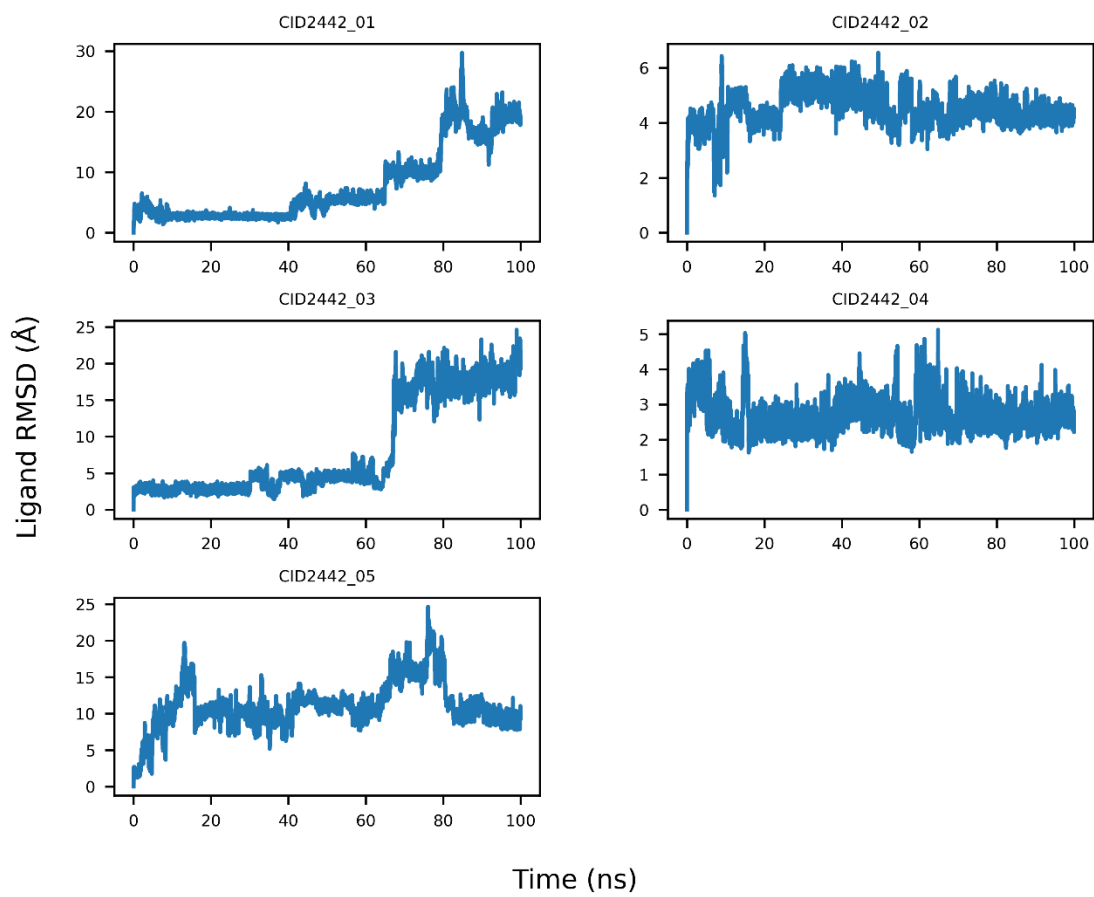

(Figure S6 continued)

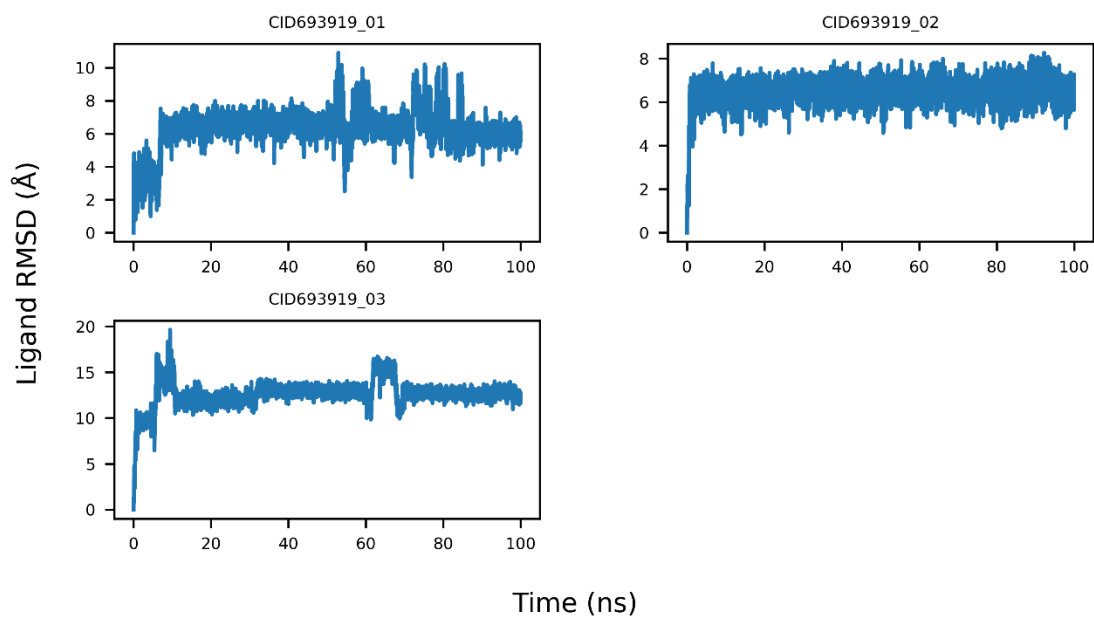

(Figure S6 continued)

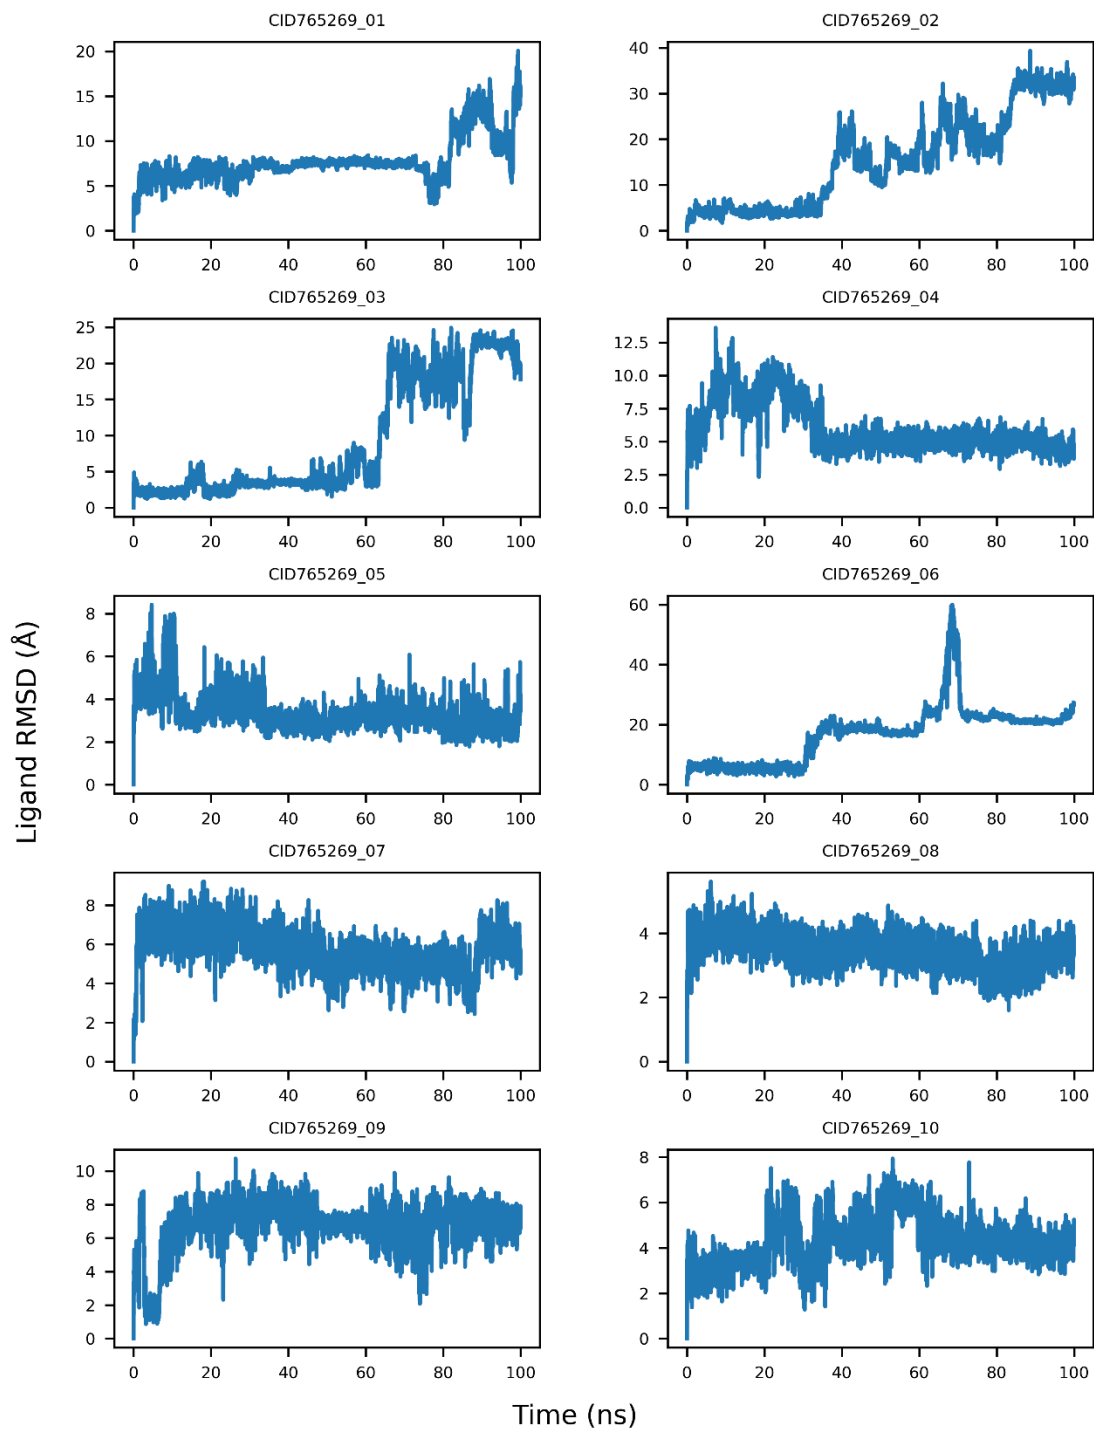

(Figure S6 continued)

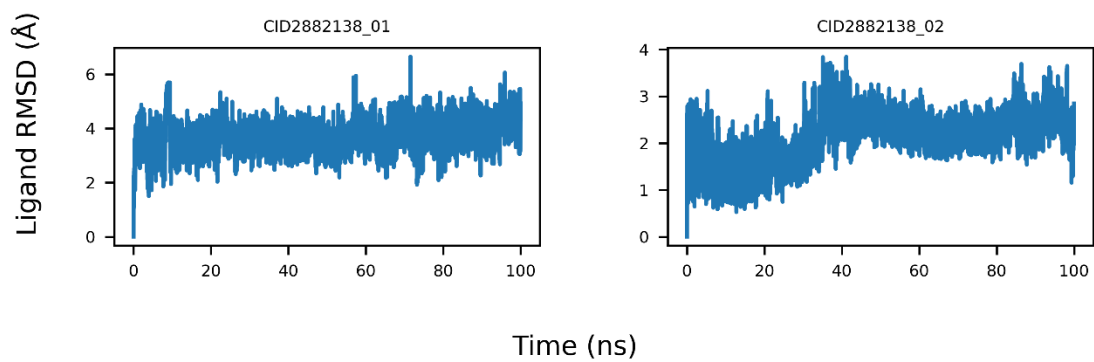

(Figure S6 continued)

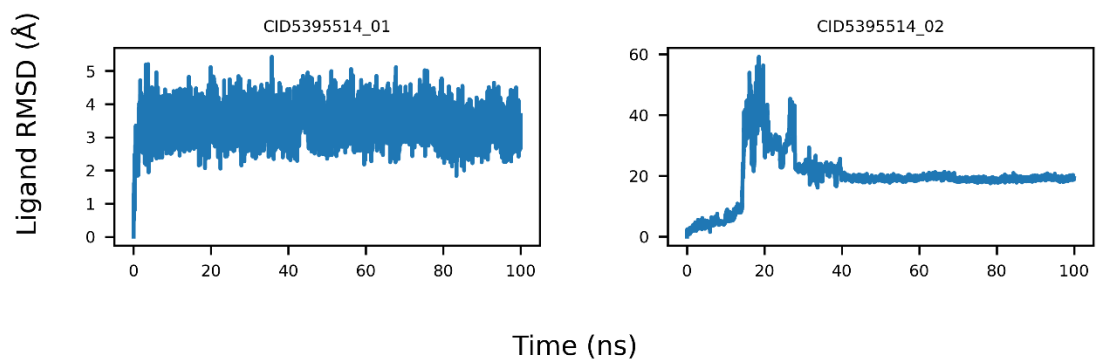

(Figure S6 continued)

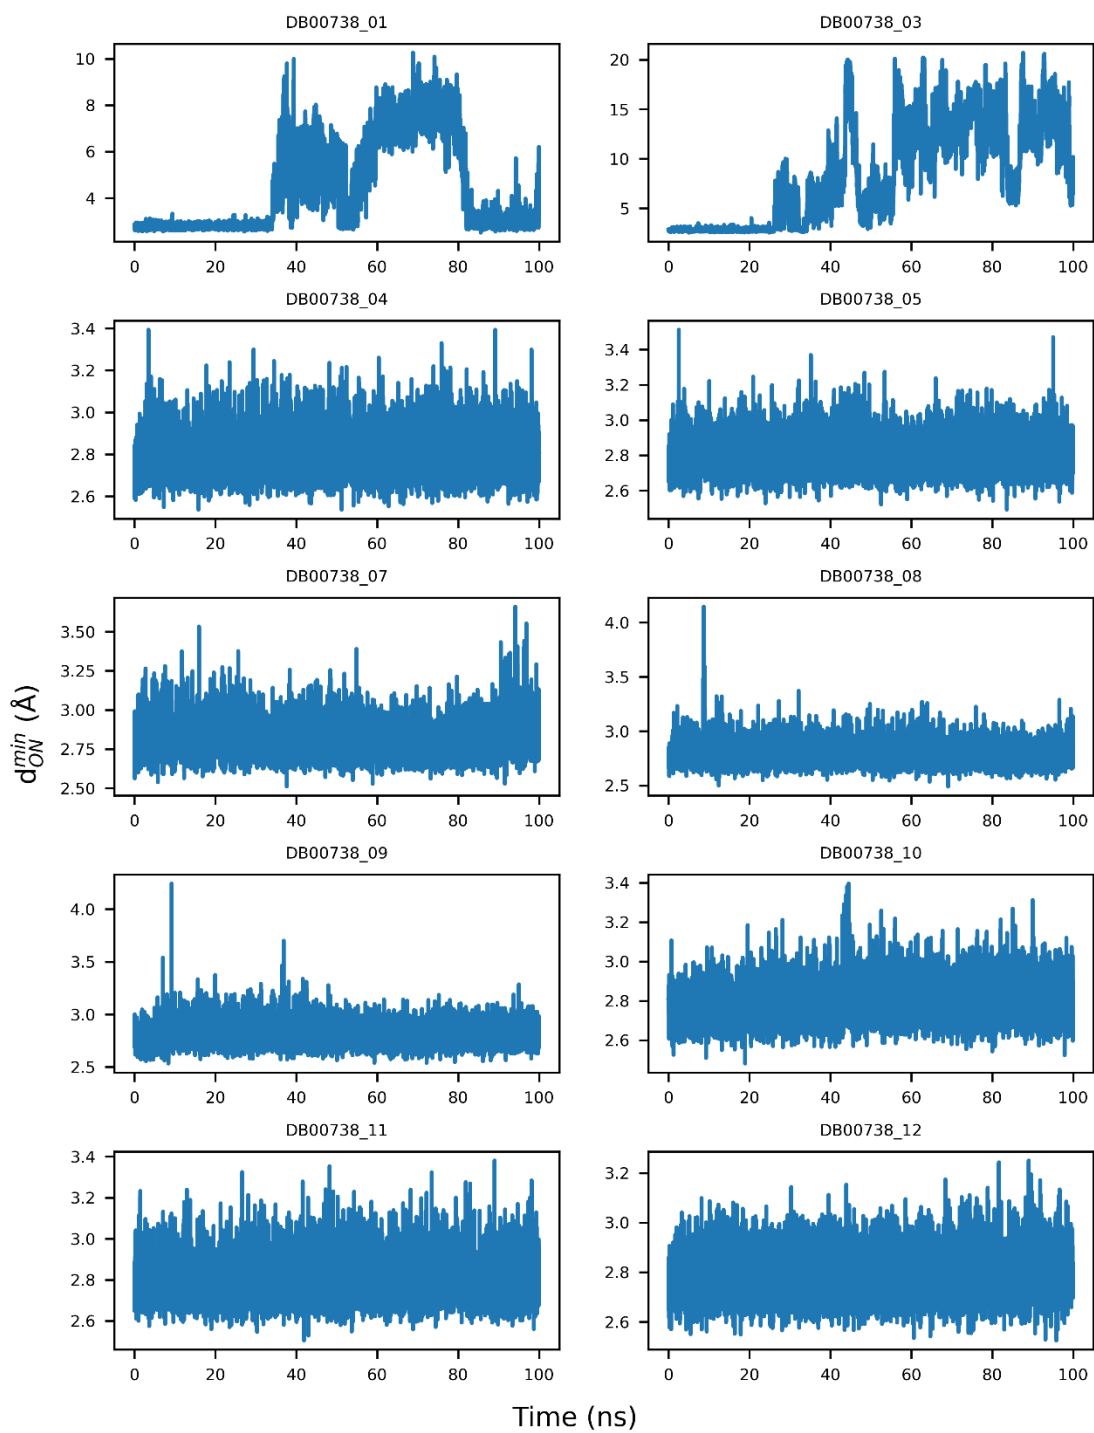

**Figure S7.** The  $d_{ON}^{min}$  distance calculated from 100 ns molecular dynamics simulation for each compound with different poses.

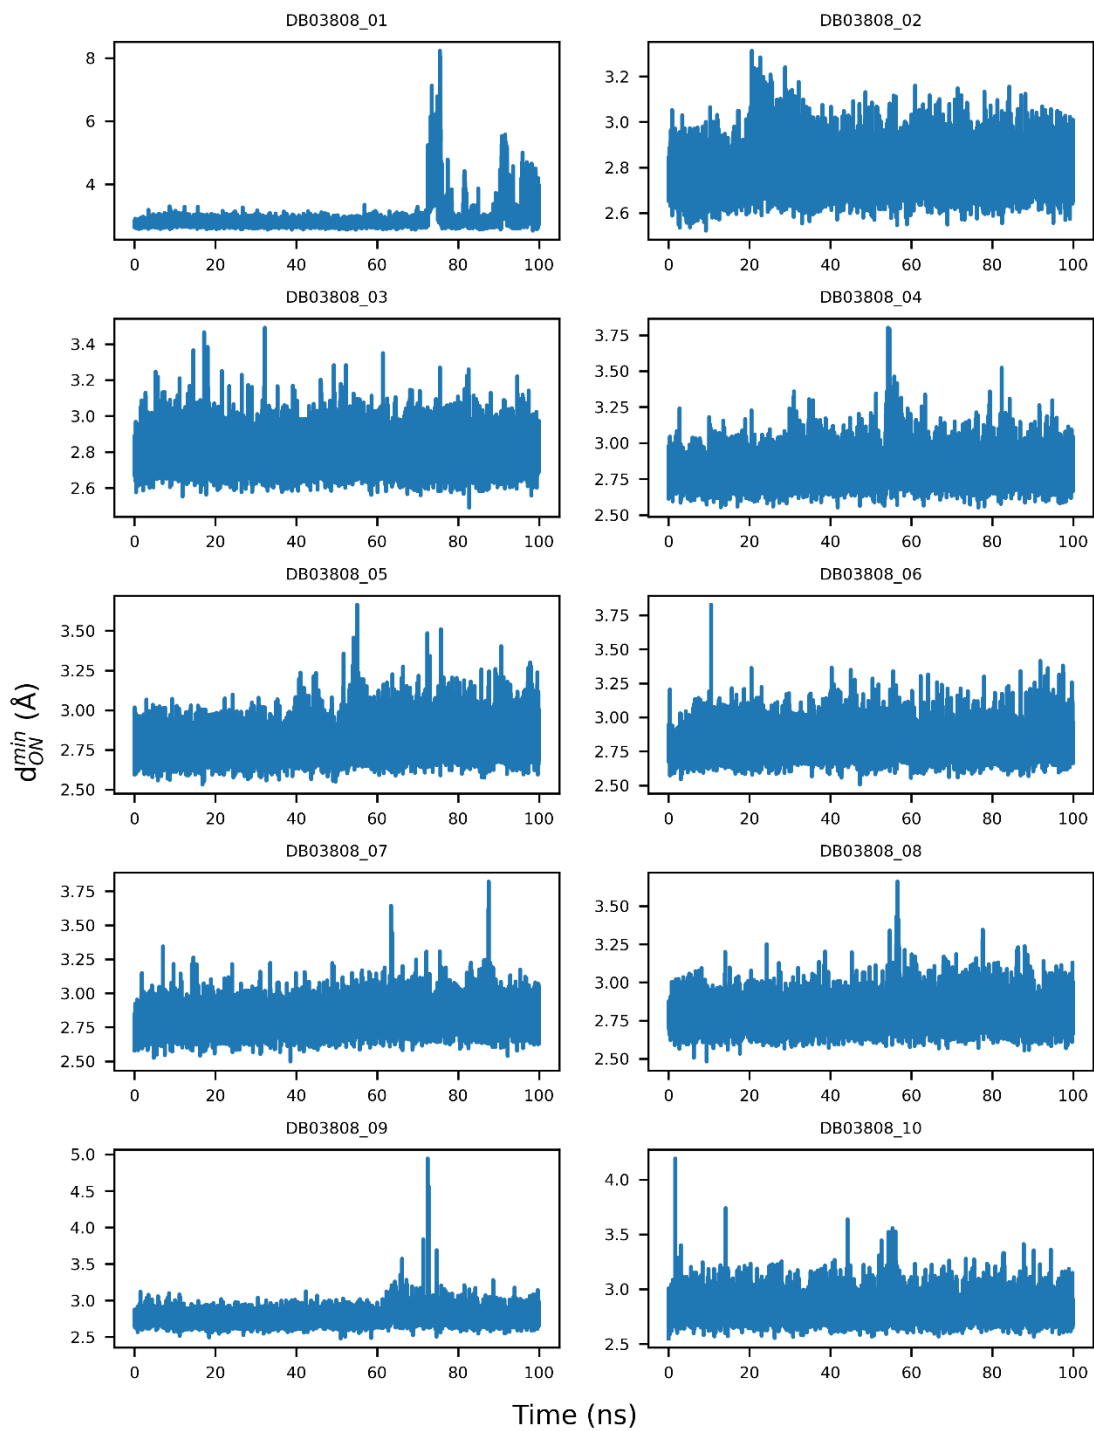

(Figure S7 continued)

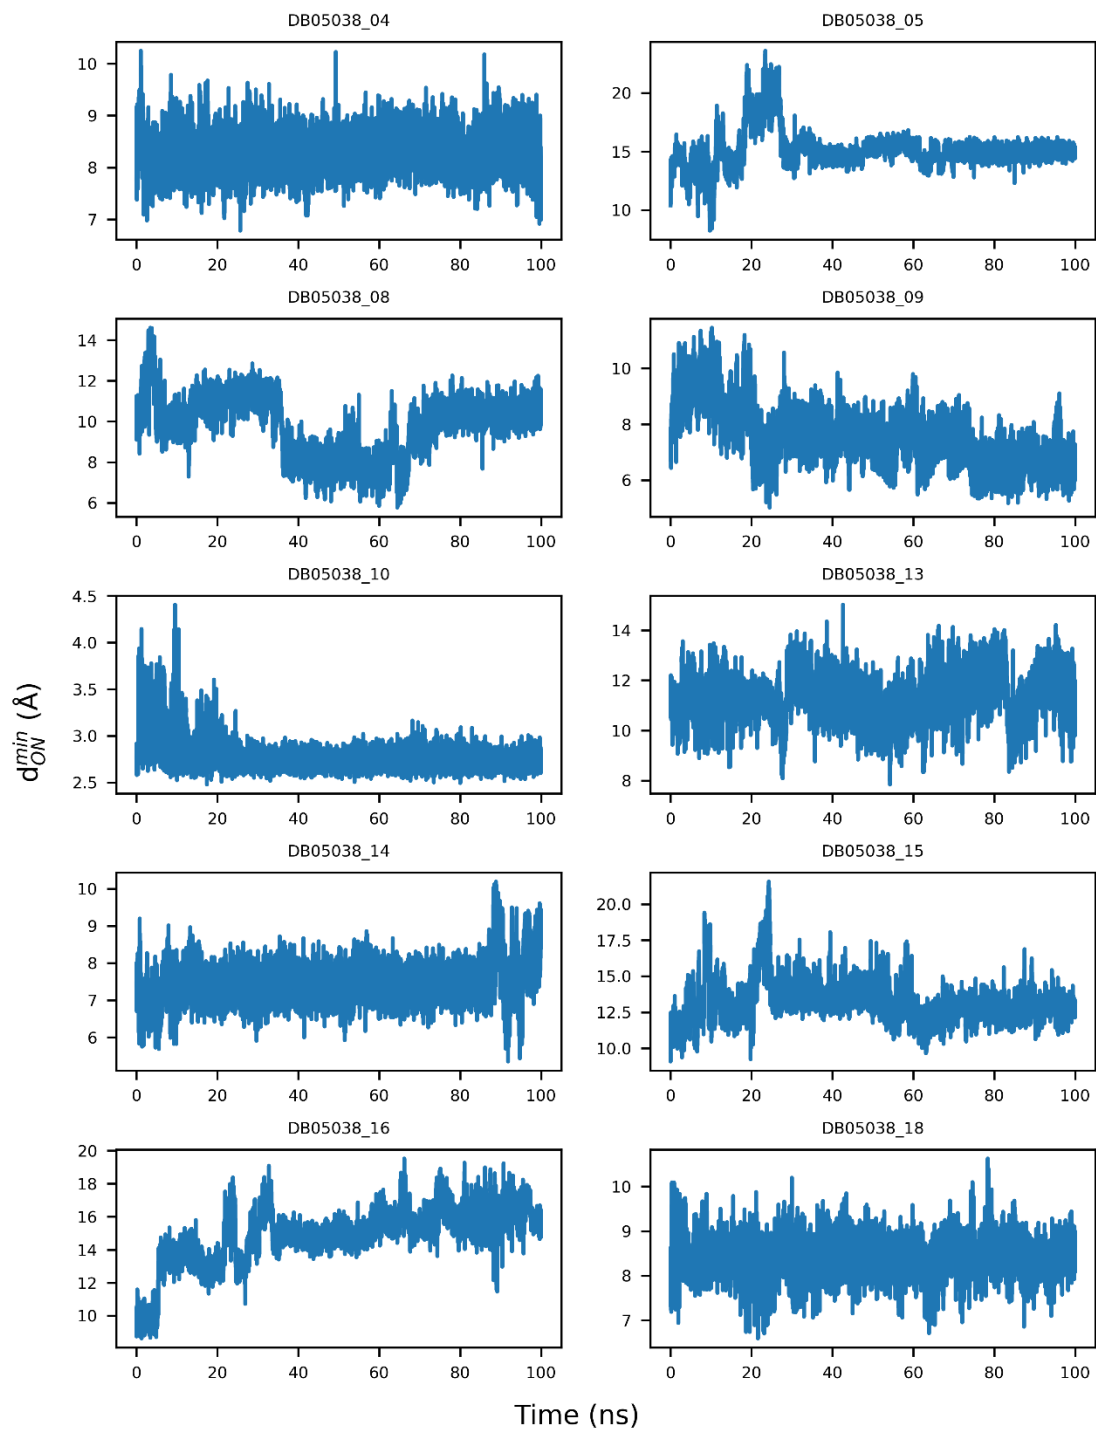

(Figure S7 continued)



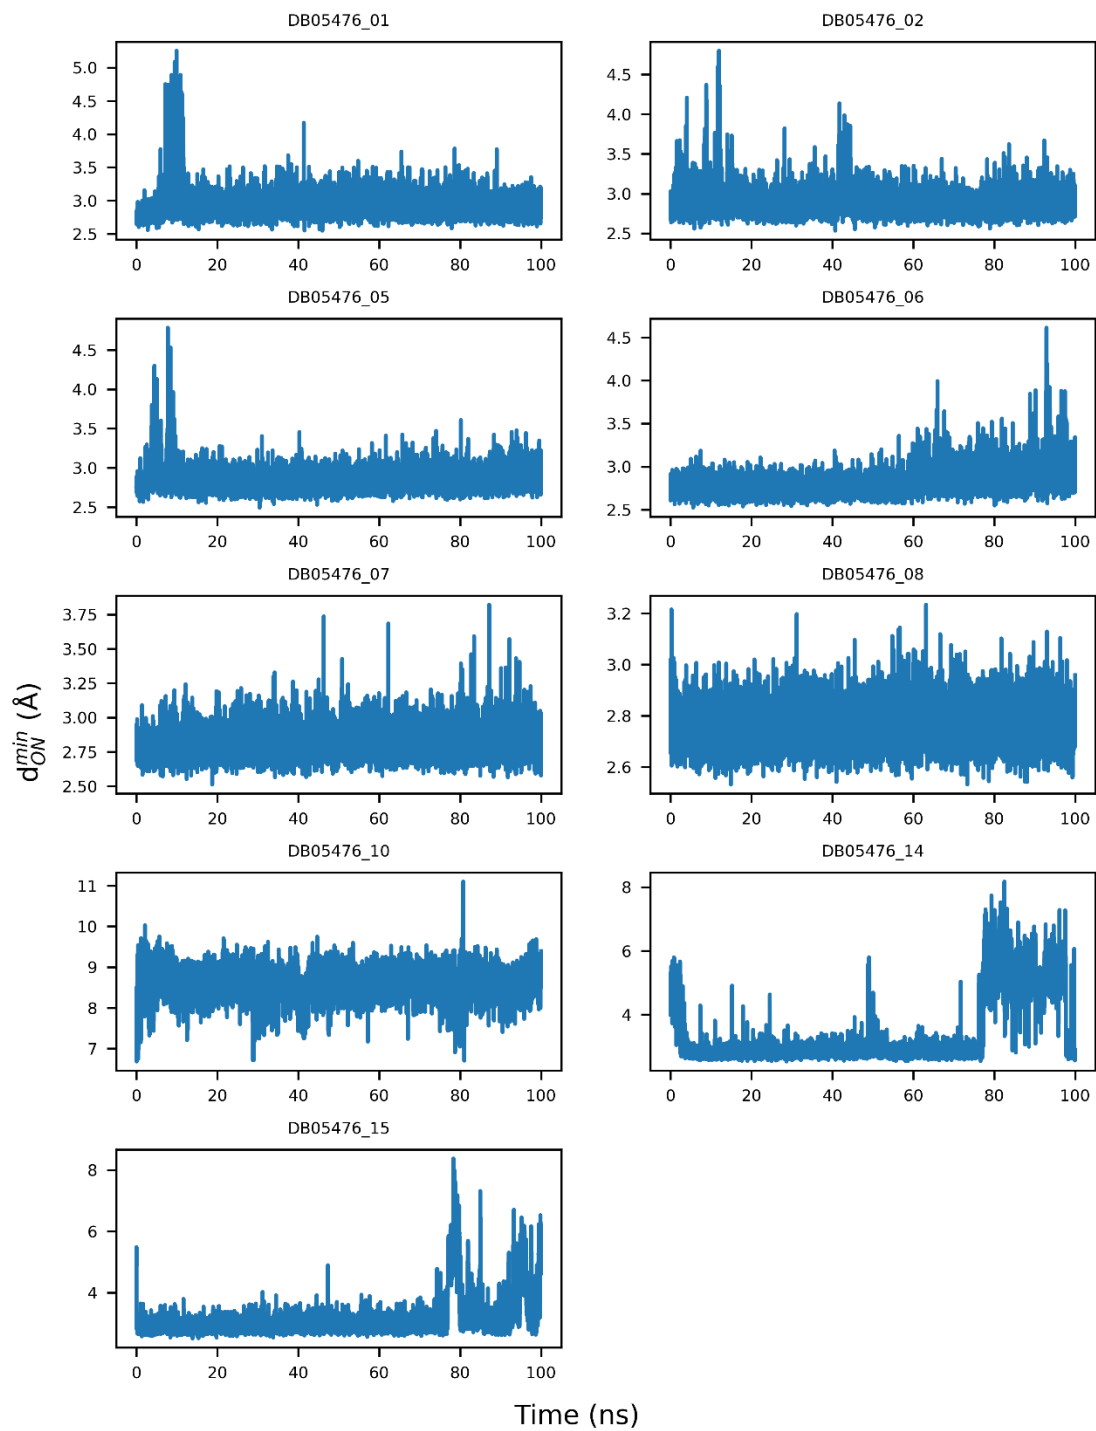

(Figure S7 continued)

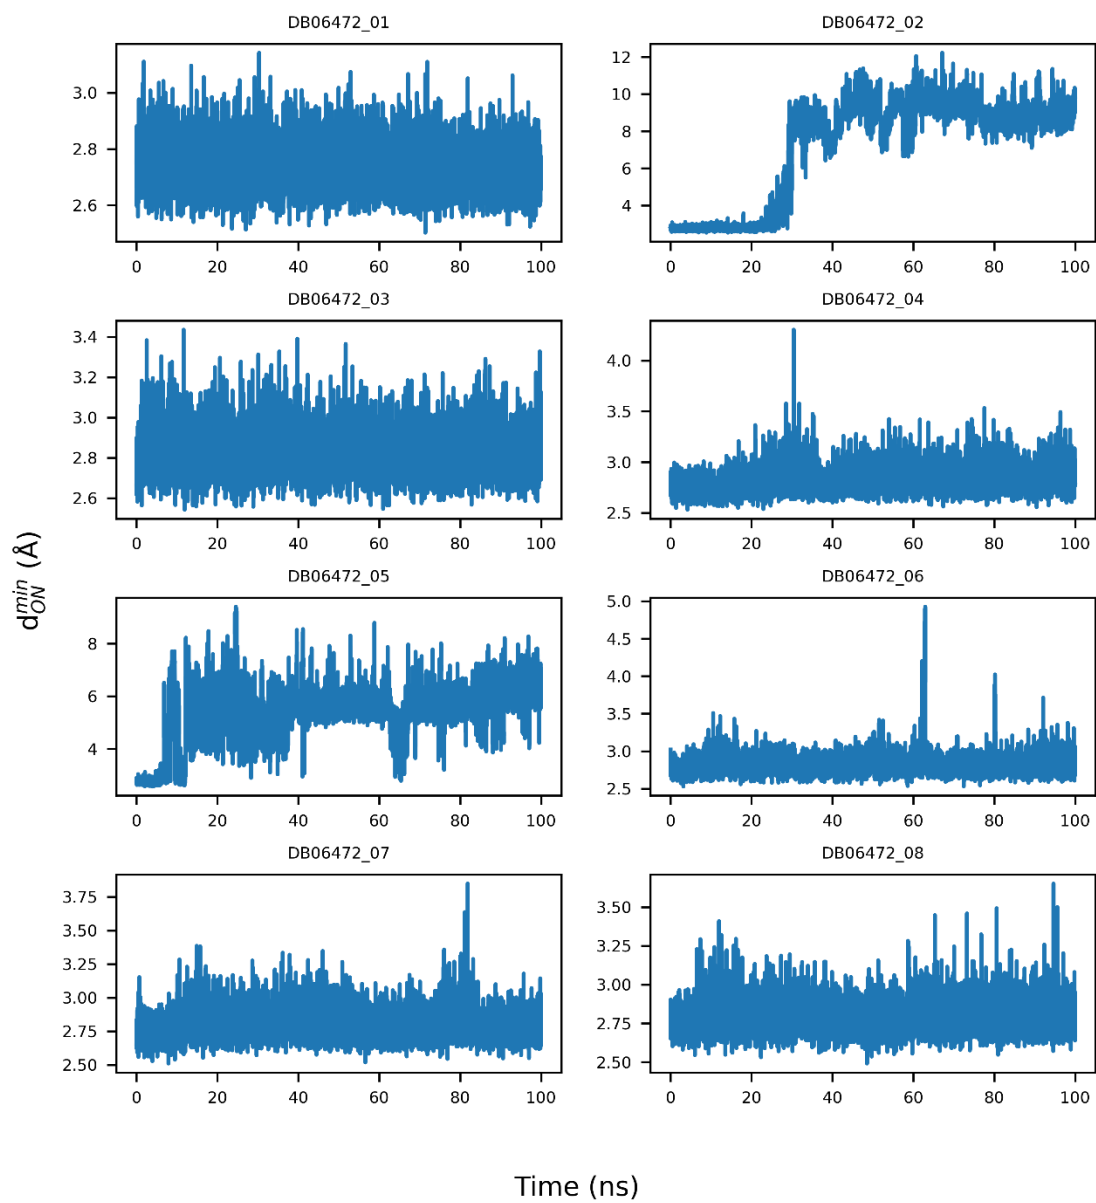

(Figure S7 continued)

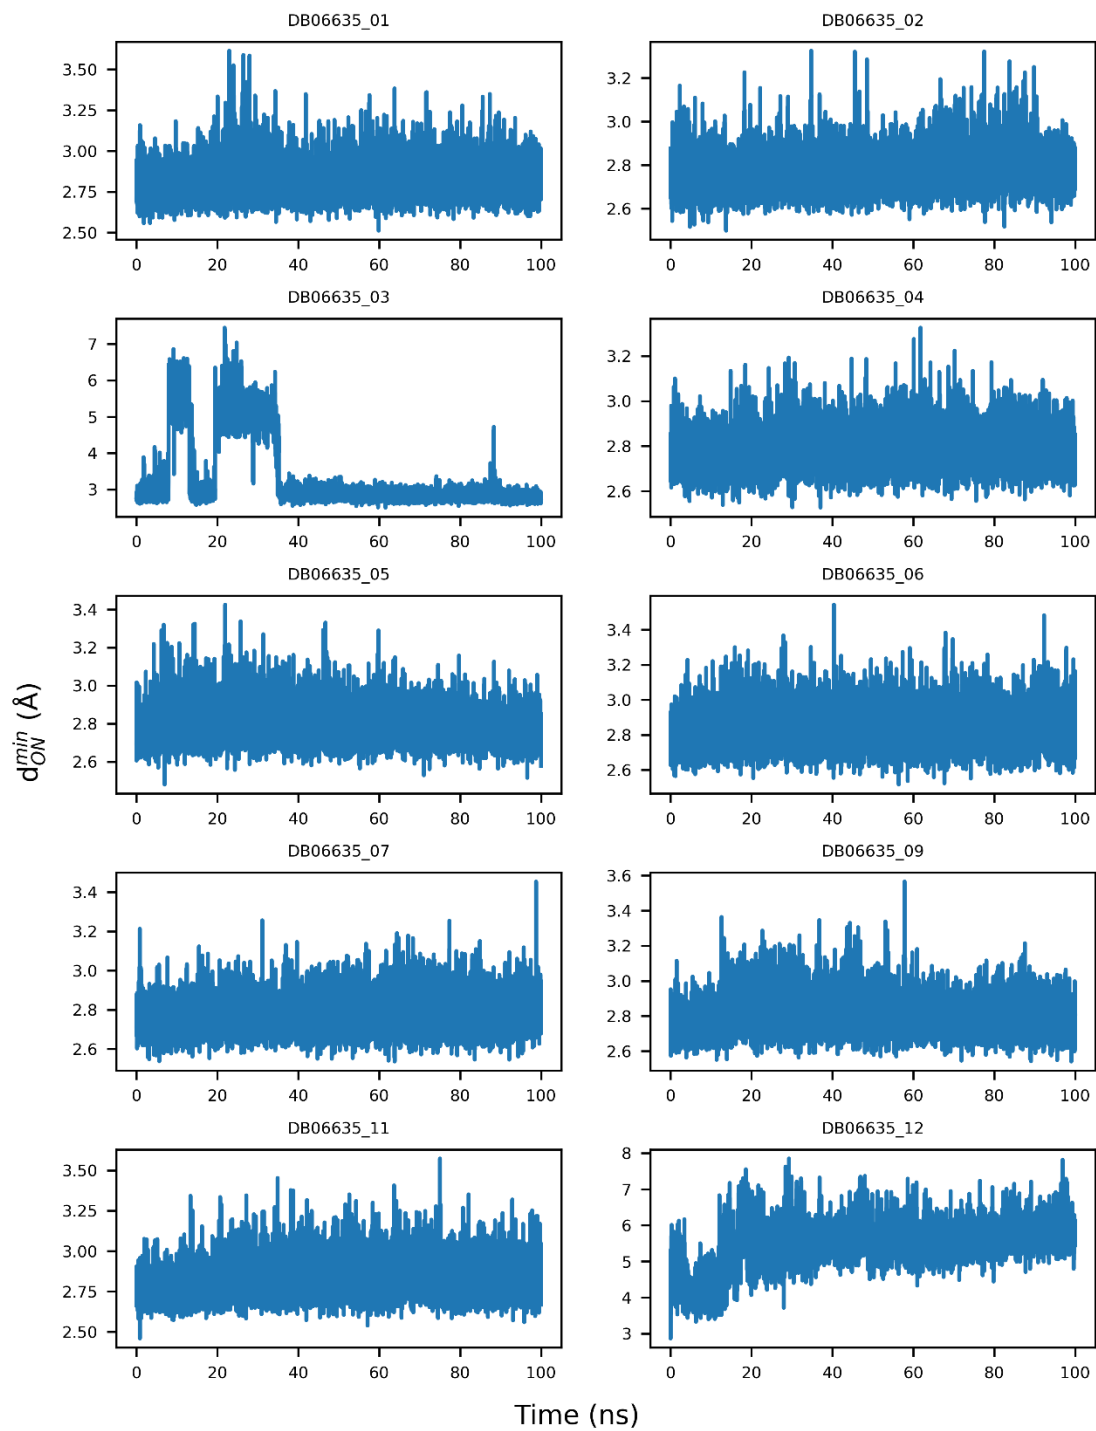

(Figure S7 continued)

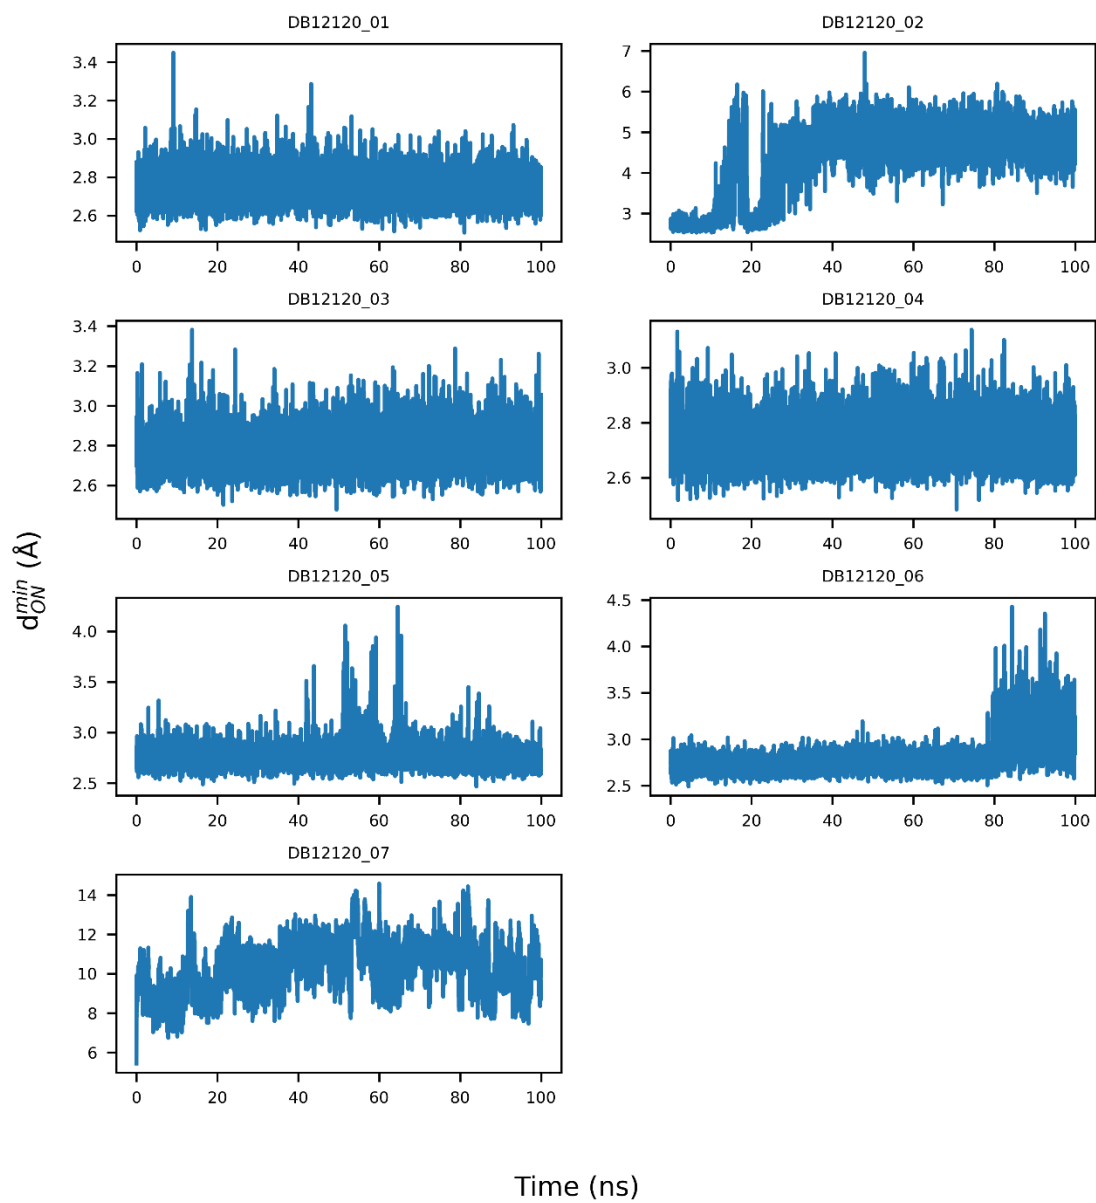

(Figure S7 continued)

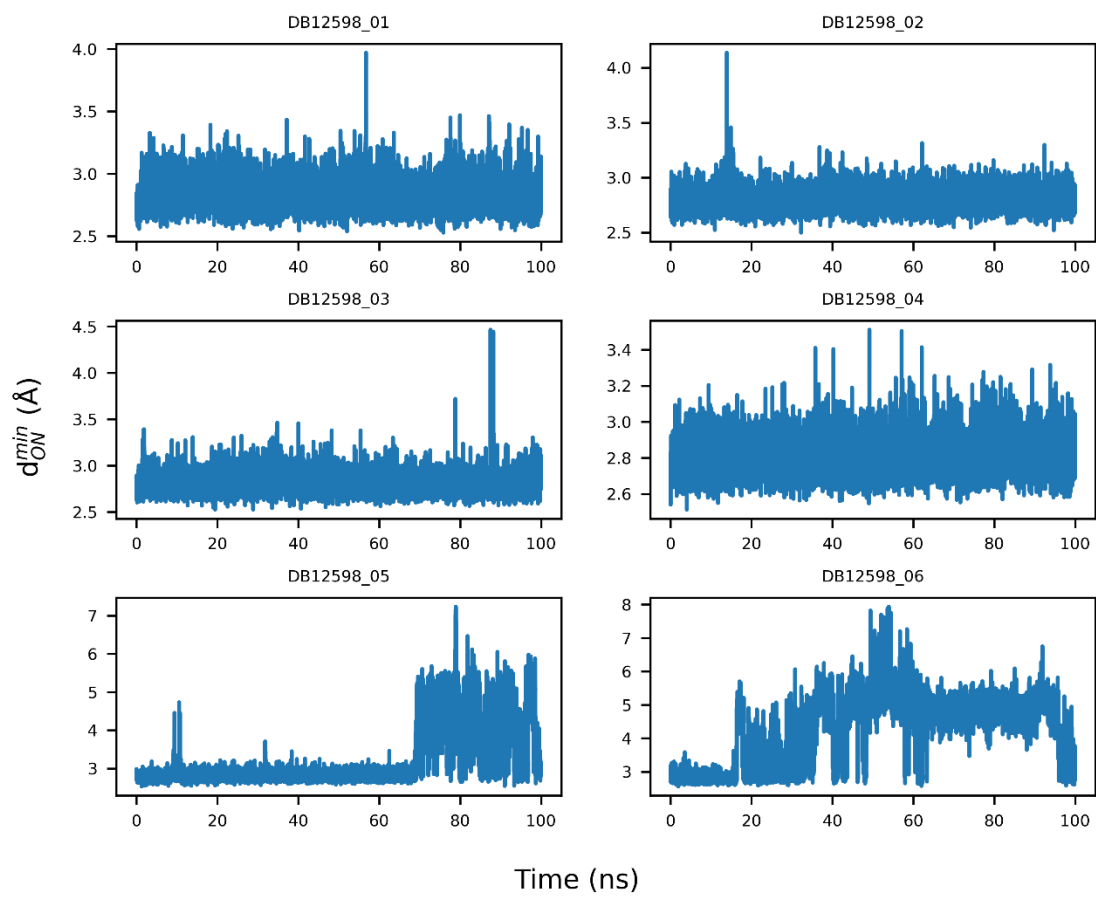

(Figure S7 continued)

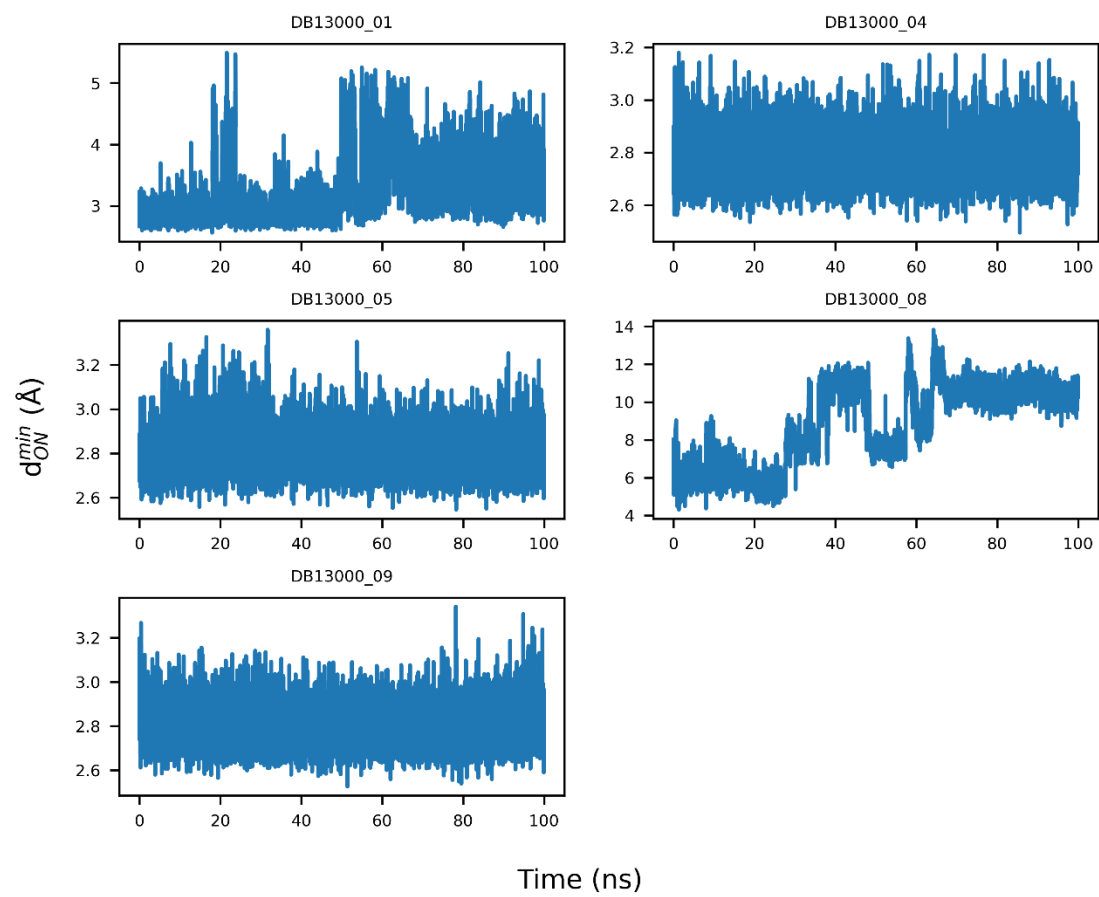

(Figure S7 continued)

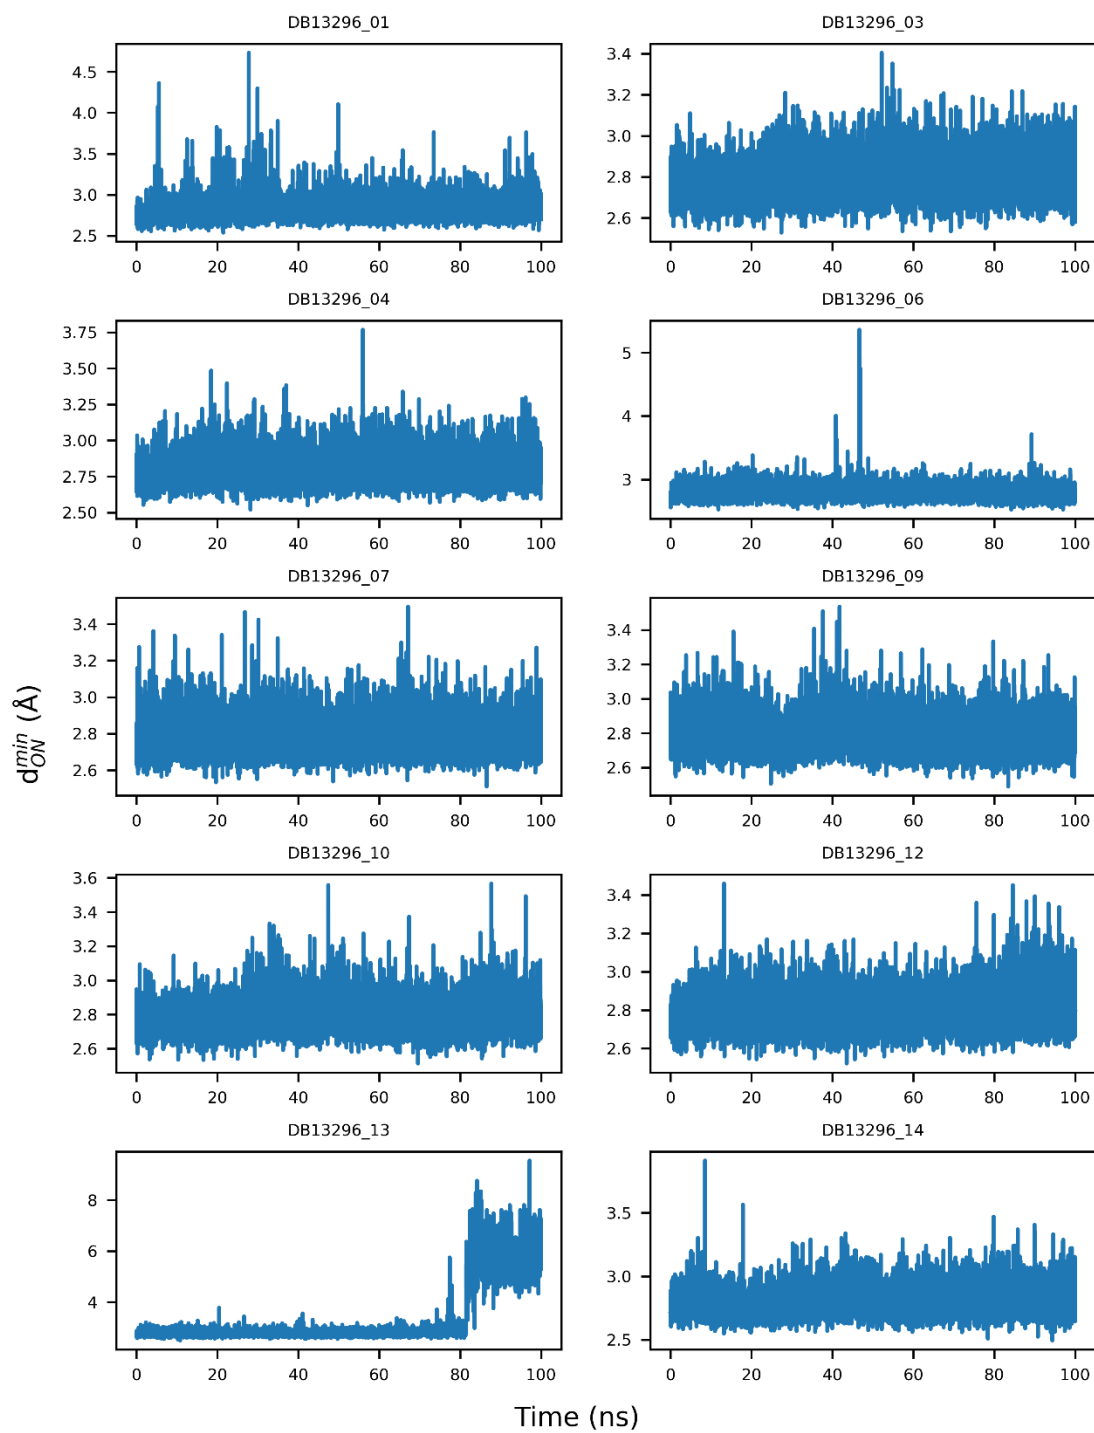

(Figure S7 continued)

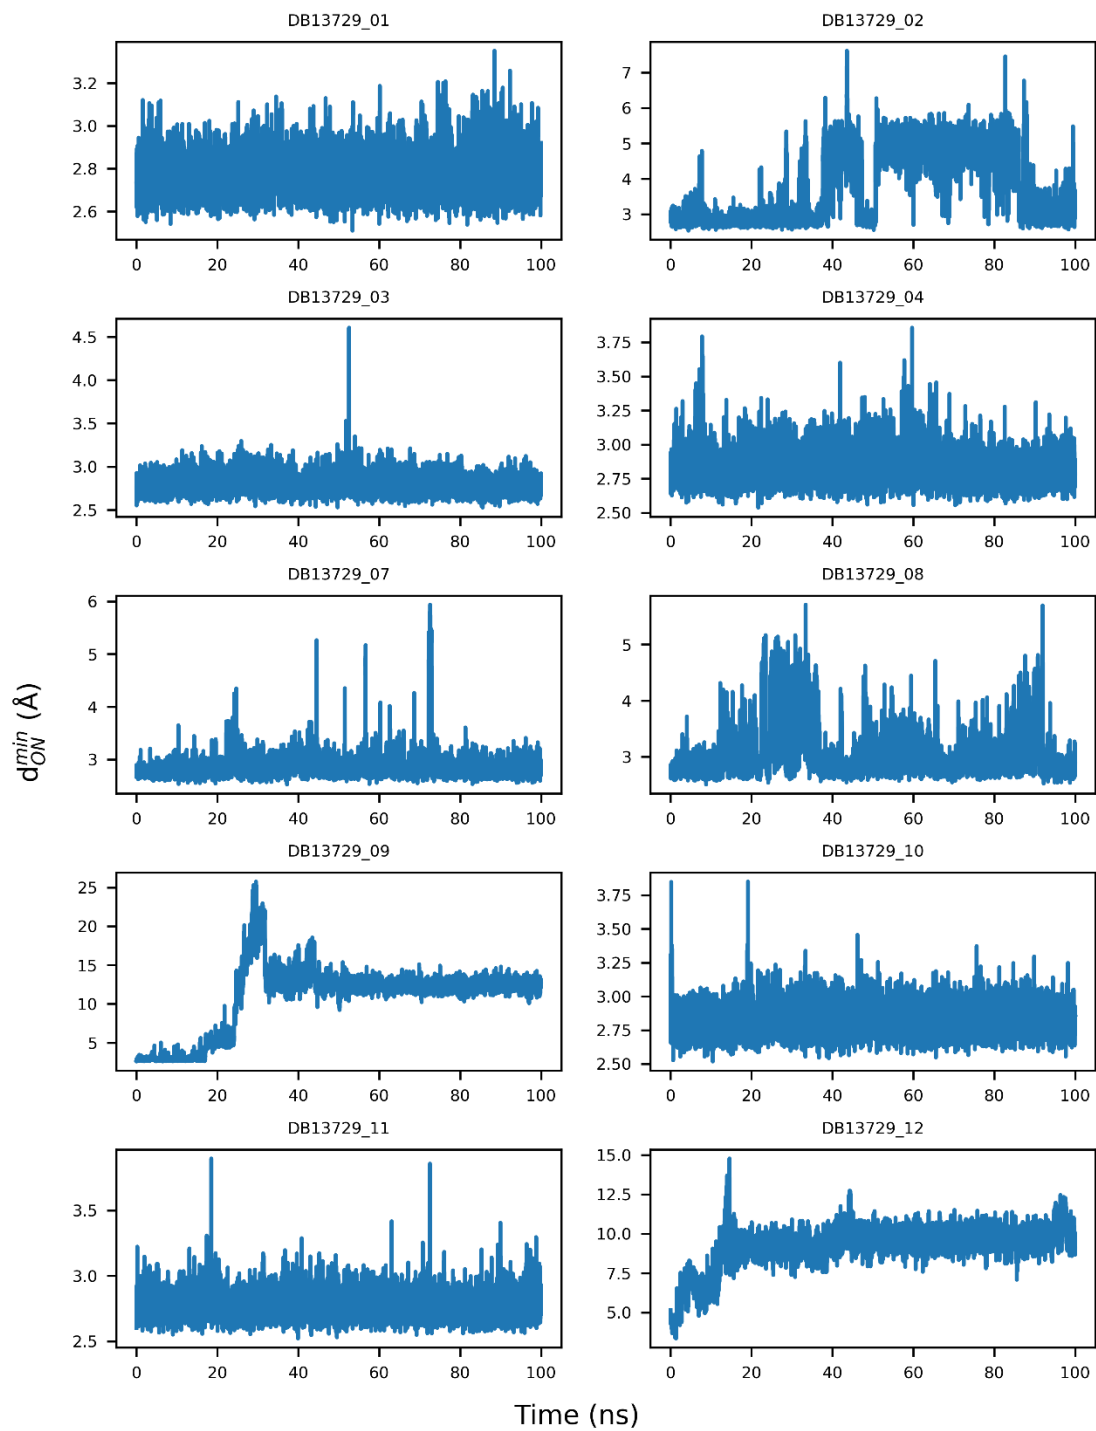

(Figure S7 continued)



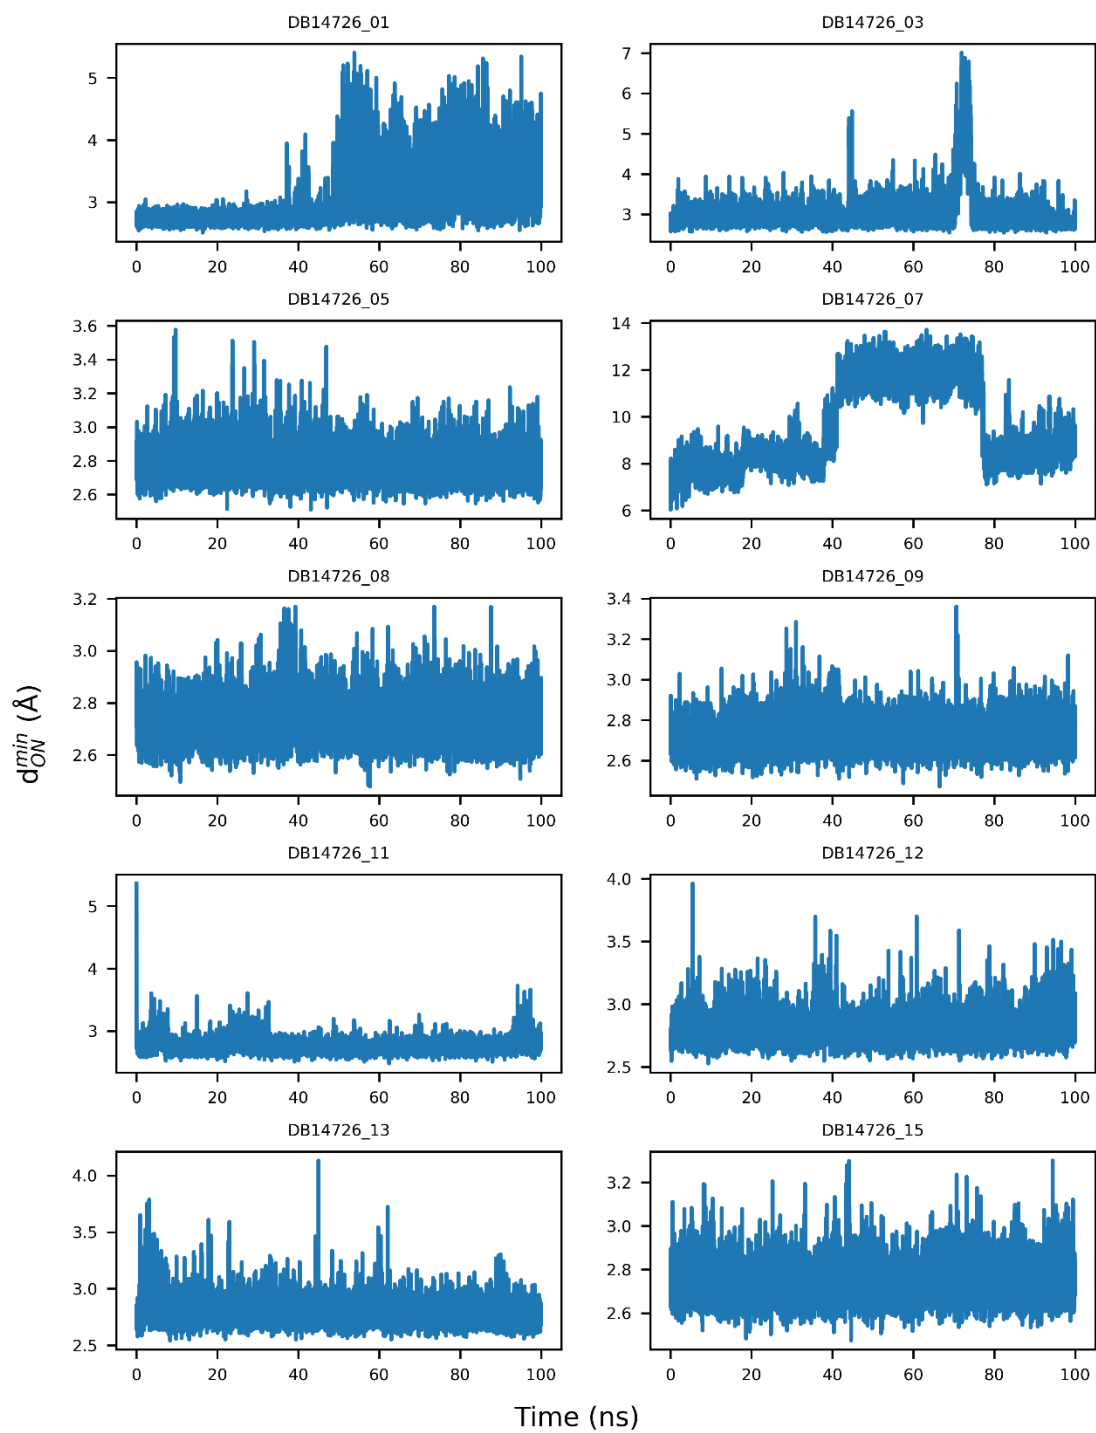

(Figure S7 continued)

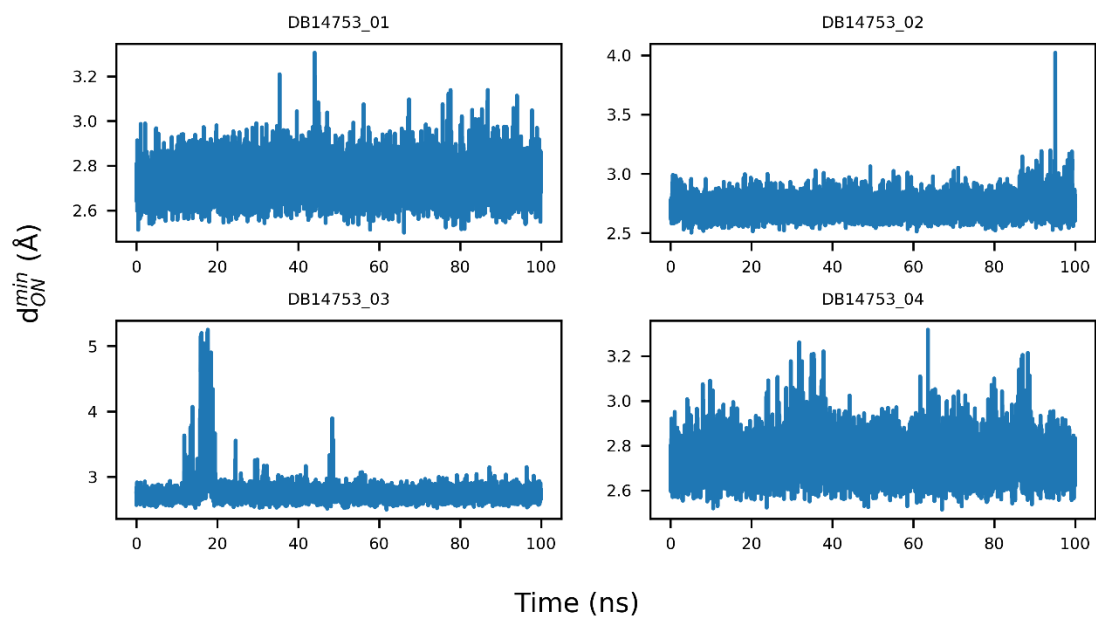

(Figure S7 continued)

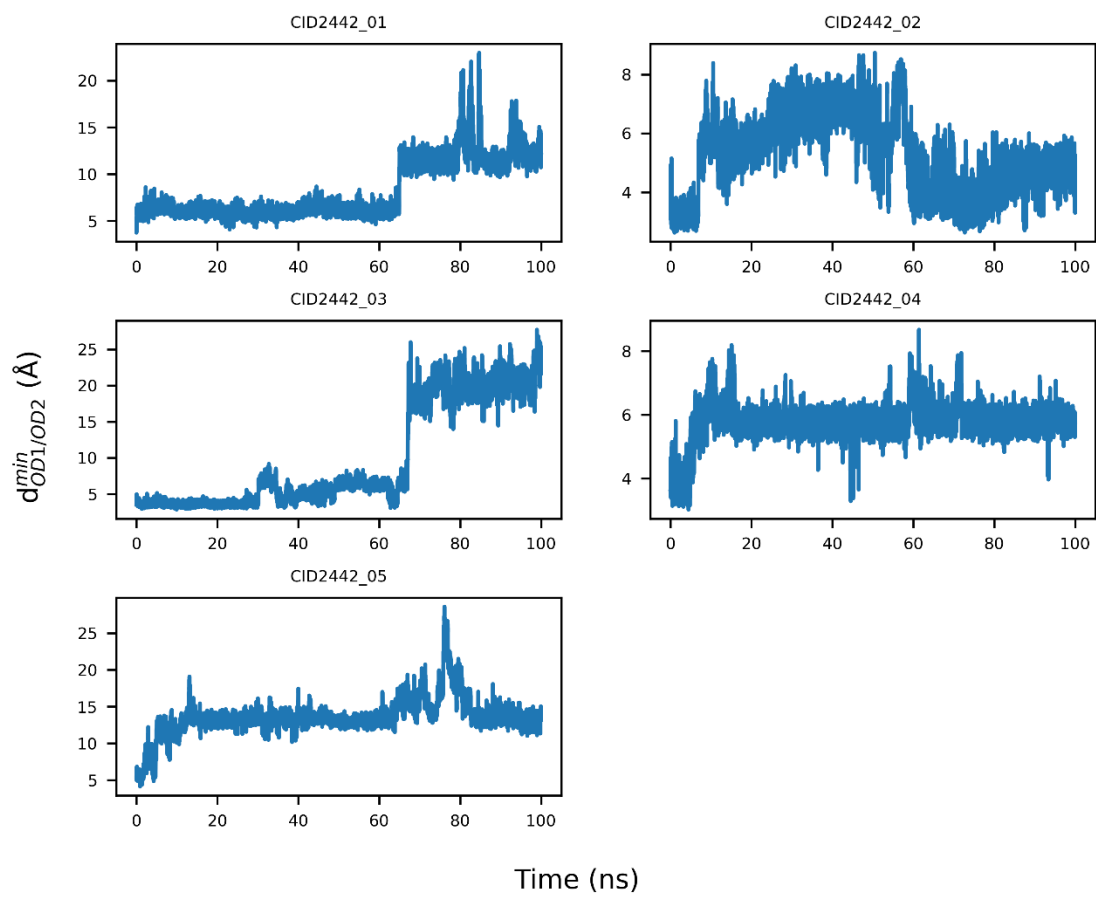

(Figure S7 continued)

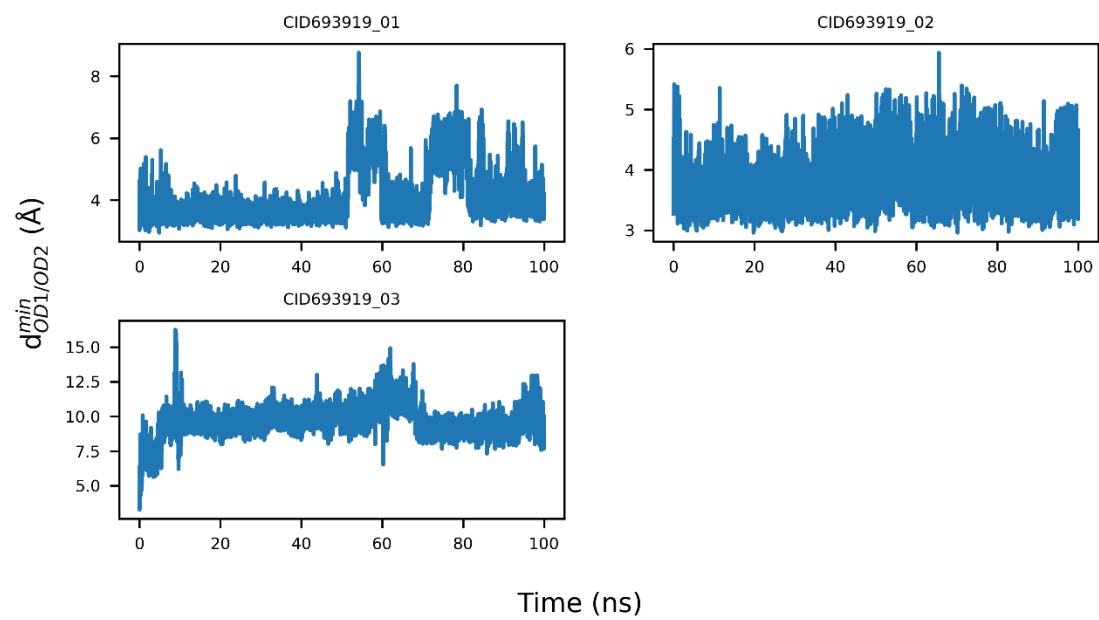

(Figure S7 continued)

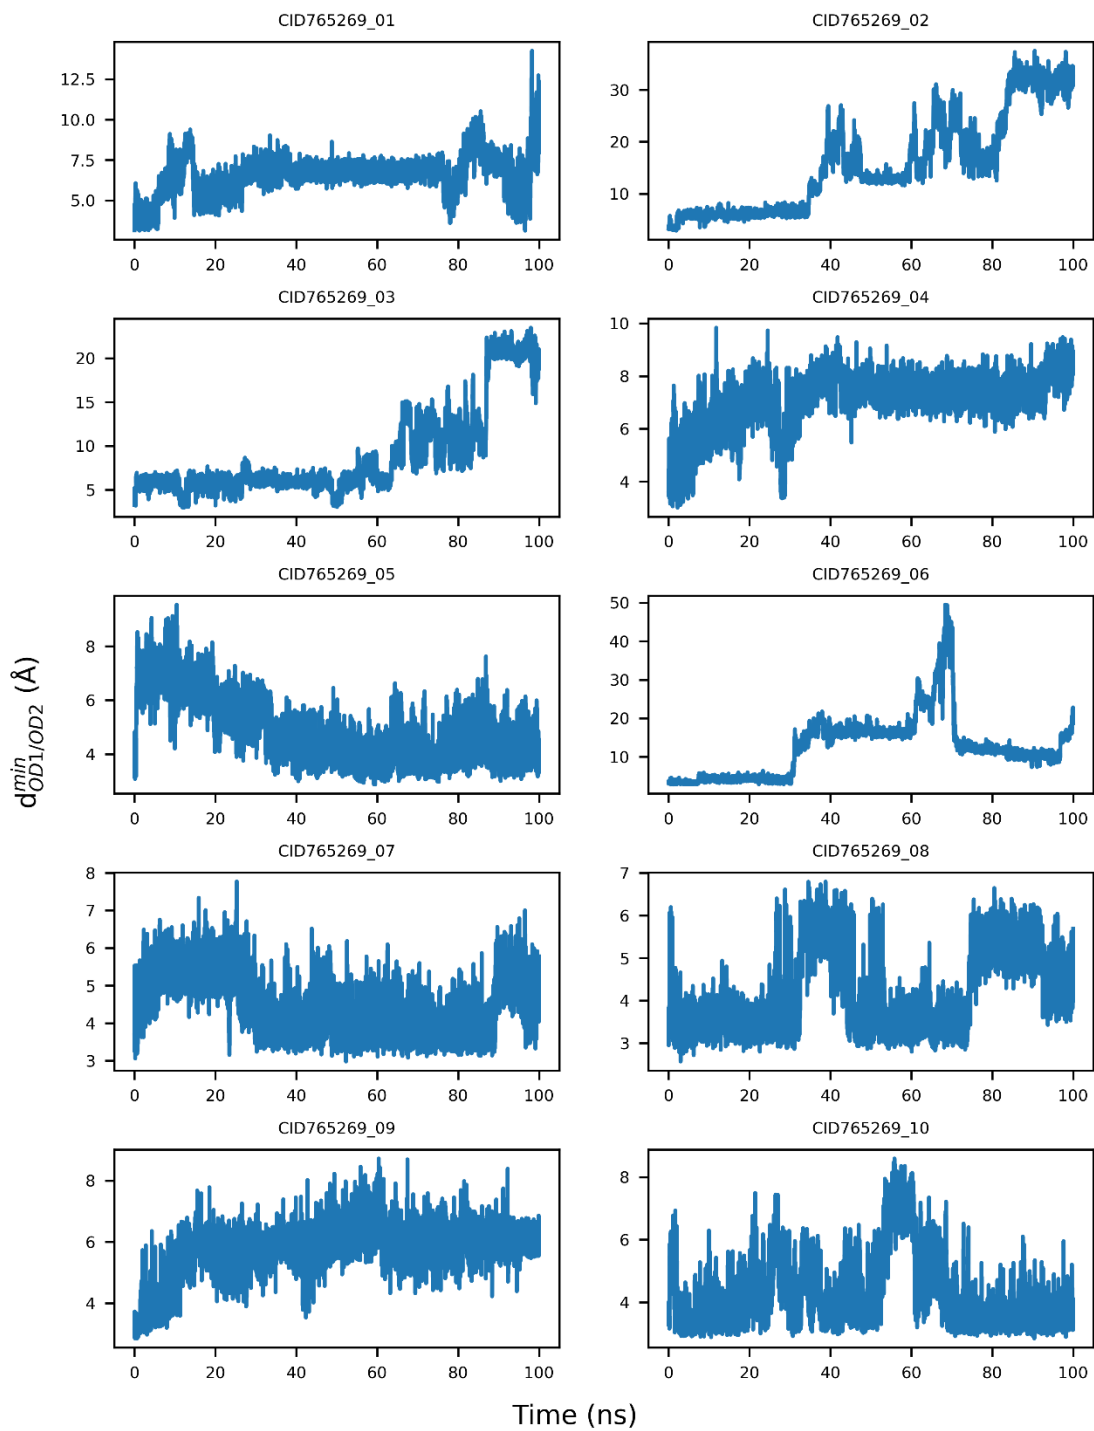

(Figure S7 continued)

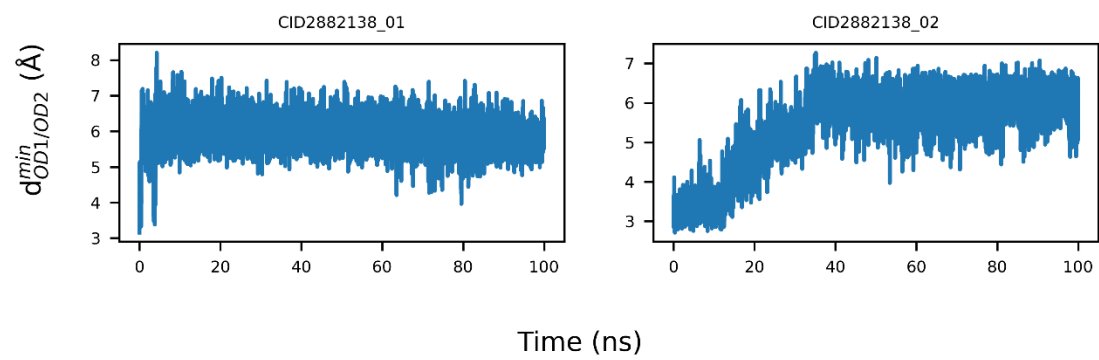

(Figure S7 continued)

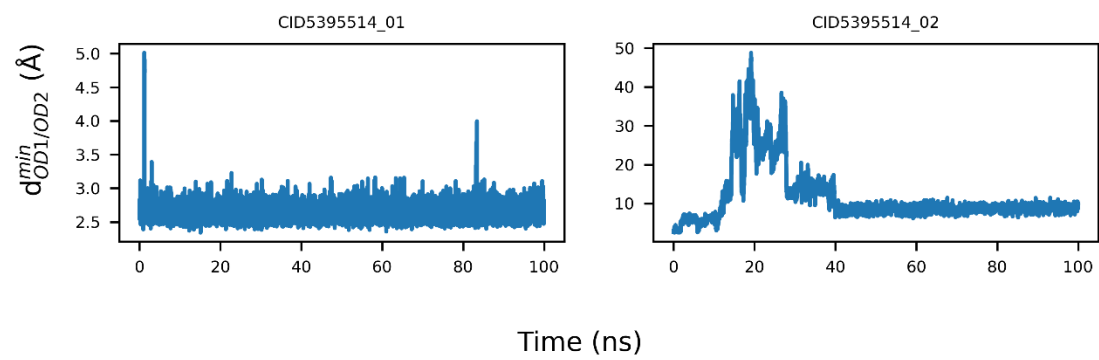

(Figure S7 continued)

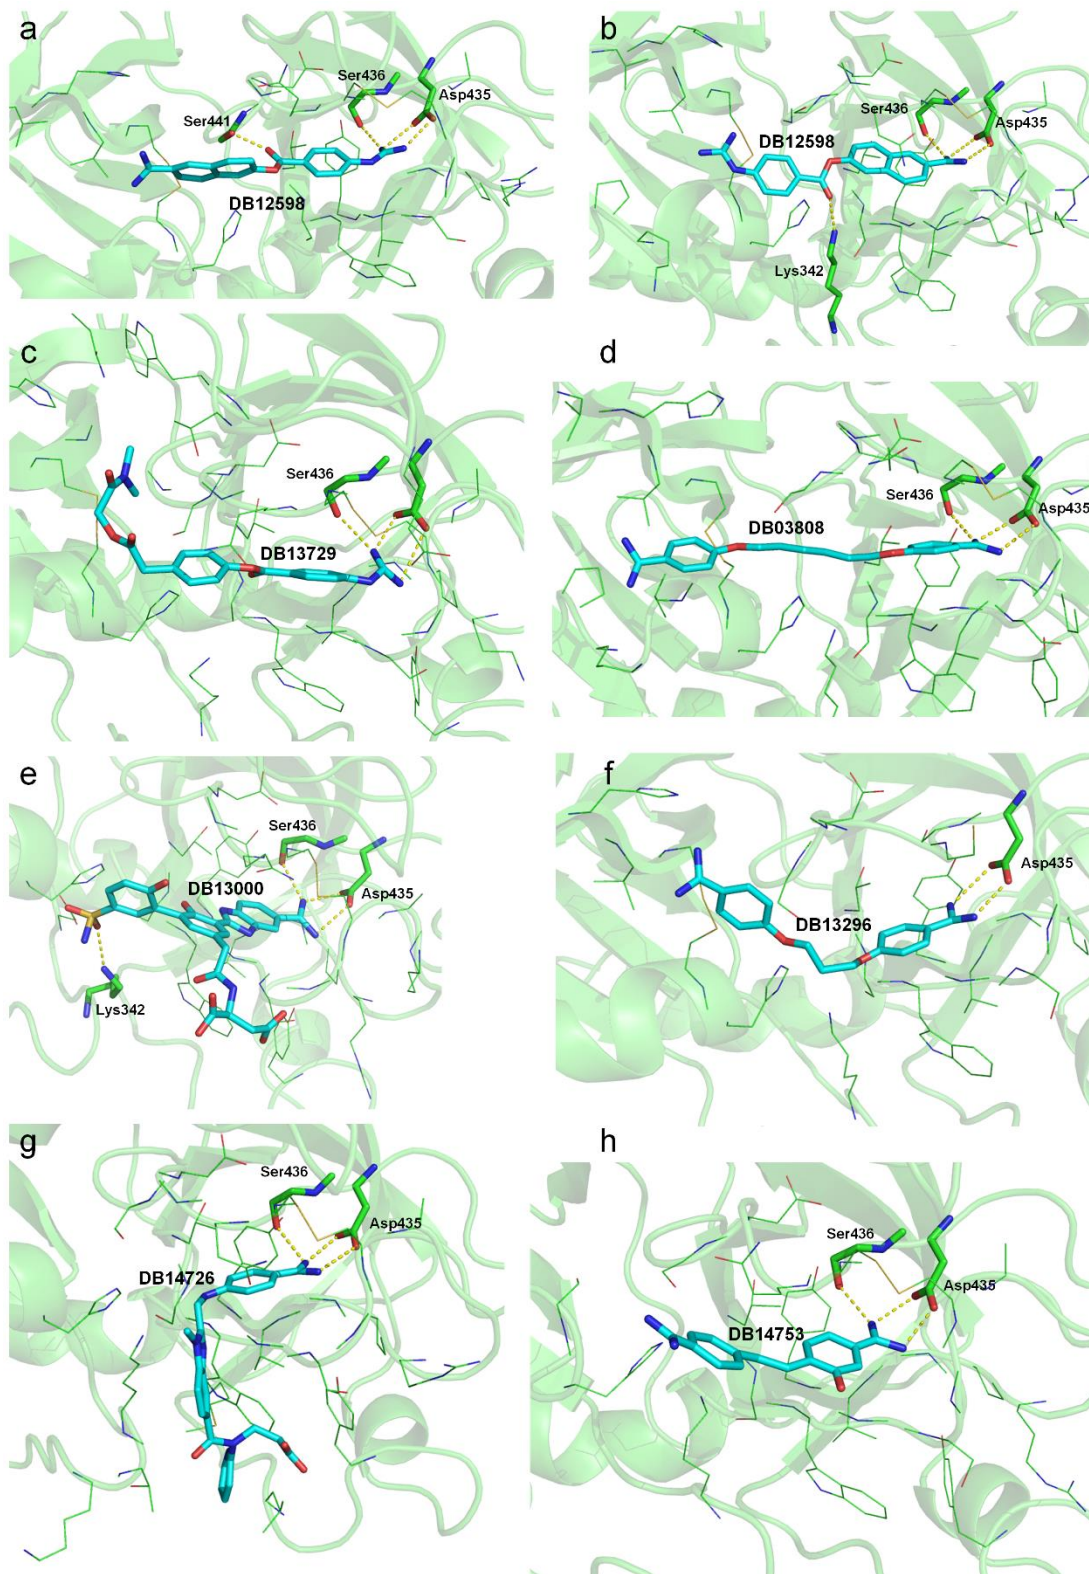

**Figure S8.** Salt-bridge and hydrogen-bonding interactions for other repurposed drugs at the end of the 100-ns MD simulations. Ligands and residues that are involved in hydrogen bonds or salt bridges (marked in yellow dashed lines) are shown in cyan and green sticks, respectively. Other residues are shown in lines.
